# Supplementary material for: Meta-Analysis of Polymyositis and Dermatomyositis Microarray Data Reveals Novel Genetic Biomarkers
Source: MDPI journal article supplement (doi:10.3390/genes10110864), 2019-10-30
Supplement: s1 [file s1]

| Node1   | Node2   | Node1_sting_internal_id | Node2_sting_internal_id | Node1_external_id | Node2_external_id      | Supplementary Table 2. Table used for network construction with to file format. |             |                         |          |             |                                        |                    |       |       |       | Automated_testing | Combined_score |
|---------|---------|-------------------------|-------------------------|-------------------|------------------------|---------------------------------------------------------------------------------|-------------|-------------------------|----------|-------------|----------------------------------------|--------------------|-------|-------|-------|-------------------|----------------|
|         |         |                         |                         |                   |                        | Neighborhooford_on_chromosome                                                   | Gen_Section | Phylogenetic_occurrence | Homology | Congression | Experimentally_determined_interactions | Database_annotated |       |       |       |                   |                |
| NYFA    | NY8     | 1852963                 |                         | 1843547           | 9606.ENSP00000040055   | 0                                                                               | 0           | 0                       | 0        | 0           | 0.988                                  | 0.9                | 0.957 | 0.999 |       |                   |                |
| EGSC2   | EGSC4   | 1855666                 |                         | 1849789           | 9606.ENSP00000018143   | 0.309                                                                           | 0           | 0                       | 0.318    | 0           | 0.084                                  | 0.987              | 0.9   | 0.804 | 0.999 |                   |                |
| EGSC10  | EGSC4   | 1849789                 |                         | 1849789           | 9606.ENSP00000018143   | 0                                                                               | 0           | 0                       | 0        | 0           | 0.989                                  | 0.9                | 0.941 | 0.999 |       |                   |                |
| IM3     | RP14    | 1850884                 |                         | 1849373           | 9606.ENSP000000126881  | 0.309                                                                           | 0           | 0                       | 0        | 0           | 0.985                                  | 0.973              | 0.924 | 0.254 | 0.999 |                   |                |
| LSM4    | LSM1    | 1846141                 |                         | 1849373           | 9606.ENSP00000040468   | 0                                                                               | 0           | 0                       | 0        | 0           | 0.101                                  | 0.887              | 0.9   | 0.902 | 0.999 |                   |                |
| CP92    | CP2     | 1843147                 |                         | 1843147           | 9606.ENSP000000234919  | 0                                                                               | 0           | 0                       | 0        | 0           | 0.124                                  | 0.958              | 0.974 | 0.9   | 0.999 |                   |                |
| TME2D   | TME2D   | 1848494                 |                         | 1845096           | 9606.ENSP00000003145   | 0                                                                               | 0           | 0                       | 0        | 0.701       | 0.554                                  | 0.989              | 0.9   | 0.883 | 0.999 |                   |                |
| AT2M1   | AT2M1   | 1849703                 |                         | 1843739           | 9606.ENSP000000014414  | 0                                                                               | 0           | 0                       | 0        | 0           | 0.221                                  | 0.987              | 0.9   | 0.935 | 0.999 |                   |                |
| EGSC10  | EGSC5   | 1855666                 |                         | 1843621           | 9606.ENSP000000046135  | 0                                                                               | 0           | 0                       | 0        | 0           | 0.981                                  | 0.987              | 0.9   | 0.937 | 0.999 |                   |                |
| EGSC2   | EGSC1   | 1855666                 |                         | 1853389           | 9606.ENSP000000036143  | 0                                                                               | 0           | 0                       | 0        | 0           | 0.33                                   | 0.997              | 0.9   | 0.846 | 0.999 |                   |                |
| CP92    | CP92    | 1857348                 |                         | 1843313           | 9606.ENSP000000070589  | 0                                                                               | 0           | 0                       | 0        | 0           | 0.672                                  | 0.9                | 0.82  | 0.999 |       |                   |                |
| EGSC9   | EGSC2   | 1857072                 |                         | 1855666           | 9606.ENSP000000368894  | 0.309                                                                           | 0           | 0                       | 0.232    | 0.0         | 0.464                                  | 0.997              | 0.9   | 0.758 | 0.999 |                   |                |
| YE16    | BE11    | 1842981                 |                         | 1842924           | 9606.ENSP000000023369  | 0                                                                               | 0           | 0                       | 0        | 0           | 0.128                                  | 0.914              | 0.9   | 0.854 | 0.999 |                   |                |
| CP92    | ACN1    | 1851147                 |                         | 1849402           | 9606.ENSP000000023419  | 0                                                                               | 0           | 0                       | 0        | 0           | 0.959                                  | 0.9                | 0.94  | 0.999 |       |                   |                |
| DNCT    | DNCT    | 1855055                 |                         | 1846399           | 9606.ENSP000000015853  | 0.309                                                                           | 0           | 0                       | 0        | 0           | 0.952                                  | 0.931              | 0.9   | 0.892 | 0.999 |                   |                |
| EGSC10  | EGSC1   | 1856380                 |                         | 1853389           | 9606.ENSP000000036135  | 0                                                                               | 0           | 0                       | 0        | 0           | 0.084                                  | 0.989              | 0.9   | 0.73  | 0.999 |                   |                |
| ATRVH01 | ATRVH1  | 1847269                 |                         | 1844340           | 9606.ENSP000000027059  | 0.309                                                                           | 0           | 0                       | 0        | 0           | 0.175                                  | 0.943              | 0.9   | 0.843 | 0.999 |                   |                |
| EGSC10  | EGSC2   | 1856380                 |                         | 1855666           | 9606.ENSP000000036135  | 0                                                                               | 0           | 0                       | 0        | 0           | 0.124                                  | 0.989              | 0.9   | 0.688 | 0.999 |                   |                |
| EGSC2   | EGSC5   | 1855666                 |                         | 1843621           | 9606.ENSP000000031453  | 0.309                                                                           | 0           | 0                       | 0.356    | 0           | 0.729                                  | 0.989              | 0.9   | 0.846 | 0.999 |                   |                |
| EF4E1   | EF4E1   | 1861639                 |                         | 1852358           | 9606.ENSP000000042581  | 0                                                                               | 0           | 0                       | 0        | 0           | 0.99                                   | 0.9                | 0.976 | 0.999 |       |                   |                |
| EGSC4   | EGSC4   | 1849789                 |                         | 1843621           | 9606.ENSP0000000315476 | 0                                                                               | 0           | 0                       | 0.503    | 0.741       | 0.31                                   | 0.987              | 0.9   | 0.93  | 0.999 |                   |                |
| GGK2    | BE11    | 1843622                 |                         | 1842924           | 9606.ENSP000000023587  | 0                                                                               | 0           | 0                       | 0        | 0           | 0.216                                  | 0.862              | 0.9   | 0.941 | 0.999 |                   |                |
| EF4C1   | EF4C1   | 1852064                 |                         | 1850625           | 9606.ENSP000000038820  | 0                                                                               | 0           | 0                       | 0        | 0           | 0.074                                  | 0.709              | 0.9   | 0.976 | 0.999 |                   |                |
| EGSC1   | EGSC4   | 1853389                 |                         | 1849789           | 9606.ENSP000000039339  | 0                                                                               | 0           | 0                       | 0        | 0           | 0.285                                  | 0.997              | 0.9   | 0.93  | 0.999 |                   |                |
| EGSC1   | EGSC1   | 1857072                 |                         | 1853389           | 9606.ENSP000000036894  | 0                                                                               | 0           | 0                       | 0        | 0           | 0.309                                  | 0.997              | 0.9   | 0.826 | 0.999 |                   |                |
| ACN1    | CP91    | 1845462                 |                         | 1843983           | 9606.ENSP0000000264028 | 0                                                                               | 0           | 0                       | 0        | 0           | 0.49523                                | 0.959              | 0.9   | 0.671 | 0.999 |                   |                |
| NP95    | NP91    | 1857348                 |                         | 1848988           | 9606.ENSP000000037059  | 0                                                                               | 0           | 0                       | 0        | 0           | 0.081                                  | 0.622              | 0.9   | 0.466 | 0.999 |                   |                |
| EGSC1   | EGSC5   | 1855666                 |                         | 1843621           | 9606.ENSP000000039339  | 0                                                                               | 0           | 0                       | 0        | 0           | 0.174                                  | 0.987              | 0.9   | 0.932 | 0.999 |                   |                |
| EF4E    | EF4C1   | 1861639                 |                         | 1852064           | 9606.ENSP000000042581  | 0                                                                               | 0           | 0                       | 0        | 0           | 0.091                                  | 0.989              | 0.9   | 0.981 | 0.999 |                   |                |
| EGSC9   | EGSC5   | 1857072                 |                         | 1843621           | 9606.ENSP000000036894  | 0.309                                                                           | 0           | 0                       | 0.446    | 0           | 0.263                                  | 0.987              | 0.9   | 0.92  | 0.999 |                   |                |
| EGSC10  | EGSC10  | 1857072                 |                         | 1855666           | 9606.ENSP000000036894  | 0                                                                               | 0           | 0                       | 0        | 0           | 0.981                                  | 0.987              | 0.9   | 0.951 | 0.999 |                   |                |
| NP95    | DNCT    | 1857348                 |                         | 1855055           | 9606.ENSP000000037059  | 0.163                                                                           | 0           | 0                       | 0        | 0           | 0.954                                  | 0.885              | 0.9   | 0.823 | 0.999 |                   |                |
| EGSC4   | EGSC4   | 1857072                 |                         | 1849789           | 9606.ENSP000000036894  | 0.309                                                                           | 0           | 0                       | 0.427    | 0.9         | 0.987                                  | 0.9                | 0.847 | 0.999 |       |                   |                |
| CP92    | CP91    | 1857147                 |                         | 1843983           | 9606.ENSP0000000329419 | 0                                                                               | 0           | 0                       | 0        | 0           | 0.826                                  | 0.959              | 0.9   | 0.755 | 0.999 |                   |                |
| HP9A5   | HP9B01  | 1850618                 |                         | 1848102           | 9606.ENSP000000021473  | 0                                                                               | 0           | 0                       | 0        | 0           | 0.965                                  | 0.999              | 0.36  | 0.945 | 0.999 |                   |                |
| EF4C1   | EF4C1   | 1852064                 |                         | 1844314           | 9606.ENSP0000000236025 | 0                                                                               | 0           | 0                       | 0        | 0           | 0.187                                  | 0.9                | 0.976 | 0.999 |       |                   |                |
| ATRVH1  | ATRVH1  | 1853860                 |                         | 1844340           | 9606.ENSP000000032322  | 0                                                                               | 0           | 0                       | 0        | 0           | 0.464                                  | 0.932              | 0.9   | 0.85  | 0.999 |                   |                |
| IM3     | RP9     | 1850884                 |                         | 1843313           | 9606.ENSP000000012681  | 0                                                                               | 0           | 0                       | 0        | 0           | 0.58                                   | 0.931              | 0.9   | 0.921 | 0.998 |                   |                |
| ATP21   | ATP21   | 1847379                 |                         | 1843313           | 9606.ENSP000000027057  | 0                                                                               | 0           | 0                       | 0        | 0           | 0.943                                  | 0.986              | 0.9   | 0.496 | 0.998 |                   |                |
| YE16    | YE16    | 1846731                 |                         | 1842981           | 9606.ENSP000000040586  | 0                                                                               | 0           | 0                       | 0        | 0           | 0.053                                  | 0.965              | 0.9   | 0.625 | 0.998 |                   |                |
| CP91    | CP91    | 1842919                 |                         | 1843983           | 9606.ENSP000000026212  | 0                                                                               | 0           | 0                       | 0        | 0           | 0.27                                   | 0.958              | 0.9   | 0.442 | 0.998 |                   |                |
| TRVH1   | ATRVH01 | 1851860                 |                         | 1847269           | 9606.ENSP000000032322  | 0                                                                               | 0           | 0                       | 0        | 0           | 0.924                                  | 0.986              | 0.9   | 0.824 | 0.998 |                   |                |
| SNR8    | SNR8    | 1861356                 |                         | 1850982           | 9606.ENSP0000000418401 | 0                                                                               | 0           | 0                       | 0        | 0           | 0.122                                  | 0.984              | 0.9   | 0.333 | 0.998 |                   |                |
| CLTC    | CLTC    | 1848064                 |                         | 1843621           | 9606.ENSP000000029122  | 0                                                                               | 0           | 0                       | 0        | 0           | 0.054                                  | 0.985              | 0.9   | 0.829 | 0.998 |                   |                |
| ALB     | HP9B01  | 1852064                 |                         | 1848102           | 9606.ENSP000000032086  | 0                                                                               | 0           | 0                       | 0        | 0           | 0.784                                  | 0.9                | 0.788 | 0.998 |       |                   |                |
| ATP21   | ATP21   | 1850729                 |                         | 1843483           | 9606.ENSP000000025389  | 0                                                                               | 0           | 0                       | 0        | 0           | 0.054                                  | 0.906              | 0.9   | 0.837 | 0.998 |                   |                |
| VAMP3   | VAMP3   | 1852971                 |                         | 1842224           | 9606.ENSP000000036964  | 0                                                                               | 0           | 0                       | 0        | 0           | 0.956                                  | 0.9                | 0.918 | 0.997 | 0.999 |                   |                |
| NP95    | NP92    | 1857348                 |                         | 1843983           | 9606.ENSP000000037059  | 0                                                                               | 0           | 0                       | 0        | 0           | 0.956                                  | 0.9                | 0.845 | 0.997 |       |                   |                |
| EF4E    | EF4C1   | 1861639                 |                         | 1847379           | 9606.ENSP000000042581  | 0                                                                               | 0           | 0                       | 0        | 0           | 0.124                                  | 0.963              | 0.9   | 0.944 | 0.997 |                   |                |
| EF4E    | ATP21   | 1847023                 |                         | 1843313           | 9606.ENSP0000000214414 | 0                                                                               | 0           | 0                       | 0        | 0           | 0.955                                  | 0.955              | 0.402 | 0.951 | 0.994 |                   |                |
| ACN1    | CP92    | 1845462                 |                         | 1843983           | 9606.ENSP0000000264028 | 0                                                                               | 0           | 0                       | 0        | 0           | 0.12                                   | 0.958              | 0.9   | 0.311 | 0.997 |                   |                |
| EGSC10  | SVOL2   | 1856380                 |                         | 1843621           | 9606.ENSP000000036135  | 0                                                                               | 0           | 0                       | 0        | 0           | 0.29                                   | 0.9                | 0.837 | 0.997 |       |                   |                |
| EF4E    | EF4E    | 1861639                 |                         | 1850882           | 9606.ENSP000000042581  | 0                                                                               | 0           | 0                       | 0        | 0           | 0.423                                  | 0.9                | 0.947 | 0.997 |       |                   |                |
| NAPA    | NAPA    | 1850661                 |                         | 1843317           | 9606.ENSP000000026428  | 0                                                                               | 0           | 0                       | 0        | 0           | 0.087                                  | 0.805              | 0.9   | 0.814 | 0.997 |                   |                |
| ARGAP1  | ARG1    | 1847722                 |                         | 1846224           | 9606.ENSP000000014615  | 0                                                                               | 0           | 0                       | 0        | 0           | 0.063                                  | 0.858              | 0.9   | 0.873 | 0.997 |                   |                |
| NCX2    | NCX2    | 1861296                 |                         | 1843313           | 9606.ENSP000000044508  | 0                                                                               | 0           | 0                       | 0        | 0           | 0.99                                   | 0.9                | 0.902 | 0.997 |       |                   |                |
| GB1     | GB1     | 1851351                 |                         | 1846224           | 9606.ENSP000000039000  | 0                                                                               | 0           | 0                       | 0        | 0           | 0.07                                   | 0.853              | 0.9   | 0.744 | 0.996 |                   |                |
| EG2     | EG2     | 1860266                 |                         | 1848445           | 9606.ENSP0000000004001 | 0                                                                               | 0           | 0                       | 0        | 0           | 0                                      | 0.385              | 0.9   | 0.917 | 0.996 |                   |                |
| SV16    | NAPA    | 1854414                 |                         | 1843317           | 9606.ENSP000000036135  | 0                                                                               | 0           | 0                       | 0        | 0           | 0.073                                  | 0.926              | 0.37  | 0.97  | 0.996 |                   |                |
| EN1     | HP9A5   | 1860279                 |                         | 1850618           | 9606.ENSP000000040445  | 0                                                                               | 0           | 0                       | 0        | 0           | 0.05                                   | 0.405              | 0.9   | 0.937 | 0.996 |                   |                |
| VAMP7   | VAMP7   | 1851189                 |                         | 1843983           | 9606.ENSP000000032640  | 0                                                                               | 0           | 0                       | 0        | 0           | 0.916                                  | 0.9                | 0.866 | 0.996 |       |                   |                |
| AT6     | HP9A5   | 1854690                 |                         | 1850618           | 9606.ENSP000000036919  | 0                                                                               | 0           | 0                       | 0        | 0           | 0.049                                  | 0.407              | 0.9   | 0.937 | 0.995 |                   |                |
| SPC3    | SPC11A  | 1861710                 |                         | 1846006           | 9606.ENSP000000047463  | 0                                                                               | 0           | 0                       | 0        | 0           | 0.794                                  | 0.928              | 0.9   | 0.743 | 0.995 |                   |                |
| CT15    | VAMP4   | 1854414                 |                         | 1843435           | 9606.ENSP000000036135  | 0                                                                               | 0           | 0                       | 0        | 0           | 0.673                                  | 0.958              | 0.9   | 0.858 | 0.995 |                   |                |
| GGK2    | YE16    | 1846352                 |                         | 1842981           | 9606.ENSP000000025567  | 0                                                                               | 0           | 0                       | 0        | 0           | 0.015                                  | 0.871              | 0.9   | 0.689 | 0.995 |                   |                |
| SPC3A   | SPC3A   | 1851319                 |                         | 1846873           | 9606.ENSP000000047329  | 0                                                                               | 0           | 0                       | 0        | 0           | 0.728                                  | 0.9                | 0.844 | 0.995 |       |                   |                |
| RP9     | RP9     | 1843313                 |                         | 1843313           | 9606.ENSP000000011654  | 0                                                                               | 0           | 0                       | 0        | 0           | 0.984                                  | 0.9                | 0.941 | 0.994 |       |                   |                |
| EC4     | EC4     | 1857792                 |                         | 1857792           | 9606.ENSP000000037315  | 0                                                                               | 0           | 0                       | 0        | 0           | 0.069                                  | 0.446              | 0.9   | 0.9   | 0.994 |                   |                |
| EN1     | EN1     | 1842979                 |                         | 1843434           | 9606.ENSP000000036135  | 0                                                                               | 0           | 0                       | 0        | 0           | 0.806                                  | 0.9                | 0.876 | 0.994 |       |                   |                |
| UO1     | BE11    | 1862154                 |                         | 1842924           | 9606.ENSP000000044058  | 0                                                                               | 0           | 0                       | 0        | 0           | 0.124                                  | 0.785              | 0.9   | 0.71  | 0.993 |                   |                |
| AT3     | AT4     | 1852083                 |                         | 1851927           | 9606.ENSP000000034832  | 0                                                                               | 0           | 0                       | 0        | 0           | 0.054                                  | 0.632              | 0.9   | 0.843 | 0.993 |                   |                |
| EF4C1   | EF4C1   | 1852064                 |                         | 1848066           | 9606.ENSP000000032086  | 0                                                                               | 0           | 0                       | 0        | 0           | 0.679                                  | 0.9                | 0.807 | 0.993 |       |                   |                |
| ARGAP1  | ARGAP1  | 1846224                 |                         | 184314            | 9606.ENSP000000027102  | 0                                                                               | 0           | 0                       | 0        | 0           | 0.065                                  | 0.496              | 0.9   | 0.882 | 0.993 |                   |                |
| AT6     | AT6     | 1854690                 |                         | 1842534           | 9606.ENSP000000036919  | 0                                                                               | 0           | 0                       | 0        | 0           | 0.047                                  | 0.655              | 0.9   | 0.98  | 0.993 |                   |                |
| SVAP23  | SVAP23  | 1856919                 |                         | 1849373           | 9606.ENSP000000036135  | 0                                                                               | 0           | 0                       | 0        | 0           | 0.869                                  | 0.9                | 0.446 | 0.993 |       |                   |                |
| SVK2    | VAMP7   | 1850619                 |                         | 1845189           | 9606.ENSP000000036304  | 0                                                                               | 0           | 0                       | 0        | 0           | 0.086                                  | 0.838              | 0.9   | 0.973 | 0.992 |                   |                |
| EF4B1   | EF4C1   | 1852358                 |                         | 1852064           | 9606.ENSP000000040801  | 0                                                                               | 0           | 0                       | 0        | 0           | 0.047                                  | 0.8                | 0.9   | 0.929 | 0.992 |                   |                |
| NCX2    | NCX2    | 1861296                 |                         | 1843313           | 9606.ENSP000000044508  | 0                                                                               | 0           | 0                       | 0        | 0           | 0.99                                   | 0.9                | 0.902 | 0.992 |       |                   |                |

|         |         |         |         |                          |                         |       |   |   |   |       |       |       |       |       |
|---------|---------|---------|---------|--------------------------|-------------------------|-------|---|---|---|-------|-------|-------|-------|-------|
| NOP14   | SEV2L2  | 1849808 | 1843261 | 9606.ENP.NOP00000115674  | 9606.ENP.NOP00000238640 | 0     | 0 | 0 | 0 | 0.812 | 0     | 0     | 0     | 0.939 |
| NIAC3   | PDMA    | 1849557 | 1846218 | 9606.ENP.NOP00000261691  | 9606.ENP.NOP00000222227 | 0     | 0 | 0 | 0 | 0.884 | 0.586 | 0.414 | 0     | 0.984 |
| GB1     | CPB1    | 1855151 | 1849383 | 9606.ENP.NOP00000159000  | 9606.ENP.NOP00000249523 | 0     | 0 | 0 | 0 | 0.353 | 0.383 | 0.9   | 0.086 | 0.958 |
| OCRL    | RAB5A   | 1855405 | 1846281 | 9606.ENP.NOP00000180154  | 9606.ENP.NOP00000273947 | 0     | 0 | 0 | 0 | 0.052 | 0.377 | 0.9   | 0.383 | 0.957 |
| EXSC4   | ARF4    | 1857348 | 1849789 | 9606.ENP.NOP00000170589  | 9606.ENP.NOP00000156176 | 0     | 0 | 0 | 0 | 0.82  | 0.108 | 0.957 | 0.108 | 0.957 |
| PARN    | EF4G1   | 1859310 | 1852064 | 9606.ENP.NOP00000187911  | 9606.ENP.NOP00000138620 | 0     | 0 | 0 | 0 | 0.053 | 0     | 0.9   | 0.574 | 0.956 |
| AMED10  | TMED2   | 1864224 | 1845096 | 9606.ENP.NOP00000172102  | 9606.ENP.NOP00000262225 | 0     | 0 | 0 | 0 | 0.18  | 0.325 | 0.9   | 0.299 | 0.956 |
| YH4     | LMAN1   | 1864894 | 1846404 | 9606.ENP.NOP00000103145  | 9606.ENP.NOP00000103147 | 0     | 0 | 0 | 0 | 0.136 | 0.417 | 0.9   | 0.251 | 0.956 |
| PARN    | MRP8    | 1864291 | 1847112 | 9606.ENP.NOP00000273947  | 9606.ENP.NOP00000000412 | 0     | 0 | 0 | 0 | 0.053 | 0     | 0.9   | 0.574 | 0.956 |
| DP2     | DP2     | 1859310 | 1857370 | 9606.ENP.NOP00000187911  | 9606.ENP.NOP00000137375 | 0     | 0 | 0 | 0 | 0.088 | 0     | 0.9   | 0.554 | 0.955 |
| YH4     | STX7    | 1854469 | 1854469 | 9606.ENP.NOP00000158126  | 9606.ENP.NOP00000136618 | 0     | 0 | 0 | 0 | 0.053 | 0.597 | 0.9   | 0.597 | 0.955 |
| VAMP4   | YK16    | 1843436 | 1842981 | 9606.ENP.NOP00000238152  | 9606.ENP.NOP00000232369 | 0     | 0 | 0 | 0 | 0.048 | 0.673 | 0.54  | 0.728 | 0.955 |
| ARF1    | ARF1    | 1851405 | 1849789 | 9606.ENP.NOP00000180154  | 9606.ENP.NOP00000114114 | 0     | 0 | 0 | 0 | 0.056 | 0.233 | 0.954 | 0.233 | 0.954 |
| GB1     | GB1     | 1862154 | 1855151 | 9606.ENP.NOP00000440586  | 9606.ENP.NOP00000139500 | 0     | 0 | 0 | 0 | 0.033 | 0.402 | 0.9   | 0.219 | 0.954 |
| RPS6A3  | CEBPA   | 1857057 | 1848778 | 9606.ENP.NOP00000168884  | 9606.ENP.NOP00000130542 | 0     | 0 | 0 | 0 | 0     | 0     | 0.9   | 0.566 | 0.954 |
| SEC11A  | CPB2    | 1852159 | 1851747 | 9606.ENP.NOP00000147129  | 9606.ENP.NOP00000103119 | 0     | 0 | 0 | 0 | 0.054 | 0     | 0.9   | 0.576 | 0.954 |
| USO1    | ARF1    | 1862154 | 1846224 | 9606.ENP.NOP00000440586  | 9606.ENP.NOP00000272102 | 0     | 0 | 0 | 0 | 0.054 | 0.293 | 0.9   | 0.401 | 0.954 |
| NOP56   | SEV2L2  | 1857348 | 1843261 | 9606.ENP.NOP00000170589  | 9606.ENP.NOP00000233640 | 0     | 0 | 0 | 0 | 0.36  | 0.057 | 0.9   | 0.284 | 0.953 |
| ARFGAP3 | BET1    | 1862154 | 1842224 | 9606.ENP.NOP00000152495  | 9606.ENP.NOP00000225247 | 0     | 0 | 0 | 0 | 0.263 | 0.458 | 0.9   | 0.458 | 0.953 |
| YH4     | TMED2   | 1846678 | 1845096 | 9606.ENP.NOP00000280551  | 9606.ENP.NOP00000262225 | 0     | 0 | 0 | 0 | 0.101 | 0.395 | 0.9   | 0.286 | 0.953 |
| EF4E    | PAP1    | 1861659 | 1848447 | 9606.ENP.NOP0000025561   | 9606.ENP.NOP00000302768 | 0     | 0 | 0 | 0 | 0.115 | 0     | 0.9   | 0.502 | 0.952 |
| H2AK    | NPM1    | 1858252 | 1847863 | 9606.ENP.NOP00000164310  | 9606.ENP.NOP00000276930 | 0     | 0 | 0 | 0 | 0.053 | 0.356 | 0.9   | 0.356 | 0.952 |
| ADH1B1  | CS1B    | 1853457 | 1849378 | 9606.ENP.NOP00000136028  | 9606.ENP.NOP0000011083  | 0     | 0 | 0 | 0 | 0.059 | 0.952 | 0     | 0     | 0.952 |
| NOP56   | SDO1    | 1857348 | 1853230 | 9606.ENP.NOP00000170589  | 9606.ENP.NOP00000148596 | 0     | 0 | 0 | 0 | 0.051 | 0.065 | 0     | 0     | 0.952 |
| SDO1    | SDO1    | 1853230 | 1843325 | 9606.ENP.NOP00000148596  | 9606.ENP.NOP00000115674 | 0     | 0 | 0 | 0 | 0.352 | 0     | 0     | 0     | 0.952 |
| RBP9    | RBP9    | 1853230 | 1843325 | 9606.ENP.NOP00000148596  | 9606.ENP.NOP00000232888 | 0     | 0 | 0 | 0 | 0.052 | 0.052 | 0     | 0     | 0.952 |
| VAMP3   | VAMP3   | 1842224 | 1842224 | 9606.ENP.NOP00000122369  | 9606.ENP.NOP00000154666 | 0     | 0 | 0 | 0 | 0.048 | 0.573 | 0.54  | 0.951 | 0.951 |
| BET1    | BET1    | 1844034 | 1842924 | 9606.ENP.NOP00000251047  | 9606.ENP.NOP00000222547 | 0     | 0 | 0 | 0 | 0.053 | 0     | 0.9   | 0.53  | 0.951 |
| CPB1    | CPB1    | 1854425 | 1843983 | 9606.ENP.NOP00000155629  | 9606.ENP.NOP00000149923 | 0     | 0 | 0 | 0 | 0.127 | 0     | 0.9   | 0.491 | 0.951 |
| GCB2    | GCB2    | 1846678 | 1843032 | 9606.ENP.NOP00000180551  | 9606.ENP.NOP00000125567 | 0     | 0 | 0 | 0 | 0.051 | 0.17  | 0.9   | 0.432 | 0.951 |
| CPB1    | GCB2    | 1849383 | 1843032 | 9606.ENP.NOP00000149523  | 9606.ENP.NOP00000125567 | 0     | 0 | 0 | 0 | 0     | 0.095 | 0.9   | 0.508 | 0.951 |
| EF2     | EF2     | 1850884 | 1849501 | 9606.ENP.NOP00000126981  | 9606.ENP.NOP00000130740 | 0.309 | 0 | 0 | 0 | 0.913 | 0     | 0     | 0.255 | 0.951 |
| LOC1    | LOC1    | 1851770 | 1849173 | 9606.ENP.NOP00000103181  | 9606.ENP.NOP00000110596 | 0     | 0 | 0 | 0 | 0.053 | 0.527 | 0.9   | 0.527 | 0.951 |
| LMAN1   | CTSC    | 1844034 | 1843108 | 9606.ENP.NOP00000151047  | 9606.ENP.NOP00000227266 | 0     | 0 | 0 | 0 | 0.054 | 0     | 0.9   | 0.525 | 0.951 |
| AMED10  | ARF1    | 1864224 | 1846404 | 9606.ENP.NOP00000103145  | 9606.ENP.NOP00000227266 | 0     | 0 | 0 | 0 | 0.054 | 0.396 | 0.189 | 0.595 | 0.951 |
| RAB5A   | RAB5A   | 1846405 | 1846291 | 9606.ENP.NOP00000273947  | 9606.ENP.NOP00000273947 | 0     | 0 | 0 | 0 | 0     | 0     | 0.9   | 0.515 | 0.949 |
| CPB1    | CPB1    | 1862154 | 1843983 | 9606.ENP.NOP00000155629  | 9606.ENP.NOP00000149923 | 0     | 0 | 0 | 0 | 0.46  | 0.066 | 0.9   | 0.112 | 0.949 |
| CPB2    | CPB2    | 1851747 | 1843032 | 9606.ENP.NOP00000180551  | 9606.ENP.NOP00000125567 | 0     | 0 | 0 | 0 | 0.053 | 0.292 | 0.336 | 0.449 | 0.949 |
| USO1    | VAMP3   | 1846291 | 1842224 | 9606.ENP.NOP00000173047  | 9606.ENP.NOP00000154666 | 0     | 0 | 0 | 0 | 0.099 | 0     | 0.9   | 0.477 | 0.948 |
| CPB2    | CPB2    | 1851747 | 1846224 | 9606.ENP.NOP00000126919  | 9606.ENP.NOP00000272102 | 0     | 0 | 0 | 0 | 0.071 | 0.178 | 0.9   | 0.4   | 0.948 |
| GCB2    | GCB2    | 1844034 | 1843032 | 9606.ENP.NOP00000180551  | 9606.ENP.NOP00000125567 | 0     | 0 | 0 | 0 | 0.051 | 0.493 | 0.9   | 0.493 | 0.947 |
| IMP3    | IMP3    | 1850884 | 1849789 | 9606.ENP.NOP00000126981  | 9606.ENP.NOP00000115476 | 0.055 | 0 | 0 | 0 | 0.493 | 0     | 0.9   | 0     | 0.947 |
| NAP3    | YK16    | 1850661 | 1842981 | 9606.ENP.NOP00000124628  | 9606.ENP.NOP00000232369 | 0     | 0 | 0 | 0 | 0.052 | 0.486 | 0.9   | 0     | 0.947 |
| VAMP1   | VAMP1   | 1846405 | 1843108 | 9606.ENP.NOP00000151047  | 9606.ENP.NOP00000132640 | 0     | 0 | 0 | 0 | 0.121 | 0.321 | 0.9   | 0.607 | 0.947 |
| NAP3    | NAP3    | 1850661 | 1842924 | 9606.ENP.NOP00000124628  | 9606.ENP.NOP0000022247  | 0     | 0 | 0 | 0 | 0     | 0.486 | 0.9   | 0.068 | 0.947 |
| STX16   | STX16   | 1853414 | 1850661 | 9606.ENP.NOP00000103183  | 9606.ENP.NOP00000124628 | 0     | 0 | 0 | 0 | 0.095 | 0.67  | 0.9   | 0.9   | 0.947 |
| NAP3    | STX16   | 1851457 | 1851457 | 9606.ENP.NOP00000103183  | 9606.ENP.NOP00000136018 | 0     | 0 | 0 | 0 | 0.053 | 0.057 | 0.9   | 0.481 | 0.947 |
| SHG2L2  | EGFR    | 1857254 | 1844445 | 9606.ENP.NOP00000169981  | 9606.ENP.NOP00000127593 | 0     | 0 | 0 | 0 | 0.073 | 0.336 | 0.9   | 0.221 | 0.946 |
| HPAS    | HPAS    | 1856566 | 1850818 | 9606.ENP.NOP00000136991  | 9606.ENP.NOP00000132473 | 0.309 | 0 | 0 | 0 | 0.054 | 0.234 | 0.9   | 0.689 | 0.946 |
| SEC24D  | LMAN1   | 1846678 | 1844034 | 9606.ENP.NOP00000180551  | 9606.ENP.NOP00000251047 | 0     | 0 | 0 | 0 | 0.163 | 0     | 0.9   | 0.41  | 0.946 |
| SNAP23  | STX16   | 1853414 | 1846404 | 9606.ENP.NOP00000103183  | 9606.ENP.NOP00000149647 | 0     | 0 | 0 | 0 | 0.15  | 0.602 | 0.72  | 0.505 | 0.946 |
| RAB5A   | RAB5A   | 1846405 | 1846404 | 9606.ENP.NOP00000273947  | 9606.ENP.NOP00000103122 | 0     | 0 | 0 | 0 | 0.053 | 0.467 | 0.106 | 0.44  | 0.946 |
| GB1     | CPB2    | 1855151 | 1851747 | 9606.ENP.NOP00000159000  | 9606.ENP.NOP00000132949 | 0     | 0 | 0 | 0 | 0.29  | 0.265 | 0.9   | 0.089 | 0.946 |
| CLTC    | CLTC    | 1855405 | 1846064 | 9606.ENP.NOP00000160154  | 9606.ENP.NOP00000126912 | 0     | 0 | 0 | 0 | 0.071 | 0.415 | 0.9   | 0.13  | 0.946 |
| EXSC1   | IMP3    | 1851369 | 1850884 | 9606.ENP.NOP00000103183  | 9606.ENP.NOP00000136981 | 0     | 0 | 0 | 0 | 0.052 | 0.481 | 0.9   | 0.481 | 0.946 |
| DP2     | EXSC5   | 1857792 | 184281  | 9606.ENP.NOP00000173715  | 9606.ENP.NOP00000121233 | 0     | 0 | 0 | 0 | 0.054 | 0     | 0.9   | 0.466 | 0.945 |
| DNAH4   | HPAS    | 1852327 | 1847834 | 9606.ENP.NOP00000178324  | 9606.ENP.NOP00000129785 | 0.309 | 0 | 0 | 0 | 0.4   | 0.592 | 0.724 | 0.453 | 0.945 |
| H2K     | H2K     | 1858247 | 1846641 | 9606.ENP.NOP00000154794  | 9606.ENP.NOP00000126512 | 0     | 0 | 0 | 0 | 0.055 | 0.278 | 0.9   | 0.368 | 0.945 |
| IG2B    | RAB5A   | 1853441 | 1849383 | 9606.ENP.NOP00000136028  | 9606.ENP.NOP00000173947 | 0     | 0 | 0 | 0 | 0.072 | 0.048 | 0.9   | 0.445 | 0.944 |
| EHNA2   | EHNA2   | 1850828 | 1846064 | 9606.ENP.NOP00000126981  | 9606.ENP.NOP00000126949 | 0     | 0 | 0 | 0 | 0.077 | 0.417 | 0.9   | 0.721 | 0.944 |
| DNAH9   | DNAH9   | 1859893 | 1843959 | 9606.ENP.NOP00000138444  | 9606.ENP.NOP00000146156 | 0.309 | 0 | 0 | 0 | 0.24  | 0.329 | 0.724 | 0.9   | 0.944 |
| RBP9    | SEV2L2  | 1843235 | 1843261 | 9606.ENP.NOP00000132888  | 9606.ENP.NOP00000233640 | 0     | 0 | 0 | 0 | 0.359 | 0.096 | 0.9   | 0.146 | 0.944 |
| BET1    | BET1    | 1851747 | 1842924 | 9606.ENP.NOP00000122369  | 9606.ENP.NOP00000122547 | 0     | 0 | 0 | 0 | 0.048 | 0.292 | 0.9   | 0.216 | 0.944 |
| CPB2    | CPB2    | 1855777 | 1855666 | 9606.ENP.NOP000001381216 | 9606.ENP.NOP00000136143 | 0     | 0 | 0 | 0 | 0.095 | 0.336 | 0.9   | 0.144 | 0.943 |
| SN2     | IG2B    | 1857048 | 1853441 | 9606.ENP.NOP00000168881  | 9606.ENP.NOP00000149437 | 0     | 0 | 0 | 0 | 0.075 | 0.075 | 0.9   | 0.417 | 0.943 |
| CLTC1   | CLTC    | 1855405 | 1850505 | 9606.ENP.NOP00000159000  | 9606.ENP.NOP00000158663 | 0     | 0 | 0 | 0 | 0.167 | 0.757 | 0.9   | 0.481 | 0.943 |
| RAB14   | YHWAH   | 1855997 | 1849183 | 9606.ENP.NOP00000162946  | 9606.ENP.NOP00000130903 | 0     | 0 | 0 | 0 | 0.103 | 0.184 | 0.9   | 0.313 | 0.943 |
| ARF1    | YK16    | 1846224 | 1842981 | 9606.ENP.NOP00000172102  | 9606.ENP.NOP00000123369 | 0     | 0 | 0 | 0 | 0.086 | 0.519 | 0.9   | 0.385 | 0.943 |
| SEC1    | YK16    | 1850661 | 1850661 | 9606.ENP.NOP00000103183  | 9606.ENP.NOP00000136125 | 0.309 | 0 | 0 | 0 | 0.054 | 0.118 | 0.9   | 0.491 | 0.943 |
| DNAH4   | HPAS    | 1852327 | 1847834 | 9606.ENP.NOP00000178324  | 9606.ENP.NOP00000132473 | 0     | 0 | 0 | 0 | 0.92  | 0.274 | 0.9   | 0.391 | 0.943 |
| CLTC    | CLTC    | 1855405 | 1846064 | 9606.ENP.NOP00000160154  | 9606.ENP.NOP00000126912 | 0     | 0 | 0 | 0 | 0.073 | 0.415 | 0.9   | 0.481 | 0.943 |
| ARFGAP1 | BET1    | 1849722 | 1842924 | 9606.ENP.NOP00000114615  | 9606.ENP.NOP00000222547 | 0     | 0 | 0 | 0 | 0     | 0.118 | 0.9   | 0.387 | 0.941 |
| NOP14   | RPT4    | 1849808 | 1849378 | 9606.ENP.NOP00000115674  | 9606.ENP.NOP00000111028 | 0     | 0 | 0 | 0 | 0.054 | 0.397 | 0.9   | 0.088 | 0.941 |
| AMED10  | TMED10  | 1851747 | 1846404 | 9606.ENP.NOP00000103145  | 9606.ENP.NOP00000103145 | 0     | 0 | 0 | 0 | 0.056 | 0.248 | 0.9   | 0.591 | 0.941 |
| GB1     | ARFGAP1 | 1855151 | 1849722 | 9606.ENP.NOP00000159000  | 9606.ENP.NOP00000114615 | 0     | 0 | 0 | 0 | 0.174 | 0     | 0.9   | 0.341 | 0.94  |
| VAMP3   | VAMP3   | 1846291 | 1842224 | 9606.ENP.NOP00000122369  | 9606.ENP.NOP00000154666 | 0     | 0 | 0 | 0 | 0.113 | 0.121 |       |       |       |

|         |         |         |         |                         |                         |       |   |   |   |   |      |       |       |       |   |       |       |       |
|---------|---------|---------|---------|-------------------------|-------------------------|-------|---|---|---|---|------|-------|-------|-------|---|-------|-------|-------|
| RPSK3A3 | AT14    | 1857057 | 1851927 | 9606.ENP.NP00000168884  | 9606.ENP.NP00000138790  | 0     | 0 | 0 | 0 | 0 | 0    | 0     | 0     | 0     | 0 | 0.8   | 0.632 | 0.923 |
| RNN     | EF442   | 1853130 | 1850826 | 9606.ENP.NP00000187911  | 9606.ENP.NP00000138831  | 0     | 0 | 0 | 0 | 0 | 0    | 0     | 0     | 0     | 0 | 0.238 | 0.933 | 0.918 |
| BAG3    | HP50    | 1854947 | 1847834 | 9606.ENP.NP00000158081  | 9606.ENP.NP00000297185  | 0     | 0 | 0 | 0 | 0 | 0    | 0     | 0     | 0     | 0 | 0.165 | 0.9   | 0.146 |
| SECT1A  | GS2R    | 1853139 | 1843032 | 9606.ENP.NP00000147129  | 9606.ENP.NP00000225567  | 0     | 0 | 0 | 0 | 0 | 0    | 0.087 | 0     | 0     | 0 | 0.09  | 0.239 | 0.922 |
| DPN     | DNA18   | 1853139 | 1843032 | 9606.ENP.NP00000178155  | 9606.ENP.NP00000134566  | 0.309 | 0 | 0 | 0 | 0 | 0.84 | 0     | 0     | 0     | 0 | 0.274 | 0.932 | 0.918 |
| AFZM5   | CLTA    | 1847379 | 1843621 | 9606.ENP.NP00000252807  | 9606.ENP.NP00000242285  | 0     | 0 | 0 | 0 | 0 | 0    | 0.151 | 0     | 0     | 0 | 0.071 | 0.9   | 0.136 |
| USO1    | ARFGAP1 | 1862154 | 1840722 | 9606.ENP.NP00000440586  | 9606.ENP.NP00000114615  | 0     | 0 | 0 | 0 | 0 | 0    | 0.082 | 0     | 0     | 0 | 0.116 | 0.9   | 0.142 |
| ECSC4   | RNN     | 1847789 | 1843325 | 9606.ENP.NP00000154458  | 9606.ENP.NP00000123888  | 0     | 0 | 0 | 0 | 0 | 0    | 0.118 | 0     | 0     | 0 | 0.09  | 0.322 | 0.914 |
| USO1    | CO2     | 1862154 | 1845425 | 9606.ENP.NP00000440586  | 9606.ENP.NP00000135629  | 0     | 0 | 0 | 0 | 0 | 0    | 0.118 | 0     | 0     | 0 | 0     | 0.9   | 0.193 |
| ARFGAP1 | AFZB1   | 1847722 | 1840703 | 9606.ENP.NP00000114615  | 9606.ENP.NP00000123888  | 0     | 0 | 0 | 0 | 0 | 0    | 0.085 | 0.169 | 0     | 0 | 0.11  | 0.921 | 0.921 |
| RNN     | EF441   | 1853130 | 1847443 | 9606.ENP.NP00000187911  | 9606.ENP.NP000001278831 | 0     | 0 | 0 | 0 | 0 | 0    | 0.129 | 0     | 0     | 0 | 0.09  | 0.231 | 0.921 |
| RPS14   | EF443   | 1849733 | 1846086 | 9606.ENP.NP00000111028  | 9606.ENP.NP00000269349  | 0     | 0 | 0 | 0 | 0 | 0    | 0.129 | 0     | 0     | 0 | 0.097 | 0.9   | 0.125 |
| ECSC1   | CLTA    | 1847379 | 1843032 | 9606.ENP.NP00000138790  | 9606.ENP.NP00000225567  | 0     | 0 | 0 | 0 | 0 | 0    | 0.087 | 0     | 0     | 0 | 0.1   | 0.9   | 0.921 |
| AT14    | CL2     | 1851927 | 1843055 | 9606.ENP.NP00000138790  | 9606.ENP.NP00000225567  | 0     | 0 | 0 | 0 | 0 | 0    | 0     | 0     | 0     | 0 | 0.95  | 0.921 | 0.921 |
| SRP     | SR1     | 1850982 | 1843739 | 9606.ENP.NP00000128023  | 9606.ENP.NP000001244763 | 0     | 0 | 0 | 0 | 0 | 0    | 0.225 | 0     | 0     | 0 | 0.09  | 0.064 | 0.921 |
| NC7L    | PD46    | 1846718 | 1846224 | 9606.ENP.NP00000175048  | 9606.ENP.NP00000123127  | 0     | 0 | 0 | 0 | 0 | 0    | 0.054 | 0     | 0     | 0 | 0.588 | 0.92  | 0.921 |
| OCRL    | AFZB1   | 1855405 | 1844363 | 9606.ENP.NP00000160154  | 9606.ENP.NP00000255194  | 0     | 0 | 0 | 0 | 0 | 0    | 0.074 | 0.169 | 0     | 0 | 0.09  | 0.09  | 0.92  |
| ST07    | NAPS    | 1854689 | 1850661 | 9606.ENP.NP00000156918  | 9606.ENP.NP00000124628  | 0     | 0 | 0 | 0 | 0 | 0    | 0.084 | 0.807 | 0.54  | 0 | 0.124 | 0.92  | 0.92  |
| HP50    | N7B     | 1850818 | 1845457 | 9606.ENP.NP00000124173  | 9606.ENP.NP00000124055  | 0     | 0 | 0 | 0 | 0 | 0    | 0     | 0     | 0     | 0 | 0.225 | 0.92  | 0.92  |
| ECSC10  | RNN     | 1856380 | 1843325 | 9606.ENP.NP000001366135 | 9606.ENP.NP00000232888  | 0     | 0 | 0 | 0 | 0 | 0    | 0.222 | 0     | 0     | 0 | 0.09  | 0.062 | 0.92  |
| SN2     | AFZB1   | 1857048 | 1843432 | 9606.ENP.NP00000168884  | 9606.ENP.NP00000125194  | 0     | 0 | 0 | 0 | 0 | 0    | 0.118 | 0     | 0     | 0 | 0.084 | 0.9   | 0.148 |
| RNN     | ECSC2   | 1853139 | 1843224 | 9606.ENP.NP00000162946  | 9606.ENP.NP00000123649  | 0     | 0 | 0 | 0 | 0 | 0    | 0.082 | 0.17  | 0.17  | 0 | 0.12  | 0.92  | 0.92  |
| ARFGAP1 | CLTC    | 1847722 | 1846084 | 9606.ENP.NP00000114615  | 9606.ENP.NP00000269122  | 0     | 0 | 0 | 0 | 0 | 0    | 0.072 | 0.17  | 0.17  | 0 | 0.09  | 0.086 | 0.92  |
| CLTC    | CLTC    | 1846445 | 1845189 | 9606.ENP.NP000001289122 | 9606.ENP.NP00000126240  | 0     | 0 | 0 | 0 | 0 | 0    | 0.053 | 0.067 | 0.067 | 0 | 0.194 | 0.919 | 0.919 |
| KDELR3  | ECGR    | 1846445 | 1846084 | 9606.ENP.NP00000175493  | 9606.ENP.NP000001269122 | 0     | 0 | 0 | 0 | 0 | 0    | 0.052 | 0     | 0     | 0 | 0.187 | 0.918 | 0.918 |
| AFZB1   | AFZB1   | 1859221 | 1846224 | 9606.ENP.NP00000138618  | 9606.ENP.NP00000127102  | 0     | 0 | 0 | 0 | 0 | 0    | 0.058 | 0.121 | 0.121 | 0 | 0.09  | 0.242 | 0.919 |
| PANN    | PANN    | 1859310 | 1848447 | 9606.ENP.NP00000138791  | 9606.ENP.NP000001202168 | 0     | 0 | 0 | 0 | 0 | 0    | 0     | 0     | 0     | 0 | 0.231 | 0.919 | 0.919 |
| AFZB1   | AFZB1   | 1847722 | 1845462 | 9606.ENP.NP00000114615  | 9606.ENP.NP00000124628  | 0     | 0 | 0 | 0 | 0 | 0    | 0.154 | 0.063 | 0.09  | 0 | 0.101 | 0.919 | 0.919 |
| NC7D    | ECSC5   | 1848698 | 1842821 | 9606.ENP.NP00000115674  | 9606.ENP.NP00000121233  | 0     | 0 | 0 | 0 | 0 | 0    | 0.23  | 0     | 0     | 0 | 0     | 0.9   | 0.919 |
| SVGL2   | IMP3    | 1850982 | 1843261 | 9606.ENP.NP00000123681  | 9606.ENP.NP00000123840  | 0     | 0 | 0 | 0 | 0 | 0    | 0.086 | 0     | 0     | 0 | 0.09  | 0.919 | 0.919 |
| AFZB1   | CO2     | 1848911 | 1843983 | 9606.ENP.NP000001307078 | 9606.ENP.NP000001249923 | 0     | 0 | 0 | 0 | 0 | 0    | 0.149 | 0.062 | 0.062 | 0 | 0.094 | 0.918 | 0.918 |
| ECGR    | ECGR    | 1847703 | 1846445 | 9606.ENP.NP00000114414  | 9606.ENP.NP00000127593  | 0     | 0 | 0 | 0 | 0 | 0    | 0     | 0.126 | 0     | 0 | 0.142 | 0.918 | 0.918 |
| AFZB1   | VAMP3   | 1846084 | 1842224 | 9606.ENP.NP000001289122 | 9606.ENP.NP00000124646  | 0     | 0 | 0 | 0 | 0 | 0    | 0.071 | 0.082 | 0.082 | 0 | 0.19  | 0.917 | 0.917 |
| IGZB    | AFZB1   | 1853441 | 1843432 | 9606.ENP.NP00000149437  | 9606.ENP.NP000001255194 | 0     | 0 | 0 | 0 | 0 | 0    | 0.181 | 0     | 0     | 0 | 0.09  | 0.081 | 0.918 |
| OCRL    | RNN     | 1853130 | 1844244 | 9606.ENP.NP00000138618  | 9606.ENP.NP00000123681  | 0     | 0 | 0 | 0 | 0 | 0    | 0.053 | 0     | 0     | 0 | 0.21  | 0.917 | 0.917 |
| CO2     | CO2     | 1847789 | 1842924 | 9606.ENP.NP00000149523  | 9606.ENP.NP000001225547 | 0     | 0 | 0 | 0 | 0 | 0    | 0.121 | 0.095 | 0.095 | 0 | 0.09  | 0.902 | 0.918 |
| KDELR3  | TMED2   | 1859221 | 1845096 | 9606.ENP.NP00000138618  | 9606.ENP.NP000001262225 | 0     | 0 | 0 | 0 | 0 | 0    | 0.123 | 0     | 0     | 0 | 0.141 | 0.918 | 0.918 |
| GS2R    | ECSC2   | 1859321 | 1843032 | 9606.ENP.NP00000138618  | 9606.ENP.NP000001232567 | 0     | 0 | 0 | 0 | 0 | 0    | 0.054 | 0     | 0     | 0 | 0.142 | 0.918 | 0.918 |
| SN2     | TMED1   | 1857048 | 1846224 | 9606.ENP.NP00000168884  | 9606.ENP.NP00000127102  | 0     | 0 | 0 | 0 | 0 | 0    | 0.053 | 0.053 | 0.053 | 0 | 0.9   | 0.199 | 0.918 |
| USO1    | TMED2   | 1862154 | 1845096 | 9606.ENP.NP00000440586  | 9606.ENP.NP000001262225 | 0     | 0 | 0 | 0 | 0 | 0    | 0.123 | 0     | 0     | 0 | 0.144 | 0.917 | 0.917 |
| AFZB1   | AFZB1   | 1859221 | 1843739 | 9606.ENP.NP00000123681  | 9606.ENP.NP00000123807  | 0     | 0 | 0 | 0 | 0 | 0    | 0.087 | 0.172 | 0.172 | 0 | 0.09  | 0.917 | 0.917 |
| RNN     | AFZB1   | 1847703 | 1846291 | 9606.ENP.NP00000114414  | 9606.ENP.NP000001273047 | 0     | 0 | 0 | 0 | 0 | 0    | 0.112 | 0     | 0     | 0 | 0.136 | 0.917 | 0.917 |
| TMED2   | CO2     | 1846096 | 1842924 | 9606.ENP.NP000001262225 | 9606.ENP.NP000001222547 | 0     | 0 | 0 | 0 | 0 | 0    | 0.112 | 0     | 0     | 0 | 0.147 | 0.917 | 0.917 |
| KDELR3  | CO2     | 1859321 | 1851147 | 9606.ENP.NP00000138618  | 9606.ENP.NP000001234119 | 0     | 0 | 0 | 0 | 0 | 0    | 0.096 | 0     | 0     | 0 | 0.128 | 0.917 | 0.917 |
| SECT1A  | YK16    | 1853139 | 1842981 | 9606.ENP.NP000001447329 | 9606.ENP.NP000001233369 | 0     | 0 | 0 | 0 | 0 | 0    | 0.049 | 0.068 | 0.068 | 0 | 0.9   | 0.182 | 0.917 |
| ARFGAP1 | CO2     | 1847722 | 1843261 | 9606.ENP.NP00000114615  | 9606.ENP.NP000001262812 | 0     | 0 | 0 | 0 | 0 | 0    | 0.082 | 0.094 | 0.094 | 0 | 0.19  | 0.146 | 0.917 |
| CLTA    | VAMP4   | 1853441 | 1842224 | 9606.ENP.NP00000149437  | 9606.ENP.NP00000124646  | 0     | 0 | 0 | 0 | 0 | 0    | 0.096 | 0.053 | 0.053 | 0 | 0.205 | 0.917 | 0.917 |
| GB1     | DCN1    | 1851151 | 1842114 | 9606.ENP.NP00000159000  | 9606.ENP.NP000001354791 | 0     | 0 | 0 | 0 | 0 | 0    | 0.182 | 0     | 0     | 0 | 0.9   | 0.07  | 0.917 |
| ECSC1   | NC7E    | 1851659 | 1845032 | 9606.ENP.NP00000123681  | 9606.ENP.NP000001236151 | 0     | 0 | 0 | 0 | 0 | 0    | 0.055 | 0     | 0     | 0 | 0.207 | 0.917 | 0.917 |
| ARFGAP3 | CO2     | 1845314 | 1842179 | 9606.ENP.NP000001263245 | 9606.ENP.NP000001262812 | 0     | 0 | 0 | 0 | 0 | 0    | 0.095 | 0.068 | 0.068 | 0 | 0.9   | 0.141 | 0.917 |
| CO2     | TMED2   | 1851147 | 1845096 | 9606.ENP.NP00000123618  | 9606.ENP.NP000001262225 | 0     | 0 | 0 | 0 | 0 | 0    | 0.15  | 0.054 | 0.054 | 0 | 0.09  | 0.917 | 0.917 |
| RNN     | ECSC2   | 1859310 | 1851077 | 9606.ENP.NP00000138791  | 9606.ENP.NP000001386884 | 0     | 0 | 0 | 0 | 0 | 0    | 0.096 | 0.182 | 0.182 | 0 | 0.205 | 0.917 | 0.917 |
| TMED2   | ECSC2   | 1845096 | 1843032 | 9606.ENP.NP000001262225 | 9606.ENP.NP000001225567 | 0     | 0 | 0 | 0 | 0 | 0    | 0.087 | 0     | 0     | 0 | 0.19  | 0.158 | 0.917 |
| KDELR3  | ARFGAP3 | 1859221 | 1843314 | 9606.ENP.NP00000138618  | 9606.ENP.NP000001263245 | 0     | 0 | 0 | 0 | 0 | 0    | 0.055 | 0     | 0     | 0 | 0.198 | 0.916 | 0.916 |
| ARFGAP3 | TMED2   | 1862154 | 1845096 | 9606.ENP.NP00000440586  | 9606.ENP.NP000001262225 | 0     | 0 | 0 | 0 | 0 | 0    | 0.087 | 0.072 | 0.072 | 0 | 0.196 | 0.916 | 0.916 |
| USO1    | AFZB1   | 1859221 | 1845462 | 9606.ENP.NP00000440586  | 9606.ENP.NP00000124628  | 0     | 0 | 0 | 0 | 0 | 0    | 0.131 | 0.094 | 0.094 | 0 | 0.064 | 0.916 | 0.916 |
| CO2     | CO2     | 1848911 | 1843261 | 9606.ENP.NP00000123681  | 9606.ENP.NP000001262812 | 0     | 0 | 0 | 0 | 0 | 0    | 0     | 0.176 | 0     | 0 | 0.097 | 0.916 | 0.916 |
| CL2     | CL2     | 1856611 | 1843953 | 9606.ENP.NP0000011125   | 9606.ENP.NP000001278831 | 0     | 0 | 0 | 0 | 0 | 0    | 0.125 | 0     | 0     | 0 | 0.119 | 0.916 | 0.916 |
| TMED10  | BE11    | 1848974 | 1842924 | 9606.ENP.NP00000103145  | 9606.ENP.NP000001222547 | 0     | 0 | 0 | 0 | 0 | 0    | 0.125 | 0     | 0     | 0 | 0.119 | 0.916 | 0.916 |
| ECSC5   | ARFGAP3 | 1859221 | 1843621 | 9606.ENP.NP00000123681  | 9606.ENP.NP00000127102  | 0     | 0 | 0 | 0 | 0 | 0    | 0.088 | 0.056 | 0.056 | 0 | 0.184 | 0.916 | 0.916 |
| CLTA    | VAMP4   | 1846445 | 1843436 | 9606.ENP.NP00000142685  | 9606.ENP.NP00000126152  | 0     | 0 | 0 | 0 | 0 | 0    | 0.096 | 0.053 | 0.053 | 0 | 0.194 | 0.916 | 0.916 |
| AT14    | IGZB1   | 1851927 | 1848447 | 9606.ENP.NP00000138790  | 9606.ENP.NP000001275325 | 0     | 0 | 0 | 0 | 0 | 0    | 0     | 0     | 0     | 0 | 0.202 | 0.916 | 0.916 |
| ECGR    | CLTA    | 1845405 | 1846445 | 9606.ENP.NP00000160154  | 9606.ENP.NP000001275325 | 0     | 0 | 0 | 0 | 0 | 0    | 0     | 0     | 0     | 0 | 0.199 | 0.916 | 0.916 |
| IGZB    | VAMP7   | 1853441 | 1845189 | 9606.ENP.NP00000149437  | 9606.ENP.NP00000126240  | 0     | 0 | 0 | 0 | 0 | 0    | 0.074 | 0     | 0     | 0 | 0.168 | 0.916 | 0.916 |
| AFZB1   | CLTA    | 1845323 | 1843621 | 9606.ENP.NP00000156370  | 9606.ENP.NP00000124285  | 0     | 0 | 0 | 0 | 0 | 0    | 0.109 | 0.071 | 0.071 | 0 | 0.095 | 0.915 | 0.915 |
| NC7E    | AFZB1   | 1846445 | 1843739 | 9606.ENP.NP00000123681  | 9606.ENP.NP000001232195 | 0     | 0 | 0 | 0 |   |      |       |       |       |   |       |       |       |

|        |         |         |         |                         |                        |   |   |   |       |       |       |       |       |       |
|--------|---------|---------|---------|-------------------------|------------------------|---|---|---|-------|-------|-------|-------|-------|-------|
| EF401  | CNO2    | 1852064 | 1843182 | 9606.ENP.N00000038020   | 9606.ENP.N00000029195  | 0 | 0 | 0 | 0     | 0.004 | 0     | 0.0   | 0.091 | 0.006 |
| CFPE   | YK16    | 1847918 | 1842961 | 9606.ENP.N00000032812   | 9606.ENP.N00000023369  | 0 | 0 | 0 | 0     | 0.004 | 0.027 | 0.063 | 0.006 | 0.006 |
| EGFR   | VAMP7   | 1846445 | 1845189 | 9606.ENP.N00000027583   | 9606.ENP.N00000026240  | 0 | 0 | 0 | 0     | 0     | 0     | 0.0   | 0.1   | 0.006 |
| KIF5B  | TMED2   | 1848911 | 1845095 | 9606.ENP.N00000030708   | 9606.ENP.N00000026225  | 0 | 0 | 0 | 0     | 0.009 | 0     | 0.0   | 0     | 0.006 |
| KDC5C1 | RP514   | 1853348 | 1843317 | 9606.ENP.N00000031933   | 9606.ENP.N00000031128  | 0 | 0 | 0 | 0     | 0.012 | 0     | 0.0   | 0.046 | 0.006 |
| COG2   | YK16    | 1854225 | 1842981 | 9606.ENP.N00000035529   | 9606.ENP.N000000223369 | 0 | 0 | 0 | 0     | 0.052 | 0     | 0.0   | 0.093 | 0.006 |
| ACIN1  | CEPE    | 1854425 | 1845442 | 9606.ENP.N00000035529   | 9606.ENP.N00000024028  | 0 | 0 | 0 | 0     | 0.09  | 0     | 0.0   | 0     | 0.005 |
| CD31   | CPE     | 1845217 | 1845217 | 9606.ENP.N00000044058   | 9606.ENP.N00000026112  | 0 | 0 | 0 | 0     | 0.073 | 0     | 0.0   | 0.054 | 0.005 |
| ZW10   | ZW10    | 1848911 | 1842389 | 9606.ENP.N00000030708   | 9606.ENP.N000000200135 | 0 | 0 | 0 | 0     | 0.004 | 0     | 0.0   | 0.081 | 0.005 |
| SNK2   | OCRL    | 1853748 | 1853453 | 9606.ENP.N00000036831   | 9606.ENP.N000000360154 | 0 | 0 | 0 | 0     | 0.055 | 0     | 0.0   | 0.076 | 0.005 |
| OCRL   | VAMP7   | 1853450 | 1845189 | 9606.ENP.N00000030714   | 9606.ENP.N00000026240  | 0 | 0 | 0 | 0     | 0.004 | 0     | 0.0   | 0.066 | 0.005 |
| GB1    | KIF5B   | 1853151 | 1848911 | 9606.ENP.N00000035900   | 9606.ENP.N000000307078 | 0 | 0 | 0 | 0     | 0.096 | 0     | 0.0   | 0     | 0.005 |
| VAMP4  | OCRL    | 1853450 | 1843436 | 9606.ENP.N00000036014   | 9606.ENP.N00000026132  | 0 | 0 | 0 | 0     | 0.004 | 0     | 0.0   | 0.067 | 0.005 |
| SHG2   | VAMP4   | 1857254 | 1843436 | 9606.ENP.N00000036981   | 9606.ENP.N000000236192 | 0 | 0 | 0 | 0     | 0.055 | 0     | 0.0   | 0.082 | 0.005 |
| RP514  | SKC1    | 1849373 | 1843317 | 9606.ENP.N000000311028  | 9606.ENP.N000000233025 | 0 | 0 | 0 | 0     | 0.004 | 0     | 0.0   | 0     | 0.005 |
| AP33   | VAMP4   | 1853323 | 1843436 | 9606.ENP.N0000003052370 | 9606.ENP.N00000026132  | 0 | 0 | 0 | 0     | 0.004 | 0     | 0.0   | 0.066 | 0.005 |
| RP514  | SHG2    | 1849373 | 1843261 | 9606.ENP.N000000311028  | 9606.ENP.N000000239640 | 0 | 0 | 0 | 0     | 0.054 | 0     | 0.0   | 0.081 | 0.005 |
| EXSC10 | IMP3    | 1850580 | 1850384 | 9606.ENP.N000000366135  | 9606.ENP.N000000326981 | 0 | 0 | 0 | 0     | 0.074 | 0     | 0.0   | 0.063 | 0.005 |
| CBR8   | HSP90B1 | 1847728 | 1848502 | 9606.ENP.N000000255422  | 9606.ENP.N000000229317 | 0 | 0 | 0 | 0     | 0     | 0     | 0.0   | 0.089 | 0.005 |
| TMED10 | TMED10  | 1848911 | 1848494 | 9606.ENP.N000000307078  | 9606.ENP.N000000303145 | 0 | 0 | 0 | 0     | 0.088 | 0     | 0.0   | 0     | 0.005 |
| AFB1   | MGR     | 1847102 | 1842110 | 9606.ENP.N000000314414  | 9606.ENP.N000000000412 | 0 | 0 | 0 | 0     | 0     | 0     | 0.0   | 0.091 | 0.005 |
| OCRL   | NAPA    | 1853450 | 1845337 | 9606.ENP.N000000308154  | 9606.ENP.N000000263354 | 0 | 0 | 0 | 0     | 0.074 | 0.048 | 0.05  | 0.02  | 0.005 |
| VAMP3  | AP33    | 1845323 | 1842224 | 9606.ENP.N000000263270  | 9606.ENP.N000000054666 | 0 | 0 | 0 | 0     | 0.068 | 0     | 0.0   | 0.066 | 0.005 |
| TMED2  | TMED2   | 1853151 | 1845095 | 9606.ENP.N00000035900   | 9606.ENP.N00000026225  | 0 | 0 | 0 | 0     | 0     | 0.08  | 0.0   | 0.049 | 0.005 |
| GB1    | KDELR3  | 1853348 | 1850221 | 9606.ENP.N00000044058   | 9606.ENP.N000000386918 | 0 | 0 | 0 | 0     | 0     | 0     | 0     | 0.049 | 0.004 |
| COG2   | COG2    | 1853474 | 1854425 | 9606.ENP.N00000036981   | 9606.ENP.N000000355629 | 0 | 0 | 0 | 0     | 0.054 | 0     | 0.0   | 0.068 | 0.004 |
| LD3A   | FUS     | 1846163 | 1844217 | 9606.ENP.N00000044058   | 9606.ENP.N000000254108 | 0 | 0 | 0 | 0     | 0.082 | 0     | 0.0   | 0     | 0.004 |
| AP33   | NAPA    | 1850729 | 1845337 | 9606.ENP.N000000325369  | 9606.ENP.N000000263354 | 0 | 0 | 0 | 0     | 0.073 | 0     | 0.0   | 0.05  | 0.004 |
| YIF6   | AFG1    | 1861304 | 1858195 | 9606.ENP.N000000041753  | 9606.ENP.N000000337148 | 0 | 0 | 0 | 0     | 0.069 | 0     | 0.0   | 0.052 | 0.004 |
| SHG2   | AP33    | 1853323 | 1845323 | 9606.ENP.N00000036981   | 9606.ENP.N000000263270 | 0 | 0 | 0 | 0     | 0.073 | 0     | 0.0   | 0.081 | 0.004 |
| CLTA   | MARK1   | 1849621 | 1845152 | 9606.ENP.N000000242285  | 9606.ENP.N000000215832 | 0 | 0 | 0 | 0     | 0     | 0.049 | 0.05  | 0.075 | 0.004 |
| VAMP4  | CPE     | 1854425 | 1843436 | 9606.ENP.N00000035529   | 9606.ENP.N000000236192 | 0 | 0 | 0 | 0     | 0.047 | 0     | 0.0   | 0.083 | 0.004 |
| KIF18  | ZW10    | 1845440 | 1842389 | 9606.ENP.N00000030714   | 9606.ENP.N000000200135 | 0 | 0 | 0 | 0     | 0.004 | 0     | 0.0   | 0.07  | 0.004 |
| EF4A1  | CNO2    | 1847443 | 1843182 | 9606.ENP.N00000039831   | 9606.ENP.N00000029195  | 0 | 0 | 0 | 0     | 0.065 | 0     | 0.0   | 0.061 | 0.004 |
| EF4A4  | FUS     | 1846986 | 1844217 | 9606.ENP.N00000030708   | 9606.ENP.N000000234108 | 0 | 0 | 0 | 0     | 0.054 | 0     | 0.0   | 0.074 | 0.004 |
| CPD2   | KIF5B   | 1853147 | 1848911 | 9606.ENP.N000000329419  | 9606.ENP.N000000307078 | 0 | 0 | 0 | 0     | 0.086 | 0     | 0.0   | 0     | 0.004 |
| EXSC2  | CDG2    | 1857792 | 1855466 | 9606.ENP.N000000373715  | 9606.ENP.N000000381433 | 0 | 0 | 0 | 0     | 0.063 | 0     | 0.0   | 0.067 | 0.004 |
| CD31   | DCTN1   | 1854219 | 1847824 | 9606.ENP.N00000044058   | 9606.ENP.N00000026132  | 0 | 0 | 0 | 0     | 0.058 | 0     | 0.0   | 0.061 | 0.004 |
| AT3    | XBPI    | 1852803 | 1842534 | 9606.ENP.N000000344352  | 9606.ENP.N000000216037 | 0 | 0 | 0 | 0     | 0     | 0     | 0.0   | 0.526 | 0.004 |
| DCTN1  | BE11    | 1854219 | 1842924 | 9606.ENP.N000000354791  | 9606.ENP.N000000222547 | 0 | 0 | 0 | 0     | 0     | 0     | 0.0   | 0.087 | 0.004 |
| ZW10   | ZW10    | 1845440 | 1842389 | 9606.ENP.N00000030714   | 9606.ENP.N000000200135 | 0 | 0 | 0 | 0     | 0.004 | 0     | 0.0   | 0.08  | 0.004 |
| RAB5A  | AP33    | 1846291 | 1845323 | 9606.ENP.N000000273947  | 9606.ENP.N000000263270 | 0 | 0 | 0 | 0     | 0.058 | 0     | 0.0   | 0.066 | 0.004 |
| EXSC2  | RP514   | 1853456 | 1849373 | 9606.ENP.N00000031413   | 9606.ENP.N000000311028 | 0 | 0 | 0 | 0     | 0.085 | 0     | 0.0   | 0     | 0.004 |
| AFGAP1 | AP33    | 1853323 | 1850729 | 9606.ENP.N000000308154  | 9606.ENP.N000000325369 | 0 | 0 | 0 | 0     | 0.053 | 0     | 0.0   | 0.065 | 0.004 |
| DNAC3  | AFGAP1  | 1849722 | 1845323 | 9606.ENP.N000000314615  | 9606.ENP.N000000263270 | 0 | 0 | 0 | 0     | 0.054 | 0.061 | 0.0   | 0     | 0.003 |
| OCRL   | EF2AK3  | 1853557 | 1848911 | 9606.ENP.N00000036981   | 9606.ENP.N000000307235 | 0 | 0 | 0 | 0     | 0.049 | 0.16  | 0.0   | 0.297 | 0.003 |
| IF2R   | COG2    | 1849621 | 1845022 | 9606.ENP.N000000242285  | 9606.ENP.N000000225367 | 0 | 0 | 0 | 0     | 0.075 | 0     | 0.0   | 0.053 | 0.003 |
| AFGAP1 | KIF5B   | 1849722 | 1848911 | 9606.ENP.N000000314615  | 9606.ENP.N000000307078 | 0 | 0 | 0 | 0     | 0.073 | 0     | 0.0   | 0.043 | 0.003 |
| EF4A3  | EF4A3   | 1845294 | 1846066 | 9606.ENP.N00000044058   | 9606.ENP.N000000263349 | 0 | 0 | 0 | 0     | 0.054 | 0.05  | 0.0   | 0.05  | 0.003 |
| NAPA   | AFB1    | 1845337 | 1844363 | 9606.ENP.N000000263354  | 9606.ENP.N000000255194 | 0 | 0 | 0 | 0     | 0.054 | 0     | 0.0   | 0.063 | 0.003 |
| YHWA2  | YHWA2   | 1850677 | 1849183 | 9606.ENP.N000000381216  | 9606.ENP.N000000305953 | 0 | 0 | 0 | 0     | 0.073 | 0     | 0.0   | 0     | 0.003 |
| COG4   | COG4    | 1854425 | 1843436 | 9606.ENP.N00000035529   | 9606.ENP.N000000349305 | 0 | 0 | 0 | 0     | 0.053 | 0     | 0.0   | 0.062 | 0.003 |
| AP33   | AP33    | 1850729 | 1845323 | 9606.ENP.N000000325369  | 9606.ENP.N000000263270 | 0 | 0 | 0 | 0.007 | 0.057 | 0     | 0.0   | 0.255 | 0.003 |
| SHG2   | VAMP7   | 1857254 | 1845189 | 9606.ENP.N00000036981   | 9606.ENP.N00000026240  | 0 | 0 | 0 | 0     | 0.053 | 0     | 0.0   | 0.061 | 0.003 |
| NKX2   | NKX2    | 1853441 | 1850661 | 9606.ENP.N000000249437  | 9606.ENP.N000000234628 | 0 | 0 | 0 | 0     | 0.054 | 0.055 | 0.0   | 0.052 | 0.003 |
| CNO2   | EF4A2   | 1862294 | 1850826 | 9606.ENP.N000000445058  | 9606.ENP.N000000326281 | 0 | 0 | 0 | 0     | 0.054 | 0.05  | 0.0   | 0.056 | 0.003 |
| DCTN1  | GGK2    | 1854219 | 1843022 | 9606.ENP.N000000354791  | 9606.ENP.N000000225567 | 0 | 0 | 0 | 0     | 0     | 0     | 0.0   | 0.074 | 0.003 |
| NAPA   | CPB1    | 1845337 | 1845981 | 9606.ENP.N000000363354  | 9606.ENP.N000000249923 | 0 | 0 | 0 | 0     | 0.053 | 0     | 0.0   | 0.063 | 0.003 |
| AP33   | MGR     | 1845323 | 1842110 | 9606.ENP.N000000263270  | 9606.ENP.N000000000412 | 0 | 0 | 0 | 0     | 0     | 0     | 0     | 0.075 | 0.003 |
| AP33   | ATP2B1  | 1850729 | 1842727 | 9606.ENP.N00000036981   | 9606.ENP.N000000226807 | 0 | 0 | 0 | 0     | 0.054 | 0.063 | 0.0   | 0     | 0.003 |
| IF2R   | AP33    | 1853441 | 1845323 | 9606.ENP.N00000027583   | 9606.ENP.N000000263270 | 0 | 0 | 0 | 0     | 0     | 0     | 0     | 0.076 | 0.003 |
| KIF18  | COPE    | 1845440 | 1845217 | 9606.ENP.N00000044058   | 9606.ENP.N000000262812 | 0 | 0 | 0 | 0     | 0     | 0     | 0.0   | 0.076 | 0.003 |
| CD31   | PAF1    | 1845294 | 1848447 | 9606.ENP.N00000044058   | 9606.ENP.N000000263349 | 0 | 0 | 0 | 0     | 0.058 | 0     | 0.0   | 0.05  | 0.003 |
| NAPA   | TMED2   | 1845337 | 1845095 | 9606.ENP.N000000263354  | 9606.ENP.N00000026225  | 0 | 0 | 0 | 0     | 0.053 | 0     | 0.0   | 0.065 | 0.003 |
| TMED10 | CTSC    | 1848494 | 1843108 | 9606.ENP.N000000303145  | 9606.ENP.N000000227266 | 0 | 0 | 0 | 0     | 0.053 | 0     | 0.0   | 0.052 | 0.002 |
| KIF5B  | MARK1   | 1853754 | 1845219 | 9606.ENP.N00000036981   | 9606.ENP.N000000315832 | 0 | 0 | 0 | 0     | 0.053 | 0     | 0.0   | 0.054 | 0.002 |
| KIF5B  | EXSC1   | 1858577 | 1855389 | 9606.ENP.N000000381216  | 9606.ENP.N000000359399 | 0 | 0 | 0 | 0     | 0     | 0     | 0.0   | 0.061 | 0.002 |
| KIF5B  | AFGAP1  | 1848911 | 1845314 | 9606.ENP.N00000030708   | 9606.ENP.N000000263245 | 0 | 0 | 0 | 0     | 0.084 | 0     | 0.0   | 0     | 0.002 |
| GOLGA4 | GOLC    | 1854225 | 1848488 | 9606.ENP.N000000354791  | 9606.ENP.N000000261324 | 0 | 0 | 0 | 0     | 0.053 | 0     | 0.0   | 0.06  | 0.002 |
| SHG2   | SNK2    | 1857254 | 1857048 | 9606.ENP.N00000036981   | 9606.ENP.N00000036831  | 0 | 0 | 0 | 0     | 0.053 | 0     | 0.0   | 0.061 | 0.002 |
| VAMP4  | VAMP4   | 1845440 | 1843436 | 9606.ENP.N00000035529   | 9606.ENP.N000000236192 | 0 | 0 | 0 | 0     | 0.054 | 0     | 0.0   | 0.061 | 0.002 |
| GB1    | CLTA    | 1853151 | 1843621 | 9606.ENP.N00000031933   | 9606.ENP.N000000242285 | 0 | 0 | 0 | 0     | 0     | 0     | 0.0   | 0.06  | 0.002 |
| AFG1   | MGR     | 1853105 | 1842110 | 9606.ENP.N000000377148  | 9606.ENP.N000000000412 | 0 | 0 | 0 | 0     | 0     | 0     | 0.0   | 0.064 | 0.002 |
| DCTN1  | YK16    | 1854219 | 1842961 | 9606.ENP.N00000032812   | 9606.ENP.N00000023369  | 0 | 0 | 0 | 0     | 0.004 | 0     | 0.0   | 0.054 | 0.002 |
| GB1    | KIF18   | 1853151 | 1845440 | 9606.ENP.N00000031933   | 9606.ENP.N000000263934 | 0 | 0 | 0 | 0     | 0.066 | 0     | 0.0   | 0     | 0.002 |
| SEC13A | AP33    | 1853151 | 1845323 | 9606.ENP.N00000036981   | 9606.ENP.N000000263270 | 0 | 0 | 0 | 0     | 0.061 | 0     | 0.0   | 0.041 | 0.002 |
| KIF5B  | ACIN1   | 1845440 | 1845440 | 9606.ENP.N00000030714   | 9606.ENP.N000000263270 | 0 | 0 | 0 | 0     | 0.066 | 0     | 0.0   | 0     | 0.002 |
| ACIN1  | DCTN1   | 1854219 | 1845440 | 9606.ENP.N00000030714   | 9606.ENP.N000000263934 | 0 | 0 | 0 | 0     | 0.067 | 0     | 0.0   |       |       |
