# Supplementary material for: Meta-Analysis of Polymyositis and Dermatomyositis Microarray Data Reveals Novel Genetic Biomarkers
Source: MDPI journal article supplement (doi:10.3390/genes10110864), 2019-10-30
Supplement: s1 [file s1]

Supplementary Table 5. Detected SNPs and eGenes in not sun-exposed skin tissue.

| gene            | SNP                    | GTEX_p_value | p_value     | rs_id_dbSNP142_GRCh37p13 | external_gene_name | description                                                                                         |
|-----------------|------------------------|--------------|-------------|--------------------------|--------------------|-----------------------------------------------------------------------------------------------------|
| ENSG00000146833 | 7.99478804_T_C_b37     | 1.00E-10     | 2.00E-06    | rs2572019                | TRIM4              | tripartite motif containing 4 [Source:HGNC Symbol;Acc:16275]                                        |
| ENSG00000146221 | 6.44285376_G_A_b37     | 5.26E-05     | 4.00E-06    | rs2396242                | TCTE1              | t-complex-associated-testis-expressed 1 [Source:HGNC Symbol;Acc:11693]                              |
| ENSG00000146833 | 7.99477524_G_A_b37     | 8.05E-11     | 4.00E-06    | rs2527926                | TRIM4              | tripartite motif containing 4 [Source:HGNC Symbol;Acc:16275]                                        |
| ENSG00000146833 | 7.99479638_G_A_b37     | 1.53E-11     | 4.00E-06    | rs2527925                | TRIM4              | tripartite motif containing 4 [Source:HGNC Symbol;Acc:16275]                                        |
| ENSG00000136169 | 13.50002977_C_CATA_b37 | 6.45E-05     | 4.00E-06    | rs66884685               | SETDB2             | SET domain, bifurcated 2 [Source:HGNC Symbol;Acc:20263]                                             |
| ENSG00000146833 | 7.99473229_A_G_b37     | 1.02E-08     | 5.00E-06    | rs2572024                | TRIM4              | tripartite motif containing 4 [Source:HGNC Symbol;Acc:16275]                                        |
| ENSG00000146833 | 7.99520082_C_T_b37     | 7.36E-11     | 7.00E-06    | rs2571991                | TRIM4              | tripartite motif containing 4 [Source:HGNC Symbol;Acc:16275]                                        |
| ENSG00000146833 | 7.99499872_A_T_b37     | 1.50E-11     | 8.00E-06    | rs2527913                | TRIM4              | tripartite motif containing 4 [Source:HGNC Symbol;Acc:16275]                                        |
| ENSG00000146833 | 7.99501313_A_T_b37     | 1.50E-11     | 8.00E-06    | rs2572003                | TRIM4              | tripartite motif containing 4 [Source:HGNC Symbol;Acc:16275]                                        |
| ENSG00000146833 | 7.99511372_A_G_b37     | 1.50E-11     | 8.00E-06    | rs2571998                | TRIM4              | tripartite motif containing 4 [Source:HGNC Symbol;Acc:16275]                                        |
| ENSG00000146833 | 7.99519916_A_G_b37     | 1.50E-11     | 8.00E-06    | rs2571992                | TRIM4              | tripartite motif containing 4 [Source:HGNC Symbol;Acc:16275]                                        |
| ENSG00000146833 | 7.99483731_CTT_C_b37   | 2.56E-11     | 9.00E-06    | rs58306841               | TRIM4              | tripartite motif containing 4 [Source:HGNC Symbol;Acc:16275]                                        |
| ENSG00000146833 | 7.99484295_G_A_b37     | 1.54E-11     | 9.00E-06    | rs2572013                | TRIM4              | tripartite motif containing 4 [Source:HGNC Symbol;Acc:16275]                                        |
| ENSG00000146833 | 7.99490956_A_T_b37     | 1.50E-11     | 9.00E-06    | rs2572008                | TRIM4              | tripartite motif containing 4 [Source:HGNC Symbol;Acc:16275]                                        |
| ENSG00000146833 | 7.99494030_G_A_b37     | 1.50E-11     | 9.00E-06    | rs2572005                | TRIM4              | tripartite motif containing 4 [Source:HGNC Symbol;Acc:16275]                                        |
| ENSG00000146833 | 7.99494513_C_T_b37     | 1.75E-11     | 9.00E-06    | rs2527919                | TRIM4              | tripartite motif containing 4 [Source:HGNC Symbol;Acc:16275]                                        |
| ENSG00000146833 | 7.99500911_A_G_b37     | 1.50E-11     | 9.00E-06    | rs2247761                | TRIM4              | tripartite motif containing 4 [Source:HGNC Symbol;Acc:16275]                                        |
| ENSG00000146833 | 7.99518271_C_A_b37     | 2.47E-11     | 9.00E-06    | rs2571994                | TRIM4              | tripartite motif containing 4 [Source:HGNC Symbol;Acc:16275]                                        |
| ENSG00000146833 | 7.99519575_T_C_b37     | 1.50E-11     | 9.00E-06    | rs2571993                | TRIM4              | tripartite motif containing 4 [Source:HGNC Symbol;Acc:16275]                                        |
| ENSG00000136169 | 13.50044981_A_G_b37    | 5.42E-05     | 9.00E-06    | rs7994566                | SETDB2             | SET domain, bifurcated 2 [Source:HGNC Symbol;Acc:20263]                                             |
| ENSG00000146833 | 7.99481492_A_C_b37     | 1.53E-11     | 1.00E-05    | rs2572015                | TRIM4              | tripartite motif containing 4 [Source:HGNC Symbol;Acc:16275]                                        |
| ENSG00000146833 | 7.99521448_C_T_b37     | 1.50E-11     | 1.00E-05    | rs2527907                | TRIM4              | tripartite motif containing 4 [Source:HGNC Symbol;Acc:16275]                                        |
| ENSG00000146833 | 7.99525112_A_T_b37     | 1.45E-10     | 1.00E-05    | rs2527901                | TRIM4              | tripartite motif containing 4 [Source:HGNC Symbol;Acc:16275]                                        |
| ENSG00000146833 | 7.99480193_T_C_b37     | 1.53E-11     | 1.10E-05    | rs2572018                | TRIM4              | tripartite motif containing 4 [Source:HGNC Symbol;Acc:16275]                                        |
| ENSG00000146833 | 7.99484473_G_A_b37     | 1.53E-11     | 1.10E-05    | rs2572012                | TRIM4              | tripartite motif containing 4 [Source:HGNC Symbol;Acc:16275]                                        |
| ENSG00000146833 | 7.99493811_G_A_b37     | 1.50E-11     | 1.10E-05    | rs2572006                | TRIM4              | tripartite motif containing 4 [Source:HGNC Symbol;Acc:16275]                                        |
| ENSG00000146833 | 7.99512224_G_T_b37     | 1.50E-11     | 1.10E-05    | rs2527909                | TRIM4              | tripartite motif containing 4 [Source:HGNC Symbol;Acc:16275]                                        |
| ENSG00000146833 | 7.99514417_A_C_b37     | 1.50E-11     | 1.10E-05    | rs2571997                | TRIM4              | tripartite motif containing 4 [Source:HGNC Symbol;Acc:16275]                                        |
| ENSG00000146833 | 7.99498499_A_T_b37     | 1.50E-11     | 1.20E-05    | rs10808114               | TRIM4              | tripartite motif containing 4 [Source:HGNC Symbol;Acc:16275]                                        |
| ENSG00000146833 | 7.99521698_C_T_b37     | 1.50E-11     | 1.20E-05    | rs2527906                | TRIM4              | tripartite motif containing 4 [Source:HGNC Symbol;Acc:16275]                                        |
| ENSG00000146833 | 7.99529181_A_G_b37     | 2.07E-11     | 1.20E-05    | rs2527899                | TRIM4              | tripartite motif containing 4 [Source:HGNC Symbol;Acc:16275]                                        |
| ENSG00000146833 | 7.99537733_G_A_b37     | 1.90E-05     | 1.20E-05    | rs11979058               | TRIM4              | tripartite motif containing 4 [Source:HGNC Symbol;Acc:16275]                                        |
| ENSG00000136169 | 13.50020280_C_G_b37    | 7.48E-05     | 1.20E-05    | rs61959992               | SETDB2             | SET domain, bifurcated 2 [Source:HGNC Symbol;Acc:20263]                                             |
| ENSG00000146833 | 7.99488940_A_T_b37     | 1.48E-11     | 1.30E-05    | rs1048705                | TRIM4              | tripartite motif containing 4 [Source:HGNC Symbol;Acc:16275]                                        |
| ENSG00000146833 | 7.99498018_A_C_b37     | 1.50E-11     | 1.30E-05    | rs2527915                | TRIM4              | tripartite motif containing 4 [Source:HGNC Symbol;Acc:16275]                                        |
| ENSG00000146833 | 7.99451283_T_G_b37     | 5.28E-05     | 1.40E-05    | rs523265                 | TRIM4              | tripartite motif containing 4 [Source:HGNC Symbol;Acc:16275]                                        |
| ENSG00000146833 | 7.99492756_A_G_b37     | 1.50E-11     | 1.40E-05    | rs2527922                | TRIM4              | tripartite motif containing 4 [Source:HGNC Symbol;Acc:16275]                                        |
| ENSG00000146833 | 7.99510850_A_T_b37     | 1.54E-11     | 1.50E-05    | rs2571999                | TRIM4              | tripartite motif containing 4 [Source:HGNC Symbol;Acc:16275]                                        |
| ENSG00000120805 | 12.101690273_C_T_b37   | 1.72E-05     | 1.50E-05    | rs7296602                | ARL1               | ADP-ribosylation factor-like 1 [Source:HGNC Symbol;Acc:692]                                         |
| ENSG00000136169 | 13.50057996_C_T_b37    | 2.94E-05     | 1.50E-05    | rs9568219                | SETDB2             | SET domain, bifurcated 2 [Source:HGNC Symbol;Acc:20263]                                             |
| ENSG00000146833 | 7.99488543_C_T_b37     | 1.50E-11     | 1.60E-05    | rs2572010                | TRIM4              | tripartite motif containing 4 [Source:HGNC Symbol;Acc:16275]                                        |
| ENSG00000146833 | 7.99493270_G_C_b37     | 1.49E-11     | 1.70E-05    | rs2527921                | TRIM4              | tripartite motif containing 4 [Source:HGNC Symbol;Acc:16275]                                        |
| ENSG00000124733 | 6.43350753_C_T_b37     | 7.60E-05     | 2.00E-05    | rs9394951                | MEA1               | male-enhanced antigen 1 [Source:HGNC Symbol;Acc:6986]                                               |
| ENSG00000124733 | 6.43355851_A_G_b37     | 6.79E-05     | 2.00E-05    | rs2396004                | MEA1               | male-enhanced antigen 1 [Source:HGNC Symbol;Acc:6986]                                               |
| ENSG00000146833 | 7.99459144_C_T_b37     | 2.89E-11     | 2.30E-05    | rs503115                 | TRIM4              | tripartite motif containing 4 [Source:HGNC Symbol;Acc:16275]                                        |
| ENSG00000124733 | 6.43352898_G_A_b37     | 7.60E-05     | 2.40E-05    | rs6919440                | MEA1               | male-enhanced antigen 1 [Source:HGNC Symbol;Acc:6986]                                               |
| ENSG00000146833 | 7.99474729_C_T_b37     | 6.38E-11     | 2.50E-05    | rs2572022                | TRIM4              | tripartite motif containing 4 [Source:HGNC Symbol;Acc:16275]                                        |
| ENSG00000166924 | 7.99474729_C_T_b37     | 6.59E-05     | 2.50E-05    | rs2572022                | NYAP1              | neuronal tyrosine-phosphorylated phosphoinositide-3-kinase adaptor 1 [Source:HGNC Symbol;Acc:22009] |
| ENSG00000146833 | 7.99462904_T_TG_b37    | 2.80E-11     | 2.60E-05    | rs202184595              | TRIM4              | tripartite motif containing 4 [Source:HGNC Symbol;Acc:16275]                                        |
| ENSG00000146833 | 7.99515982_C_G_b37     | 4.29E-11     | 2.60E-05    | rs7809747                | TRIM4              | tripartite motif containing 4 [Source:HGNC Symbol;Acc:16275]                                        |
| ENSG00000146833 | 7.99466558_G_T_b37     | 1.72E-11     | 2.80E-05    | rs7447229                | TRIM4              | tripartite motif containing 4 [Source:HGNC Symbol;Acc:16275]                                        |
| ENSG00000124733 | 6.43364494_G_A_b37     | 3.38E-05     | 3.00E-05    | rs6912283                | MEA1               | male-enhanced antigen 1 [Source:HGNC Symbol;Acc:6986]                                               |
| ENSG00000140009 | 14.64694195_C_T_b37    | 3.71E-05     | 3.00E-05    | rs928554                 | ESR2               | estrogen receptor 2 (ER beta) [Source:HGNC Symbol;Acc:3468]                                         |
| ENSG00000146833 | 7.99574738_T_A_b37     | 7.27E-05     | 3.20E-05    | rs2247607                | TRIM4              | tripartite motif containing 4 [Source:HGNC Symbol;Acc:16275]                                        |
| ENSG00000146833 | 7.99473624_T_G_b37     | 2.70E-11     | 3.30E-05    | rs1025576                | TRIM4              | tripartite motif containing 4 [Source:HGNC Symbol;Acc:16275]                                        |
| ENSG00000120805 | 12.101682211_A_G_b37   | 2.11E-05     | 3.40E-05    | rs703713                 | ARL1               | ADP-ribosylation factor-like 1 [Source:HGNC Symbol;Acc:692]                                         |
| ENSG00000146833 | 7.99498145_G_A_b37     | 1.05E-11     | 4.10E-05    | rs2527914                | TRIM4              | tripartite motif containing 4 [Source:HGNC Symbol;Acc:16275]                                        |
| ENSG00000146833 | 7.99503625_A_G_b37     | 1.28E-10     | 4.40E-05    | rs2527911                | TRIM4              | tripartite motif containing 4 [Source:HGNC Symbol;Acc:16275]                                        |
| ENSG00000120805 | 12.101707067_A_G_b37   | 3.26E-05     | 4.40E-05    | rs7980431                | ARL1               | ADP-ribosylation factor-like 1 [Source:HGNC Symbol;Acc:692]                                         |
| ENSG00000233621 | 1.37930294_C_A_b37     | 1.22E-10     | 4.50E-05    | rs2811642                | LINC01137          | long intergenic non-protein coding RNA 1137 [Source:HGNC Symbol;Acc:49453]                          |
| ENSG00000136169 | 13.50062327_C_T_b37    | 2.44E-05     | 4.60E-05    | rs959421                 | SETDB2             | SET domain, bifurcated 2 [Source:HGNC Symbol;Acc:20263]                                             |
| ENSG00000146833 | 7.99489005_A_G_b37     | 1.04E-11     | 4.90E-05    | rs2572009                | TRIM4              | tripartite motif containing 4 [Source:HGNC Symbol;Acc:16275]                                        |
| ENSG00000146833 | 7.99515100_T_C_b37     | 8.55E-12     | 5.00E-05    | rs2571996                | TRIM4              | tripartite motif containing 4 [Source:HGNC Symbol;Acc:16275]                                        |
| ENSG00000136169 | 13.50053063_A_G_b37    | 2.79E-05     | 5.40E-05    | rs9526564                | SETDB2             | SET domain, bifurcated 2 [Source:HGNC Symbol;Acc:20263]                                             |
| ENSG00000272668 | 1.159822219_C_T_b37    | 2.63E-14     | 6.00E-05    | rs2494498                | RP11-190A12.8      |                                                                                                     |
| ENSG00000146833 | 7.99510166_AT_A_b37    | 1.75E-10     | 6.00E-05    | rs67670034               | TRIM4              | tripartite motif containing 4 [Source:HGNC Symbol;Acc:16275]                                        |
| ENSG00000136169 | 13.50027270_C_A_b37    | 1.33E-05     | 6.00E-05    | rs7982297                | SETDB2             | SET domain, bifurcated 2 [Source:HGNC Symbol;Acc:20263]                                             |
| ENSG00000136169 | 13.50044675_T_C_b37    | 1.33E-05     | 6.00E-05    | rs6561525                | SETDB2             | SET domain, bifurcated 2 [Source:HGNC Symbol;Acc:20263]                                             |
| ENSG00000136169 | 13.50057097_G_A_b37    | 2.79E-05     | 6.00E-05    | rs2057413                | SETDB2             | SET domain, bifurcated 2 [Source:HGNC Symbol;Acc:20263]                                             |
| ENSG00000140009 | 14.64695087_A_G_b37    | 3.91E-05     | 6.00E-05    | rs1152579                | ESR2               | estrogen receptor 2 (ER beta) [Source:HGNC Symbol;Acc:3468]                                         |
| ENSG00000140009 | 14.64697485_T_G_b37    | 9.16E-05     | 6.00E-05    | rs1152577                | ESR2               | estrogen receptor 2 (ER beta) [Source:HGNC Symbol;Acc:3468]                                         |
| ENSG00000146833 | 7.99487152_T_TA_b37    | 9.75E-12     | 6.20E-05    | rs59413551               | TRIM4              | tripartite motif containing 4 [Source:HGNC Symbol;Acc:16275]                                        |
| ENSG00000136169 | 13.50013622_A_C_b37    | 1.33E-05     | 7.00E-05    | rs9316453                | SETDB2             | SET domain, bifurcated 2 [Source:HGNC Symbol;Acc:20263]                                             |
| ENSG00000136169 | 13.50031536_A_AG_b37   | 2.87E-05     | 7.00E-05    | rs35097626               | SETDB2             | SET domain, bifurcated 2 [Source:HGNC Symbol;Acc:20263]                                             |
| ENSG00000136169 | 13.50054308_G_A_b37    | 2.79E-05     | 7.00E-05    | rs4142285                | SETDB2             | SET domain, bifurcated 2 [Source:HGNC Symbol;Acc:20263]                                             |
| ENSG00000140009 | 14.64697037_T_C_b37    | 9.51E-05     | 7.00E-05    | rs1152578                | ESR2               | estrogen receptor 2 (ER beta) [Source:HGNC Symbol;Acc:3468]                                         |
| ENSG00000136169 | 13.50012370_A_G_b37    | 1.33E-05     | 7.00E-05    | rs7321670                | SETDB2             | SET domain, bifurcated 2 [Source:HGNC Symbol;Acc:20263]                                             |
| ENSG00000120805 | 12.101713141_C_T_b37   | 2.16E-05     | 7.30E-05    | rs2290719                | ARL1               | ADP-ribosylation factor-like 1 [Source:HGNC Symbol;Acc:692]                                         |
| ENSG00000136169 | 13.50007393_C_T_b37    | 1.33E-05     | 7.40E-05    | rs7998660                | SETDB2             | SET domain, bifurcated 2 [Source:HGNC Symbol;Acc:20263]                                             |
| ENSG00000124733 | 6.43349308_A_G_b37     | 3.40E-05     | 8.00E-05    | rs7763350                | MEA1               | male-enhanced antigen 1 [Source:HGNC Symbol;Acc:6986]                                               |
| ENSG00000146833 | 7.99481344_T_G_b37     | 1.04E-11     | 8.00E-05    | rs2082745                | TRIM4              | tripartite motif containing 4 [Source:HGNC Symbol;Acc:16275]                                        |
| ENSG00000136169 | 13.50008301_A_G_b37    | 1.33E-05     | 8.00E-05    | rs3764090                | SETDB2             | SET domain, bifurcated 2 [Source:HGNC Symbol;Acc:20263]                                             |
| ENSG00000136169 | 13.50010199_T_C_b37    | 2.07E-05     | 8.00E-05    | rs1322787                | SETDB2             | SET domain, bifurcated 2 [Source:HGNC Symbol;Acc:20263]                                             |
| ENSG00000136169 | 13.50015428_C_A_b37    | 1.33E-05     | 8.00E-05    | rs7982598                | SETDB2             | SET domain, bifurcated 2 [Source:HGNC Symbol;Acc:20263]                                             |
| ENSG00000136169 | 13.50054346_G_T_b37    | 2.79E-05     | 8.00E-05    | rs7996852                | SETDB2             | SET domain, bifurcated 2 [Source:HGNC Symbol;Acc:20263]                                             |
| ENSG00000136169 | 13.50060676_T_G_b37    | 2.57E-05     | 8.00E-05    | rs7321228                | SETDB2             | SET domain, bifurcated 2 [Source:HGNC Symbol;Acc:20263]                                             |
| ENSG00000146833 | 7.99481416_C_T_b37     | 1.04E-11     | 9.00E-05    | rs2082744                | TRIM4              | tripartite motif containing 4 [Source:HGNC Symbol;Acc:16275]                                        |
| ENSG00000146833 | 7.99524694_A_G_b37     | 1.10E-11     | 9.00E-05    | rs2527903                | TRIM4              | tripartite motif containing 4 [Source:HGNC Symbol;Acc:16275]                                        |
| ENSG00000120805 | 12.101722005_A_C_b37   | 2.45E-05     | 9.00E-05    | rs7313828                | ARL1               | ADP-ribosylation factor-like 1 [Source:HGNC Symbol;Acc:692]                                         |
| ENSG00000136169 | 13.50008646_G_C_b37    | 2.16E-05     | 9.00E-05    | rs7987940                | SETDB2             | SET domain, bifurcated 2 [Source:HGNC Symbol;Acc:20263]                                             |
| ENSG00000172273 | 11.119029849_T_C_b37   | 4.57E-06     | 1.00E-04    | rs485030                 | HINFP              | histone H4 transcription factor [Source:HGNC Symbol;Acc:17850]                                      |
| ENSG00000136169 | 13.50008112_G_A_b37    | 1.35E-05     | 1.00E-04    | rs3764091                | SETDB2             | SET domain, bifurcated 2 [Source:HGNC Symbol;Acc:20263]                                             |
| ENSG00000136169 | 13.50043820_A_G_b37    | 1.33E-05     | 1.00E-04    | rs2407692                | SETDB2             | SET domain, bifurcated 2 [Source:HGNC Symbol;Acc:20263]                                             |
| ENSG00000136169 | 13.50073563_C_G_b37    | 9.48E-05     | 1.00E-04    | rs3794381                | SETDB2             | SET domain, bifurcated 2 [Source:HGNC Symbol;Acc:20263]                                             |
| ENSG00000120805 | 12.101706987_A_G_b37   | 4.38E-05     | 0.000109999 | rs1471130                | ARL1               | ADP-ribosylation factor-like 1 [Source:HGNC Symbol;Acc:692]                                         |
| ENSG00000136169 | 13.50006884_G_A_b37    | 1.34E-05     | 0.000109999 | rs7998022                | SETDB2             | SET domain, bifurcated 2 [Source:HGNC Symbol;Acc:20263]                                             |
| ENSG00000136169 | 13.50009798_A_G_b37    | 1.34E-05     | 0.000109999 | rs7330512                | SETDB2             | SET domain, bifurcated 2 [Source:HGNC Symbol;Acc:20263]                                             |
| ENSG00000233621 | 1.37922609_A_T_b37     | 7.44E-13     | 0.000109999 | rs2811617                | LINC01137          | long intergenic non-protein coding RNA 1137 [Source:HGNC Symbol;Acc:49453]                          |
| ENSG00000136169 | 13.50025495_T_A_b37    | 4.21E-05     | 0.000109999 | rs1543514                | SETDB2             | SET domain, bifurcated 2 [Source:HGNC Symbol;Acc:20263]                                             |
| ENSG00000136169 | 13.50031535_C_CA_b37   | 5.49E-05     | 0.000109999 | rs201518296              | SETDB2             | SET domain, bifurcated 2 [Source:HGNC Symbol;Acc:20263]                                             |
| ENSG00000140009 | 14.64700292_C_T_b37    | 8.49E-05     | 0.000109999 | rs944047                 | ESR2               | estrogen receptor 2 (ER beta) [Source:HGNC Symbol;Acc:3468]                                         |
| ENSG00000140009 | 14.64700299_G_A_b37    | 8.49E-05     | 0.000109999 | rs944046                 | ESR2               | estrogen receptor 2 (ER beta) [Source:HGNC Symbol;Acc:3468]                                         |
| ENSG00000272668 | 1.159827011_C_T_b37    | 1.22E-09     | 0.000129999 | rs2494501                | RP11-190A12.8      |                                                                                                     |
| ENSG00000115841 | 2.38173070_C_T_b37     | 7.29E-06     | 0.000129999 | rs4670798                | RMDN2              | regulator of microtubule dynamics 2 [Source:HGNC Symbol;Acc:26567]                                  |
| ENSG00000146833 | 7.99510167_T_A_b37     | 3.26E-10     | 0.000129999 | rs34277597               | TRIM4              | tripartite motif containing 4 [Source:HGNC Symbol;Acc:16275]                                        |
| ENSG0000014683  |                        |              |             |                          |                    |                                                                                                     |

|                 |                      |          |             |             |               |                                                                                                     |
|-----------------|----------------------|----------|-------------|-------------|---------------|-----------------------------------------------------------------------------------------------------|
| ENSG00000230795 | 6_29817106_T_A_b37   | 9.91E-05 | 0.000149999 | rs2523765   | HLA-K         | major histocompatibility complex, class I, K (pseudogene) [Source:HGNC Symbol;Acc:4969]             |
| ENSG00000227766 | 6_29817106_T_A_b37   | 5.59E-15 | 0.000149999 | rs2523765   | HCG4P5        | HLA complex group 4 pseudogene 5 [Source:HGNC Symbol;Acc:22925]                                     |
| ENSG00000204622 | 6_29817106_T_A_b37   | 2.94E-13 | 0.000149999 | rs2523765   | HLA-J         | major histocompatibility complex, class I, J (pseudogene) [Source:HGNC Symbol;Acc:4967]             |
| ENSG00000124733 | 6_43349795_G_A_b37   | 2.21E-05 | 0.000149999 | rs7764523   | MEA1          | male-enhanced antigen 1 [Source:HGNC Symbol;Acc:6986]                                               |
| ENSG00000124733 | 6_43352980_A_G_b37   | 3.40E-05 | 0.000149999 | rs1214759   | MEA1          | male-enhanced antigen 1 [Source:HGNC Symbol;Acc:6986]                                               |
| ENSG00000136169 | 13_50022089_G_C_b37  | 4.83E-05 | 0.000149999 | rs7992603   | SETDB2        | SET domain, bifurcated 2 [Source:HGNC Symbol;Acc:20263]                                             |
| ENSG00000233621 | 1_37930629_T_C_b37   | 1.33E-12 | 0.000159998 | rs2783724   | LINC01137     | long intergenic non-protein coding RNA 1137 [Source:HGNC Symbol;Acc:49453]                          |
| ENSG00000136169 | 13_50012949_C_T_b37  | 3.24E-05 | 0.000159998 | rs7327520   | SETDB2        | SET domain, bifurcated 2 [Source:HGNC Symbol;Acc:20263]                                             |
| ENSG00000124733 | 6_43349215_G_A_b37   | 2.59E-05 | 0.000169998 | rs7763558   | MEA1          | male-enhanced antigen 1 [Source:HGNC Symbol;Acc:6986]                                               |
| ENSG00000136169 | 13_50040593_T_G_b37  | 8.59E-06 | 0.000169998 | rs7328782   | SETDB2        | SET domain, bifurcated 2 [Source:HGNC Symbol;Acc:20263]                                             |
| ENSG00000136169 | 13_50066643_T_A_b37  | 4.55E-05 | 0.000169998 | rs6561527   | SETDB2        | SET domain, bifurcated 2 [Source:HGNC Symbol;Acc:20263]                                             |
| ENSG00000138821 | 4_103319643_A_G_b37  | 7.00E-05 | 0.000179998 | rs80271034  | SLC39A8       | solute carrier family 39 (zinc transporter), member 8 [Source:HGNC Symbol;Acc:20862]                |
| ENSG00000140009 | 14_64686207_A_G_b37  | 9.87E-05 | 0.000179998 | rs915057    | ESR2          | estrogen receptor 2 (ER beta) [Source:HGNC Symbol;Acc:3468]                                         |
| ENSG00000233621 | 1_37927023_A_G_b37   | 2.63E-12 | 0.000189998 | rs2811638   | LINC01137     | long intergenic non-protein coding RNA 1137 [Source:HGNC Symbol;Acc:49453]                          |
| ENSG00000233621 | 1_37932018_C_T_b37   | 1.37E-12 | 0.000189998 | rs2783727   | LINC01137     | long intergenic non-protein coding RNA 1137 [Source:HGNC Symbol;Acc:49453]                          |
| ENSG00000138821 | 4_103322304_T_C_b37  | 7.00E-05 | 0.000189998 | rs61325025  | SLC39A8       | solute carrier family 39 (zinc transporter), member 8 [Source:HGNC Symbol;Acc:20862]                |
| ENSG00000175643 | 16_11461071_C_G_b37  | 5.28E-09 | 0.000199998 | rs9938869   | RM12          | RecQ mediated genome instability 2 [Source:HGNC Symbol;Acc:28349]                                   |
| ENSG00000233621 | 1_37922859_C_T_b37   | 6.51E-14 | 0.000209998 | rs2660569   | LINC01137     | long intergenic non-protein coding RNA 1137 [Source:HGNC Symbol;Acc:49453]                          |
| ENSG00000124762 | 6_37593165_T_C_b37   | 4.81E-05 | 0.000209998 | rs115736884 | CDKN1A        | cyclin-dependent kinase inhibitor 1A (p21, Cip1) [Source:HGNC Symbol;Acc:1784]                      |
| ENSG00000136169 | 13_50059531_T_C_b37  | 4.15E-05 | 0.000219998 | rs1409017   | SETDB2        | SET domain, bifurcated 2 [Source:HGNC Symbol;Acc:20263]                                             |
| ENSG00000153406 | 16_4560627_T_A_b37   | 5.49E-09 | 0.000219998 | rs1477123   | NMRAL1        | NmrA-like family domain containing 1 [Source:HGNC Symbol;Acc:24987]                                 |
| ENSG00000089486 | 16_4560627_T_A_b37   | 2.72E-05 | 0.000219998 | rs1477123   | CDIP1         | cell death-inducing p53 target 1 [Source:HGNC Symbol;Acc:13234]                                     |
| ENSG00000272668 | 1_159827475_G_A_b37  | 9.96E-10 | 0.000229998 | rs11584200  | RP11-190A12.8 |                                                                                                     |
| ENSG00000136169 | 13_50005444_T_C_b37  | 1.32E-05 | 0.000229998 | rs1358991   | SETDB2        | SET domain, bifurcated 2 [Source:HGNC Symbol;Acc:20263]                                             |
| ENSG00000136169 | 13_50005780_C_T_b37  | 5.95E-06 | 0.000239998 | rs1853324   | SETDB2        | SET domain, bifurcated 2 [Source:HGNC Symbol;Acc:20263]                                             |
| ENSG00000233621 | 1_37930414_A_G_b37   | 9.04E-13 | 0.000249998 | rs2660564   | LINC01137     | long intergenic non-protein coding RNA 1137 [Source:HGNC Symbol;Acc:49453]                          |
| ENSG00000272668 | 1_159824205_C_T_b37  | 9.13E-08 | 0.000249998 | rs11807946  | RP11-190A12.8 |                                                                                                     |
| ENSG00000146833 | 7_99475473_T_C_b37   | 2.45E-11 | 0.000249998 | rs2060452   | TRIM4         | tripartite motif containing 4 [Source:HGNC Symbol;Acc:16275]                                        |
| ENSG00000166924 | 7_99475473_T_C_b37   | 4.79E-05 | 0.000249998 | rs2060452   | NYAP1         | neuronal tyrosine-phosphorylated phosphoinositide-3-kinase adaptor 1 [Source:HGNC Symbol;Acc:22009] |
| ENSG00000136169 | 13_50009874_C_T_b37  | 5.15E-05 | 0.000249998 | rs9535243   | SETDB2        | SET domain, bifurcated 2 [Source:HGNC Symbol;Acc:20263]                                             |
| ENSG00000136169 | 16_4560628_A_G_b37   | 4.14E-05 | 0.000249998 | rs7337488   | SETDB2        | SET domain, bifurcated 2 [Source:HGNC Symbol;Acc:20263]                                             |
| ENSG00000187990 | 6_25315540_T_C_b37   | 8.38E-05 | 0.000269997 | rs6936496   | HIST1H2BG     | histone cluster 1, H2bg [Source:HGNC Symbol;Acc:4746]                                               |
| ENSG00000154548 | 6_89772333_T_C_b37   | 4.87E-07 | 0.000269997 | rs7760084   | SRSF12        | serine/arginine-rich splicing factor 12 [Source:HGNC Symbol;Acc:21220]                              |
| ENSG00000233621 | 1_37929005_G_A_b37   | 1.13E-12 | 0.000289997 | rs2811641   | LINC01137     | long intergenic non-protein coding RNA 1137 [Source:HGNC Symbol;Acc:49453]                          |
| ENSG00000233621 | 1_37921596_G_A_b37   | 4.94E-13 | 0.000299997 | rs2492298   | LINC01137     | long intergenic non-protein coding RNA 1137 [Source:HGNC Symbol;Acc:49453]                          |
| ENSG00000272668 | 1_159827416_C_A_b37  | 9.75E-10 | 0.000299997 | rs4477268   | RP11-190A12.8 |                                                                                                     |
| ENSG00000136169 | 13_50038080_G_A_b37  | 3.92E-05 | 0.000299997 | rs12429813  | SETDB2        | SET domain, bifurcated 2 [Source:HGNC Symbol;Acc:20263]                                             |
| ENSG00000136169 | 13_50057287_A_G_b37  | 4.15E-05 | 0.000299997 | rs2057414   | SETDB2        | SET domain, bifurcated 2 [Source:HGNC Symbol;Acc:20263]                                             |
| ENSG00000136169 | 13_50058686_G_A_b37  | 5.02E-05 | 0.000299997 | rs2057416   | SETDB2        | SET domain, bifurcated 2 [Source:HGNC Symbol;Acc:20263]                                             |
| ENSG00000254419 | 20_57299586_G_A_b37  | 7.74E-05 | 0.000319997 | rs6128410   | RP11-261P.4   |                                                                                                     |
| ENSG00000146833 | 7_99574758_A_G_b37   | 2.64E-08 | 0.000369996 | rs2283017   | TRIM4         | tripartite motif containing 4 [Source:HGNC Symbol;Acc:16275]                                        |
| ENSG00000080514 | 7_99574758_A_G_b37   | 8.40E-05 | 0.000369996 | rs2283017   | PILRA         | paired immunoglobulin-like type 2 receptor alpha [Source:HGNC Symbol;Acc:20396]                     |
| ENSG00000233621 | 1_37919466_G_A_b37   | 2.06E-12 | 0.000379996 | rs12401987  | LINC01137     | long intergenic non-protein coding RNA 1137 [Source:HGNC Symbol;Acc:49453]                          |
| ENSG00000233621 | 1_37930001_C_T_b37   | 8.88E-13 | 0.000379996 | rs2660562   | LINC01137     | long intergenic non-protein coding RNA 1137 [Source:HGNC Symbol;Acc:49453]                          |
| ENSG00000233621 | 1_37930917_T_C_b37   | 9.25E-13 | 0.000379996 | rs2783725   | LINC01137     | long intergenic non-protein coding RNA 1137 [Source:HGNC Symbol;Acc:49453]                          |
| ENSG00000233621 | 1_37927981_A_C_b37   | 9.50E-13 | 0.000389996 | rs3122179   | LINC01137     | long intergenic non-protein coding RNA 1137 [Source:HGNC Symbol;Acc:49453]                          |
| ENSG00000233621 | 1_37932566_A_G_b37   | 4.88E-12 | 0.000389996 | rs2484555   | LINC01137     | long intergenic non-protein coding RNA 1137 [Source:HGNC Symbol;Acc:49453]                          |
| ENSG00000233621 | 1_37931752_T_C_b37   | 9.25E-13 | 0.000399996 | rs2245873   | LINC01137     | long intergenic non-protein coding RNA 1137 [Source:HGNC Symbol;Acc:49453]                          |
| ENSG00000136169 | 13_50018840_CA_C_b37 | 3.71E-05 | 0.000459995 | rs71307668  | SETDB2        | SET domain, bifurcated 2 [Source:HGNC Symbol;Acc:20263]                                             |
| ENSG00000148803 | 10_134254005_G_A_b37 | 1.59E-06 | 0.000469995 | rs189735161 | FUOM          | fructose mutarotase [Source:HGNC Symbol;Acc:24733]                                                  |
