# Supplementary material for: Meta-Analysis of Polymyositis and Dermatomyositis Microarray Data Reveals Novel Genetic Biomarkers
Source: MDPI journal article supplement (doi:10.3390/genes10110864), 2019-10-30
Supplement: s1 [file s1]

Supplementary Table 3. Detected SNPs and eGenes in muscle tissue.

| gene             | SNP                     | GTEX_p_value | p_value  | rs_id_dbSNP142_GRCh37p13 | external_gene_name | description                                                                               |
|------------------|-------------------------|--------------|----------|--------------------------|--------------------|-------------------------------------------------------------------------------------------|
| ENS000000178252  | 3.49878264_C_G_b37      | 1.81E-05     | 2.00E-06 | rs1996663                | WDR6               | WD repeat domain 6 [Source:HGNC Symbol;Acc:12758]                                         |
| ENS000000145020  | 3.49878264_C_G_b37      | 5.07E-10     | 2.00E-06 | rs1996663                | AMT                | aminomethyltransferase [Source:HGNC Symbol;Acc:473]                                       |
| ENS000000185614  | 3.49878264_C_G_b37      | 4.22E-06     | 2.00E-06 | rs1996663                | FAM212A            | family with sequence similarity 212, member A [Source:HGNC Symbol;Acc:32480]              |
| ENS000000178252  | 3.49868876_A_T_b37      | 1.79E-05     | 3.00E-06 | rs7649428                | WDR6               | WD repeat domain 6 [Source:HGNC Symbol;Acc:12758]                                         |
| ENS000000145020  | 3.49868876_A_T_b37      | 6.64E-10     | 3.00E-06 | rs7649428                | AMT                | aminomethyltransferase [Source:HGNC Symbol;Acc:473]                                       |
| ENS000000185614  | 3.49868876_A_T_b37      | 4.98E-06     | 3.00E-06 | rs7649428                | FAM212A            | family with sequence similarity 212, member A [Source:HGNC Symbol;Acc:32480]              |
| ENS000000178252  | 3.49853796_T_A_b37      | 1.78E-05     | 5.00E-06 | rs62260720               | WDR6               | WD repeat domain 6 [Source:HGNC Symbol;Acc:12758]                                         |
| ENS000000178252  | 3.49871201_C_T_b37      | 1.81E-05     | 5.00E-06 | rs61557789               | WDR6               | WD repeat domain 6 [Source:HGNC Symbol;Acc:12758]                                         |
| ENS000000145020  | 3.49853796_T_A_b37      | 4.80E-10     | 5.00E-06 | rs62260720               | AMT                | aminomethyltransferase [Source:HGNC Symbol;Acc:473]                                       |
| ENS000000145020  | 3.49871201_C_T_b37      | 5.07E-10     | 5.00E-06 | rs61557789               | AMT                | aminomethyltransferase [Source:HGNC Symbol;Acc:473]                                       |
| ENS000000185614  | 3.49853796_T_A_b37      | 4.27E-06     | 5.00E-06 | rs62260720               | FAM212A            | family with sequence similarity 212, member A [Source:HGNC Symbol;Acc:32480]              |
| ENS000000185614  | 3.49871201_C_T_b37      | 4.22E-06     | 5.00E-06 | rs61557789               | FAM212A            | family with sequence similarity 212, member A [Source:HGNC Symbol;Acc:32480]              |
| ENS000000178252  | 3.49848414_C_T_b37      | 3.42E-05     | 6.00E-06 | rs28535523               | WDR6               | WD repeat domain 6 [Source:HGNC Symbol;Acc:12758]                                         |
| ENS000000178252  | 3.49872124_T_C_b37      | 1.81E-05     | 6.00E-06 | rs62260723               | WDR6               | WD repeat domain 6 [Source:HGNC Symbol;Acc:12758]                                         |
| ENS000000145020  | 3.49848414_C_T_b37      | 1.85E-10     | 6.00E-06 | rs28535523               | AMT                | aminomethyltransferase [Source:HGNC Symbol;Acc:473]                                       |
| ENS000000145020  | 3.49872124_T_C_b37      | 5.07E-10     | 6.00E-06 | rs62260723               | AMT                | aminomethyltransferase [Source:HGNC Symbol;Acc:473]                                       |
| ENS000000235261  | 3.49848414_C_T_b37      | 6.22E-05     | 6.00E-06 | rs28535523               | NICN1-AS1          | NICN1 antisense RNA 1 [Source:HGNC Symbol;Acc:40838]                                      |
| ENS000000185614  | 3.49848414_C_T_b37      | 2.49E-06     | 6.00E-06 | rs28535523               | FAM212A            | family with sequence similarity 212, member A [Source:HGNC Symbol;Acc:32480]              |
| ENS000000185614  | 3.49872124_T_C_b37      | 4.22E-06     | 6.00E-06 | rs62260723               | FAM212A            | family with sequence similarity 212, member A [Source:HGNC Symbol;Acc:32480]              |
| ENS000000178252  | 3.49878395_A_G_b37      | 1.81E-05     | 7.00E-06 | rs1996664                | WDR6               | WD repeat domain 6 [Source:HGNC Symbol;Acc:12758]                                         |
| ENS000000178252  | 3.49886319_G_T_b37      | 3.91E-05     | 7.00E-06 | rs77941694               | WDR6               | WD repeat domain 6 [Source:HGNC Symbol;Acc:12758]                                         |
| ENS000000145020  | 3.49878395_A_G_b37      | 5.07E-10     | 7.00E-06 | rs1996664                | AMT                | aminomethyltransferase [Source:HGNC Symbol;Acc:473]                                       |
| ENS000000145020  | 3.49886319_G_T_b37      | 2.49E-10     | 7.00E-06 | rs77941694               | AMT                | aminomethyltransferase [Source:HGNC Symbol;Acc:473]                                       |
| ENS000000185614  | 3.49878395_A_G_b37      | 4.22E-06     | 7.00E-06 | rs1996664                | FAM212A            | family with sequence similarity 212, member A [Source:HGNC Symbol;Acc:32480]              |
| ENS000000185614  | 3.49886319_G_T_b37      | 9.78E-06     | 7.00E-06 | rs77941694               | FAM212A            | family with sequence similarity 212, member A [Source:HGNC Symbol;Acc:32480]              |
| ENS000000004534  | 3.49886319_G_T_b37      | 5.79E-06     | 7.00E-06 | rs77941694               | RBM6               | RNA binding motif protein 6 [Source:HGNC Symbol;Acc:9903]                                 |
| ENS000000178252  | 3.49874246_C_T_b37      | 1.81E-05     | 8.00E-06 | rs59684465               | WDR6               | WD repeat domain 6 [Source:HGNC Symbol;Acc:12758]                                         |
| ENS000000145020  | 3.49874246_C_T_b37      | 5.07E-10     | 8.00E-06 | rs59684465               | AMT                | aminomethyltransferase [Source:HGNC Symbol;Acc:473]                                       |
| ENS000000185614  | 3.49874246_C_T_b37      | 4.22E-06     | 8.00E-06 | rs59684465               | FAM212A            | family with sequence similarity 212, member A [Source:HGNC Symbol;Acc:32480]              |
| ENS000000178252  | 3.49866584_T_G_b37      | 2.10E-05     | 1.10E-05 | rs35129566               | WDR6               | WD repeat domain 6 [Source:HGNC Symbol;Acc:12758]                                         |
| ENS000000145020  | 3.49866584_T_G_b37      | 9.25E-10     | 1.10E-05 | rs35129566               | AMT                | aminomethyltransferase [Source:HGNC Symbol;Acc:473]                                       |
| ENS000000185614  | 3.49866584_T_G_b37      | 4.20E-06     | 1.10E-05 | rs35129566               | FAM212A            | family with sequence similarity 212, member A [Source:HGNC Symbol;Acc:32480]              |
| ENS0000000232112 | 3.49210732_A_C_b37      | 1.23E-06     | 1.40E-05 | rs7617480                | TMA7               | translation machinery associated 7 homolog (S. cerevisiae) [Source:HGNC Symbol;Acc:26932] |
| ENS000000178252  | 3.49210732_A_C_b37      | 8.32E-12     | 1.40E-05 | rs7617480                | WDR6               | WD repeat domain 6 [Source:HGNC Symbol;Acc:12758]                                         |
| ENS000000067560  | 3.49210732_A_C_b37      | 2.21E-06     | 1.40E-05 | rs7617480                | RHOA               | ras homolog family member A [Source:HGNC Symbol;Acc:667]                                  |
| ENS000000145020  | 3.49210732_A_C_b37      | 1.43E-18     | 1.40E-05 | rs7617480                | AMT                | aminomethyltransferase [Source:HGNC Symbol;Acc:473]                                       |
| ENS000000145020  | 3.49655927_T_A_b37      | 2.16E-09     | 1.40E-05 | rs62262672               | AMT                | aminomethyltransferase [Source:HGNC Symbol;Acc:473]                                       |
| ENS000000235261  | 3.49210732_A_C_b37      | 9.28E-09     | 1.40E-05 | rs7617480                | NICN1-AS1          | NICN1 antisense RNA 1 [Source:HGNC Symbol;Acc:40838]                                      |
| ENS000000145029  | 3.49210732_A_C_b37      | 2.48E-08     | 1.40E-05 | rs7617480                | NICN1              | nicotin 1 [Source:HGNC Symbol;Acc:18317]                                                  |
| ENS000000185614  | 3.49210732_A_C_b37      | 6.75E-07     | 1.40E-05 | rs7617480                | FAM212A            | family with sequence similarity 212, member A [Source:HGNC Symbol;Acc:32480]              |
| ENS000000185614  | 3.49655927_T_A_b37      | 5.23E-06     | 1.40E-05 | rs62262672               | FAM212A            | family with sequence similarity 212, member A [Source:HGNC Symbol;Acc:32480]              |
| ENS000000145020  | 3.49715354_G_T_b37      | 1.24E-09     | 1.50E-05 | rs4855882                | AMT                | aminomethyltransferase [Source:HGNC Symbol;Acc:473]                                       |
| ENS000000185614  | 3.49715354_G_T_b37      | 2.42E-06     | 1.50E-05 | rs4855882                | FAM212A            | family with sequence similarity 212, member A [Source:HGNC Symbol;Acc:32480]              |
| ENS000000004534  | 3.49715354_G_T_b37      | 8.76E-05     | 1.50E-05 | rs4855882                | RBM6               | RNA binding motif protein 6 [Source:HGNC Symbol;Acc:9903]                                 |
| ENS000000145020  | 3.49656530_CTGAAC_C_b37 | 1.32E-09     | 2.00E-05 | rs72410852               | AMT                | aminomethyltransferase [Source:HGNC Symbol;Acc:473]                                       |
| ENS000000185614  | 3.49656530_CTGAAC_C_b37 | 2.92E-06     | 2.00E-05 | rs72410852               | FAM212A            | family with sequence similarity 212, member A [Source:HGNC Symbol;Acc:32480]              |
| ENS000000004534  | 3.49656530_CTGAAC_C_b37 | 9.11E-05     | 2.00E-05 | rs72410852               | RBM6               | RNA binding motif protein 6 [Source:HGNC Symbol;Acc:9903]                                 |
| ENS000000145020  | 3.49808274_T_G_b37      | 1.44E-09     | 2.20E-05 | rs62262730               | AMT                | aminomethyltransferase [Source:HGNC Symbol;Acc:473]                                       |
| ENS000000185614  | 3.49808274_T_G_b37      | 2.62E-06     | 2.20E-05 | rs62262730               | FAM212A            | family with sequence similarity 212, member A [Source:HGNC Symbol;Acc:32480]              |
| ENS000000004534  | 3.49808274_T_G_b37      | 8.64E-05     | 2.20E-05 | rs62262730               | RBM6               | RNA binding motif protein 6 [Source:HGNC Symbol;Acc:9903]                                 |
| ENS000000178977  | 17.8183681_A_C_b37      | 7.76E-05     | 2.60E-05 | rs11078739               | LINC00324          | long intergenic non-protein coding RNA 324 [Source:HGNC Symbol;Acc:26628]                 |
| ENS000000178252  | 3.49829653_A_G_b37      | 3.18E-05     | 3.00E-05 | rs7637711                | WDR6               | WD repeat domain 6 [Source:HGNC Symbol;Acc:12758]                                         |
| ENS000000145020  | 3.49811047_G_A_b37      | 1.74E-09     | 3.00E-05 | rs148383796              | AMT                | aminomethyltransferase [Source:HGNC Symbol;Acc:473]                                       |
| ENS000000145020  | 3.49829653_A_G_b37      | 2.09E-10     | 3.00E-05 | rs7637711                | AMT                | aminomethyltransferase [Source:HGNC Symbol;Acc:473]                                       |
| ENS000000235261  | 3.49829653_A_G_b37      | 3.08E-05     | 3.00E-05 | rs7637711                | NICN1-AS1          | NICN1 antisense RNA 1 [Source:HGNC Symbol;Acc:40838]                                      |
| ENS000000145029  | 3.49829653_A_G_b37      | 6.63E-05     | 3.00E-05 | rs7637711                | NICN1              | nicotin 1 [Source:HGNC Symbol;Acc:18317]                                                  |
| ENS000000185614  | 3.49811047_G_A_b37      | 5.36E-06     | 3.00E-05 | rs148383796              | FAM212A            | family with sequence similarity 212, member A [Source:HGNC Symbol;Acc:32480]              |
| ENS000000185614  | 3.49829653_A_G_b37      | 2.00E-06     | 3.00E-05 | rs7637711                | FAM212A            | family with sequence similarity 212, member A [Source:HGNC Symbol;Acc:32480]              |
| ENS000000178252  | 3.49887277_T_TC_b37     | 7.18E-05     | 3.30E-05 | rs200837337              | WDR6               | WD repeat domain 6 [Source:HGNC Symbol;Acc:12758]                                         |
| ENS000000145020  | 3.49884852_AAAGAG_A_b37 | 3.72E-07     | 3.30E-05 | rs566869627              | AMT                | aminomethyltransferase [Source:HGNC Symbol;Acc:473]                                       |
| ENS000000145020  | 3.49887277_T_TC_b37     | 1.71E-07     | 3.30E-05 | rs200837337              | AMT                | aminomethyltransferase [Source:HGNC Symbol;Acc:473]                                       |
| ENS000000185614  | 3.49884852_AAAGAG_A_b37 | 2.01E-05     | 3.30E-05 | rs566869627              | FAM212A            | family with sequence similarity 212, member A [Source:HGNC Symbol;Acc:32480]              |
| ENS000000185614  | 3.49887277_T_TC_b37     | 7.99E-06     | 3.30E-05 | rs200837337              | FAM212A            | family with sequence similarity 212, member A [Source:HGNC Symbol;Acc:32480]              |
| ENS000000004534  | 3.49887277_T_TC_b37     | 3.33E-05     | 3.30E-05 | rs200837337              | RBM6               | RNA binding motif protein 6 [Source:HGNC Symbol;Acc:9903]                                 |
| ENS000000178252  | 3.49835450_C_T_b37      | 3.15E-05     | 3.80E-05 | rs6790568                | WDR6               | WD repeat domain 6 [Source:HGNC Symbol;Acc:12758]                                         |
| ENS000000145020  | 3.49789607_T_TA_b37     | 5.42E-10     | 3.80E-05 | rs201319899              | AMT                | aminomethyltransferase [Source:HGNC Symbol;Acc:473]                                       |
| ENS000000145020  | 3.49835450_C_T_b37      | 2.12E-10     | 3.80E-05 | rs6790568                | AMT                | aminomethyltransferase [Source:HGNC Symbol;Acc:473]                                       |
| ENS000000235261  | 3.49835450_C_T_b37      | 3.07E-05     | 3.80E-05 | rs6790568                | NICN1-AS1          | NICN1 antisense RNA 1 [Source:HGNC Symbol;Acc:40838]                                      |
| ENS000000145029  | 3.49835450_C_T_b37      | 6.83E-05     | 3.80E-05 | rs6790568                | NICN1              | nicotin 1 [Source:HGNC Symbol;Acc:18317]                                                  |
| ENS000000185614  | 3.49789607_T_TA_b37     | 3.73E-05     | 3.80E-05 | rs201319899              | FAM212A            | family with sequence similarity 212, member A [Source:HGNC Symbol;Acc:32480]              |
| ENS000000185614  | 3.49835450_C_T_b37      | 2.01E-06     | 3.80E-05 | rs6790568                | FAM212A            | family with sequence similarity 212, member A [Source:HGNC Symbol;Acc:32480]              |
| ENS000000145020  | 3.49777660_T_C_b37      | 2.63E-09     | 3.90E-05 | rs77473999               | AMT                | aminomethyltransferase [Source:HGNC Symbol;Acc:473]                                       |
| ENS000000185614  | 3.49777660_T_C_b37      | 5.59E-06     | 3.90E-05 | rs77473999               | FAM212A            | family with sequence similarity 212, member A [Source:HGNC Symbol;Acc:32480]              |
| ENS000000178252  | 3.49834571_A_G_b37      | 1.67E-05     | 4.40E-05 | rs6809879                | WDR6               | WD repeat domain 6 [Source:HGNC Symbol;Acc:12758]                                         |
| ENS000000145020  | 3.49834571_A_G_b37      | 1.99E-10     | 4.40E-05 | rs6809879                | AMT                | aminomethyltransferase [Source:HGNC Symbol;Acc:473]                                       |
| ENS000000235261  | 3.49834571_A_G_b37      | 4.16E-05     | 4.40E-05 | rs6809879                | NICN1-AS1          | NICN1 antisense RNA 1 [Source:HGNC Symbol;Acc:40838]                                      |
| ENS000000185614  | 3.49834571_A_G_b37      | 8.28E-06     | 4.40E-05 | rs6809879                | FAM212A            | family with sequence similarity 212, member A [Source:HGNC Symbol;Acc:32480]              |
| ENS000000145020  | 3.49827605_CCT_C_b37    | 3.01E-09     | 4.50E-05 | rs199640415              | AMT                | aminomethyltransferase [Source:HGNC Symbol;Acc:473]                                       |
| ENS000000185614  | 3.49827605_CCT_C_b37    | 1.14E-05     | 4.50E-05 | rs199640415              | FAM212A            | family with sequence similarity 212, member A [Source:HGNC Symbol;Acc:32480]              |
| ENS000000213672  | 3.49476263_T_C_b37      | 1.30E-05     | 6.00E-05 | rs7619789                | NCKIPSD            | NCK interacting protein with SH3 domain [Source:HGNC Symbol;Acc:15486]                    |
| ENS000000178252  | 3.49476263_T_C_b37      | 5.78E-09     | 6.00E-05 | rs7619789                | WDR6               | WD repeat domain 6 [Source:HGNC Symbol;Acc:12758]                                         |
| ENS000000067560  | 3.49476263_T_C_b37      | 4.66E-09     | 6.00E-05 | rs7619789                | RHOA               | ras homolog family member A [Source:HGNC Symbol;Acc:667]                                  |
| ENS000000145020  | 3.49476263_T_C_b37      | 3.45E-27     | 6.00E-05 | rs7619789                | AMT                | aminomethyltransferase [Source:HGNC Symbol;Acc:473]                                       |
| ENS000000235261  | 3.49476263_T_C_b37      | 4.60E-09     | 6.00E-05 | rs7619789                | NICN1-AS1          | NICN1 antisense RNA 1 [Source:HGNC Symbol;Acc:40838]                                      |
| ENS000000145029  | 3.49476263_T_C_b37      | 2.13E-09     | 6.00E-05 | rs7619789                | NICN1              | nicotin 1 [Source:HGNC Symbol;Acc:18317]                                                  |
| ENS000000185614  | 3.49476263_T_C_b37      | 5.78E-05     | 6.00E-05 | rs7619789                | FAM212A            | family with sequence similarity 212, member A [Source:HGNC Symbol;Acc:32480]              |
| ENS000000232112  | 3.49284513_A_G_b37      | 8.54E-05     | 6.50E-05 | rs12637346               | TMA7               | translation machinery associated 7 homolog (S. cerevisiae) [Source:HGNC Symbol;Acc:26932] |
| ENS000000213672  | 3.49284513_A_G_b37      | 2.51E-05     | 6.50E-05 | rs12637346               | NCKIPSD            | NCK interacting protein with SH3 domain [Source:HGNC Symbol;Acc:15486]                    |
| ENS000000178252  | 3.49284513_A_G_b37      | 3.67E-09     | 6.50E-05 | rs12637346               | WDR6               | WD repeat domain 6 [Source:HGNC Symbol;Acc:12758]                                         |
| ENS000000067560  | 3.49284513_A_G_b37      | 2.50E-08     | 6.50E-05 | rs12637346               | RHOA               | ras homolog family member A [Source:HGNC Symbol;Acc:667]                                  |
| ENS000000145020  | 3.49284513_A_G_b37      | 1.76E-25     | 6.50E-05 | rs12637346               | AMT                | aminomethyltransferase [Source:HGNC Symbol;Acc:473]                                       |
| ENS000000235261  | 3.49284513_A_G_b37      | 1.14E-10     | 6.50E-05 | rs12637346               | NICN1-AS1          | NICN1 antisense RNA 1 [Source:HGNC Symbol;Acc:40838]                                      |
| ENS000000145029  | 3.49284513_A_G_b37      | 1.82E-10     | 6.50E-05 | rs12637346               | NICN1              | nicotin 1 [Source:HGNC Symbol;Acc:18317]                                                  |
| ENS000000213672  | 3.49582994_T_C_b37      | 2.15E-05     | 7.00E-05 | rs3866330                | NCKIPSD            | NCK interacting protein with SH3 domain [Source:HGNC Symbol;Acc:15486]                    |
| ENS000000213672  | 3.49604904_G_A_b37      | 2.59E-05     | 7.00E-05 | rs11928090               | NCKIPSD            | NCK interacting protein with SH3 domain [Source:HGNC Symbol;Acc:15486]                    |
| ENS000000178252  | 3.49582994_T_C_b37      | 3.37E-09     | 7.00E-05 | rs3866330                | WDR6               | WD repeat domain 6 [Source:HGNC Symbol;Acc:12758]                                         |
| ENS000000178252  | 3.49604904_G_A_b37      | 3.99E-09     | 7.00E-05 | rs11928090               | WDR6               | WD repeat domain 6 [Source:HGNC Symbol;Acc:12758]                                         |
| ENS000000178252  | 3.49804290_C_T_b37      | 3.41E-05     | 7.00E-05 | rs6804970                | WDR6               | WD repeat domain 6 [Source:HGNC Symbol;Acc:12758]                                         |
| ENS000000067560  | 3.49582994_T_C_b37      | 2.81E-09     | 7.00E-05 | rs3866330                | RHOA               | ras homolog family member A [Source:HGNC Symbol;Acc:667]                                  |
| ENS000000067560  | 3.49604904_G_A_b37      | 3.18E-09     | 7.00E-05 | rs11928090               | RHOA               | ras homolog family member A [Source:HGNC Symbol;Acc:667]                                  |
| ENS000000145020  | 3.49582994_T_C_b37      | 4.28E-27     | 7.00E-05 | rs3866330                | AMT                | aminomethyltransferase [Source:HGNC Symbol;Acc:473]                                       |
| ENS000000145020  | 3.49604904_G_A_b37      | 7.05E-27     | 7.00E-05 | rs11928090               | AMT                | aminomethyltransferase [Source:HGNC Symbol;Acc:473]                                       |
| ENS000000145020  | 3.49646263_G_A_b37      | 1.11E-07     | 7.00E-05 | rs7646288                | AMT                | aminomethyltransferase [Source:HGNC Symbol;Acc:473]                                       |
| ENS000000145020  | 3.49804290_C_T_b37      | 4.47E-10     | 7.00E-05 | rs6804970                | AMT                | aminomethyltransferase [Source:HGNC Symbol;Acc:473]                                       |
| ENS000000235261  | 3.49582994_T_C_b37      | 5.98E-09     | 7.00E-05 | rs3866330                | NICN1-AS1          | NICN1 antisense RNA 1 [Source:HGNC Symbol;Acc:40838]                                      |
| ENS000000235261  | 3                       |              |          |                          |                    |                                                                                           |

|                 |                         |          |          |            |           |                                                                                           |
|-----------------|-------------------------|----------|----------|------------|-----------|-------------------------------------------------------------------------------------------|
| ENS00000185614  | 3_49604904_G_A_b37      | 5.99E-05 | 7.00E-05 | rs11928090 | FAM212A   | family with sequence similarity 212, member A [Source:HGNC Symbol;Acc:32480]              |
| ENS00000185614  | 3_49804290_C_T_b37      | 1.20E-06 | 7.00E-05 | rs6804970  | FAM212A   | family with sequence similarity 212, member A [Source:HGNC Symbol;Acc:32480]              |
| ENS00000153406  | 16_4603161_C_A_b37      | 6.14E-11 | 7.00E-05 | rs859219   | NMRAL1    | NmrA-like family domain containing 1 [Source:HGNC Symbol;Acc:24987]                       |
| ENS00000089486  | 16_4603161_C_A_b37      | 4.38E-10 | 7.00E-05 | rs859219   | CDIP1     | cell death-inducing p53 target 1 [Source:HGNC Symbol;Acc:13234]                           |
| ENS000000213672 | 3_49550774_A_G_b37      | 1.39E-05 | 8.00E-05 | rs3905330  | NCKIPSD   | NCK interacting protein with SH3 domain [Source:HGNC Symbol;Acc:15486]                    |
| ENS000000178252 | 3_49550774_A_G_b37      | 5.54E-09 | 8.00E-05 | rs3905330  | WDR6      | WD repeat domain 6 [Source:HGNC Symbol;Acc:12758]                                         |
| ENS000000178252 | 3_49798864_G_A_b37      | 2.35E-05 | 8.00E-05 | rs7621797  | WDR6      | WD repeat domain 6 [Source:HGNC Symbol;Acc:12758]                                         |
| ENS000000067560 | 3_49550774_A_G_b37      | 4.69E-09 | 8.00E-05 | rs3905330  | RHOA      | ras homolog family member A [Source:HGNC Symbol;Acc:667]                                  |
| ENS000000145020 | 3_49550774_A_G_b37      | 3.79E-27 | 8.00E-05 | rs3905330  | AMT       | aminomethyltransferase [Source:HGNC Symbol;Acc:473]                                       |
| ENS000000145020 | 3_49789615_T_A_b37      | 7.68E-08 | 8.00E-05 | rs7429338  | AMT       | aminomethyltransferase [Source:HGNC Symbol;Acc:473]                                       |
| ENS000000145020 | 3_49798864_G_A_b37      | 1.90E-11 | 8.00E-05 | rs7621797  | AMT       | aminomethyltransferase [Source:HGNC Symbol;Acc:473]                                       |
| ENS000000235261 | 3_49550774_A_G_b37      | 4.95E-09 | 8.00E-05 | rs3905330  | NICN1-AS1 | NICN1 antisense RNA 1 [Source:HGNC Symbol;Acc:40838]                                      |
| ENS000000235261 | 3_49798864_G_A_b37      | 1.73E-05 | 8.00E-05 | rs7621797  | NICN1-AS1 | NICN1 antisense RNA 1 [Source:HGNC Symbol;Acc:40838]                                      |
| ENS000000145029 | 3_49550774_A_G_b37      | 2.24E-09 | 8.00E-05 | rs3905330  | NICN1     | nicotin 1 [Source:HGNC Symbol;Acc:18317]                                                  |
| ENS000000145029 | 3_49798864_G_A_b37      | 4.85E-05 | 8.00E-05 | rs7621797  | NICN1     | nicotin 1 [Source:HGNC Symbol;Acc:18317]                                                  |
| ENS000000185614 | 3_49550774_A_G_b37      | 6.02E-05 | 8.00E-05 | rs3905330  | FAM212A   | family with sequence similarity 212, member A [Source:HGNC Symbol;Acc:32480]              |
| ENS000000185614 | 3_49798864_G_A_b37      | 1.16E-05 | 8.00E-05 | rs7621797  | FAM212A   | family with sequence similarity 212, member A [Source:HGNC Symbol;Acc:32480]              |
| ENS000000178977 | 17_8182267_G_A_b37      | 6.49E-05 | 8.00E-05 | rs6503096  | LINC00324 | long intergenic non-protein coding RNA 324 [Source:HGNC Symbol;Acc:26628]                 |
| ENS000000232112 | 3_49236439_T_G_b37      | 8.87E-05 | 9.00E-05 | rs6808036  | TMA7      | translation machinery associated 7 homolog (S. cerevisiae) [Source:HGNC Symbol;Acc:26932] |
| ENS000000213672 | 3_49236439_T_G_b37      | 2.59E-05 | 9.00E-05 | rs6808036  | NCKIPSD   | NCK interacting protein with SH3 domain [Source:HGNC Symbol;Acc:15486]                    |
| ENS000000213672 | 3_49286618_T_G_b37      | 1.83E-05 | 9.00E-05 | rs4955443  | NCKIPSD   | NCK interacting protein with SH3 domain [Source:HGNC Symbol;Acc:15486]                    |
| ENS000000213672 | 3_49443081_T_C_b37      | 1.32E-05 | 9.00E-05 | rs13096474 | NCKIPSD   | NCK interacting protein with SH3 domain [Source:HGNC Symbol;Acc:15486]                    |
| ENS000000213672 | 3_49481438_AGGACT_A_b37 | 1.60E-05 | 9.00E-05 | rs60691649 | NCKIPSD   | NCK interacting protein with SH3 domain [Source:HGNC Symbol;Acc:15486]                    |
| ENS000000213672 | 3_49516350_G_A_b37      | 1.28E-05 | 9.00E-05 | rs9809237  | NCKIPSD   | NCK interacting protein with SH3 domain [Source:HGNC Symbol;Acc:15486]                    |
| ENS000000213672 | 3_49596462_C_T_b37      | 2.15E-05 | 9.00E-05 | rs7625857  | NCKIPSD   | NCK interacting protein with SH3 domain [Source:HGNC Symbol;Acc:15486]                    |
| ENS000000178252 | 3_49236439_T_G_b37      | 8.06E-10 | 9.00E-05 | rs6808036  | WDR6      | WD repeat domain 6 [Source:HGNC Symbol;Acc:12758]                                         |
| ENS000000178252 | 3_49286618_T_G_b37      | 7.00E-10 | 9.00E-05 | rs4955443  | WDR6      | WD repeat domain 6 [Source:HGNC Symbol;Acc:12758]                                         |
| ENS000000178252 | 3_49443081_T_C_b37      | 6.06E-09 | 9.00E-05 | rs13096474 | WDR6      | WD repeat domain 6 [Source:HGNC Symbol;Acc:12758]                                         |
| ENS000000178252 | 3_49481438_AGGACT_A_b37 | 6.90E-09 | 9.00E-05 | rs60691649 | WDR6      | WD repeat domain 6 [Source:HGNC Symbol;Acc:12758]                                         |
| ENS000000178252 | 3_49516350_G_A_b37      | 6.86E-09 | 9.00E-05 | rs9809237  | WDR6      | WD repeat domain 6 [Source:HGNC Symbol;Acc:12758]                                         |
| ENS000000178252 | 3_49596462_C_T_b37      | 3.36E-09 | 9.00E-05 | rs7625857  | WDR6      | WD repeat domain 6 [Source:HGNC Symbol;Acc:12758]                                         |
| ENS000000178252 | 3_49609477_C_G_b37      | 3.24E-05 | 9.00E-05 | rs1532204  | WDR6      | WD repeat domain 6 [Source:HGNC Symbol;Acc:12758]                                         |
| ENS000000178252 | 3_49609794_G_T_b37      | 3.23E-05 | 9.00E-05 | rs6797299  | WDR6      | WD repeat domain 6 [Source:HGNC Symbol;Acc:12758]                                         |
| ENS000000178252 | 3_49615624_G_T_b37      | 3.25E-05 | 9.00E-05 | rs11130208 | WDR6      | WD repeat domain 6 [Source:HGNC Symbol;Acc:12758]                                         |
| ENS000000067560 | 3_49236439_T_G_b37      | 3.39E-08 | 9.00E-05 | rs6808036  | RHOA      | ras homolog family member A [Source:HGNC Symbol;Acc:667]                                  |
| ENS000000067560 | 3_49286618_T_G_b37      | 3.80E-08 | 9.00E-05 | rs4955443  | RHOA      | ras homolog family member A [Source:HGNC Symbol;Acc:667]                                  |
| ENS000000067560 | 3_49443081_T_C_b37      | 4.63E-09 | 9.00E-05 | rs13096474 | RHOA      | ras homolog family member A [Source:HGNC Symbol;Acc:667]                                  |
| ENS000000067560 | 3_49481438_AGGACT_A_b37 | 5.32E-09 | 9.00E-05 | rs60691649 | RHOA      | ras homolog family member A [Source:HGNC Symbol;Acc:667]                                  |
| ENS000000067560 | 3_49516350_G_A_b37      | 4.03E-09 | 9.00E-05 | rs9809237  | RHOA      | ras homolog family member A [Source:HGNC Symbol;Acc:667]                                  |
| ENS000000067560 | 3_49596462_C_T_b37      | 2.81E-09 | 9.00E-05 | rs7625857  | RHOA      | ras homolog family member A [Source:HGNC Symbol;Acc:667]                                  |
| ENS000000145020 | 3_49236439_T_G_b37      | 4.15E-26 | 9.00E-05 | rs6808036  | AMT       | aminomethyltransferase [Source:HGNC Symbol;Acc:473]                                       |
| ENS000000145020 | 3_49286618_T_G_b37      | 2.51E-26 | 9.00E-05 | rs4955443  | AMT       | aminomethyltransferase [Source:HGNC Symbol;Acc:473]                                       |
| ENS000000145020 | 3_49443081_T_C_b37      | 3.73E-27 | 9.00E-05 | rs13096474 | AMT       | aminomethyltransferase [Source:HGNC Symbol;Acc:473]                                       |
| ENS000000145020 | 3_49481438_AGGACT_A_b37 | 8.07E-27 | 9.00E-05 | rs60691649 | AMT       | aminomethyltransferase [Source:HGNC Symbol;Acc:473]                                       |
| ENS000000145020 | 3_49516350_G_A_b37      | 2.51E-27 | 9.00E-05 | rs9809237  | AMT       | aminomethyltransferase [Source:HGNC Symbol;Acc:473]                                       |
| ENS000000145020 | 3_49596462_C_T_b37      | 4.28E-27 | 9.00E-05 | rs7625857  | AMT       | aminomethyltransferase [Source:HGNC Symbol;Acc:473]                                       |
| ENS000000145020 | 3_49609477_C_G_b37      | 2.06E-14 | 9.00E-05 | rs1532204  | AMT       | aminomethyltransferase [Source:HGNC Symbol;Acc:473]                                       |
| ENS000000145020 | 3_49609794_G_T_b37      | 2.07E-14 | 9.00E-05 | rs6797299  | AMT       | aminomethyltransferase [Source:HGNC Symbol;Acc:473]                                       |
| ENS000000145020 | 3_49615624_G_T_b37      | 2.10E-14 | 9.00E-05 | rs11130208 | AMT       | aminomethyltransferase [Source:HGNC Symbol;Acc:473]                                       |
| ENS000000235261 | 3_49236439_T_G_b37      | 1.06E-10 | 9.00E-05 | rs6808036  | NICN1-AS1 | NICN1 antisense RNA 1 [Source:HGNC Symbol;Acc:40838]                                      |
| ENS000000235261 | 3_49286618_T_G_b37      | 1.30E-10 | 9.00E-05 | rs4955443  | NICN1-AS1 | NICN1 antisense RNA 1 [Source:HGNC Symbol;Acc:40838]                                      |
| ENS000000235261 | 3_49443081_T_C_b37      | 4.57E-09 | 9.00E-05 | rs13096474 | NICN1-AS1 | NICN1 antisense RNA 1 [Source:HGNC Symbol;Acc:40838]                                      |
| ENS000000235261 | 3_49481438_AGGACT_A_b37 | 7.98E-09 | 9.00E-05 | rs60691649 | NICN1-AS1 | NICN1 antisense RNA 1 [Source:HGNC Symbol;Acc:40838]                                      |
| ENS000000235261 | 3_49516350_G_A_b37      | 5.76E-09 | 9.00E-05 | rs9809237  | NICN1-AS1 | NICN1 antisense RNA 1 [Source:HGNC Symbol;Acc:40838]                                      |
| ENS000000235261 | 3_49596462_C_T_b37      | 5.98E-09 | 9.00E-05 | rs7625857  | NICN1-AS1 | NICN1 antisense RNA 1 [Source:HGNC Symbol;Acc:40838]                                      |
| ENS000000235261 | 3_49609477_C_G_b37      | 4.49E-07 | 9.00E-05 | rs1532204  | NICN1-AS1 | NICN1 antisense RNA 1 [Source:HGNC Symbol;Acc:40838]                                      |
| ENS000000235261 | 3_49609794_G_T_b37      | 4.49E-07 | 9.00E-05 | rs6797299  | NICN1-AS1 | NICN1 antisense RNA 1 [Source:HGNC Symbol;Acc:40838]                                      |
| ENS000000235261 | 3_49615624_G_T_b37      | 4.52E-07 | 9.00E-05 | rs11130208 | NICN1-AS1 | NICN1 antisense RNA 1 [Source:HGNC Symbol;Acc:40838]                                      |
| ENS000000145029 | 3_49236439_T_G_b37      | 8.05E-11 | 9.00E-05 | rs6808036  | NICN1     | nicotin 1 [Source:HGNC Symbol;Acc:18317]                                                  |
| ENS000000145029 | 3_49286618_T_G_b37      | 8.64E-11 | 9.00E-05 | rs4955443  | NICN1     | nicotin 1 [Source:HGNC Symbol;Acc:18317]                                                  |
| ENS000000145029 | 3_49443081_T_C_b37      | 2.19E-09 | 9.00E-05 | rs13096474 | NICN1     | nicotin 1 [Source:HGNC Symbol;Acc:18317]                                                  |
| ENS000000145029 | 3_49481438_AGGACT_A_b37 | 2.24E-09 | 9.00E-05 | rs60691649 | NICN1     | nicotin 1 [Source:HGNC Symbol;Acc:18317]                                                  |
| ENS000000145029 | 3_49516350_G_A_b37      | 2.30E-09 | 9.00E-05 | rs9809237  | NICN1     | nicotin 1 [Source:HGNC Symbol;Acc:18317]                                                  |
| ENS000000145029 | 3_49596462_C_T_b37      | 2.23E-09 | 9.00E-05 | rs7625857  | NICN1     | nicotin 1 [Source:HGNC Symbol;Acc:18317]                                                  |
| ENS000000145029 | 3_49609477_C_G_b37      | 3.63E-06 | 9.00E-05 | rs1532204  | NICN1     | nicotin 1 [Source:HGNC Symbol;Acc:18317]                                                  |
| ENS000000145029 | 3_49609794_G_T_b37      | 3.63E-06 | 9.00E-05 | rs6797299  | NICN1     | nicotin 1 [Source:HGNC Symbol;Acc:18317]                                                  |
| ENS000000145029 | 3_49615624_G_T_b37      | 3.67E-06 | 9.00E-05 | rs11130208 | NICN1     | nicotin 1 [Source:HGNC Symbol;Acc:18317]                                                  |
| ENS000000185614 | 3_49236439_T_G_b37      | 2.42E-05 | 9.00E-05 | rs6808036  | FAM212A   | family with sequence similarity 212, member A [Source:HGNC Symbol;Acc:32480]              |
| ENS000000185614 | 3_49286618_T_G_b37      | 3.77E-05 | 9.00E-05 | rs4955443  | FAM212A   | family with sequence similarity 212, member A [Source:HGNC Symbol;Acc:32480]              |
| ENS000000185614 | 3_49443081_T_C_b37      | 5.99E-05 | 9.00E-05 | rs13096474 | FAM212A   | family with sequence similarity 212, member A [Source:HGNC Symbol;Acc:32480]              |
| ENS000000185614 | 3_49481438_AGGACT_A_b37 | 4.93E-05 | 9.00E-05 | rs60691649 | FAM212A   | family with sequence similarity 212, member A [Source:HGNC Symbol;Acc:32480]              |
| ENS000000185614 | 3_49516350_G_A_b37      | 5.41E-05 | 9.00E-05 | rs9809237  | FAM212A   | family with sequence similarity 212, member A [Source:HGNC Symbol;Acc:32480]              |
| ENS000000185614 | 3_49596462_C_T_b37      | 5.85E-05 | 9.00E-05 | rs7625857  | FAM212A   | family with sequence similarity 212, member A [Source:HGNC Symbol;Acc:32480]              |
| ENS000000185614 | 3_49609477_C_G_b37      | 7.70E-07 | 9.00E-05 | rs1532204  | FAM212A   | family with sequence similarity 212, member A [Source:HGNC Symbol;Acc:32480]              |
| ENS000000185614 | 3_49609794_G_T_b37      | 7.70E-07 | 9.00E-05 | rs6797299  | FAM212A   | family with sequence similarity 212, member A [Source:HGNC Symbol;Acc:32480]              |
| ENS000000185614 | 3_49615624_G_T_b37      | 7.74E-07 | 9.00E-05 | rs11130208 | FAM212A   | family with sequence similarity 212, member A [Source:HGNC Symbol;Acc:32480]              |
| ENS000000004534 | 3_50152491_C_T_b37      | 3.16E-09 | 9.00E-05 | rs62263602 | RBM6      | RNA binding motif protein 6 [Source:HGNC Symbol;Acc:9903]                                 |
| ENS000000004534 | 3_50224562_G_T_b37      | 3.04E-07 | 9.00E-05 | rs12637671 | RBM6      | RNA binding motif protein 6 [Source:HGNC Symbol;Acc:9903]                                 |
| ENS000000170322 | 11_129707902_C_A_b37    | 2.06E-06 | 9.00E-05 | rs61916118 | NFRKB     | nuclear factor related to kappaB binding protein [Source:HGNC Symbol;Acc:7802]            |
| ENS000000170322 | 11_129710515_C_T_b37    | 3.60E-06 | 9.00E-05 | rs5992343  | NFRKB     | nuclear factor related to kappaB binding protein [Source:HGNC Symbol;Acc:7802]            |
| ENS000000178977 | 17_8169006_T_C_b37      | 4.90E-05 | 9.00E-05 | rs11655563 | LINC00324 | long intergenic non-protein coding RNA 324 [Source:HGNC Symbol;Acc:26628]                 |
| ENS000000213672 | 3_49289878_T_G_b37      | 1.79E-05 | 1.00E-04 | rs4384984  | NCKIPSD   | NCK interacting protein with SH3 domain [Source:HGNC Symbol;Acc:15486]                    |
| ENS000000213672 | 3_49400482_T_C_b37      | 1.03E-05 | 1.00E-04 | rs974495   | NCKIPSD   | NCK interacting protein with SH3 domain [Source:HGNC Symbol;Acc:15486]                    |
| ENS000000213672 | 3_49584745_A_G_b37      | 2.15E-05 | 1.00E-04 | rs3870341  | NCKIPSD   | NCK interacting protein with SH3 domain [Source:HGNC Symbol;Acc:15486]                    |
| ENS000000178252 | 3_49289878_T_G_b37      | 6.83E-10 | 1.00E-04 | rs4384984  | WDR6      | WD repeat domain 6 [Source:HGNC Symbol;Acc:12758]                                         |
| ENS000000178252 | 3_49400482_T_C_b37      | 2.97E-09 | 1.00E-04 | rs974495   | WDR6      | WD repeat domain 6 [Source:HGNC Symbol;Acc:12758]                                         |
| ENS000000178252 | 3_49584745_A_G_b37      | 3.37E-09 | 1.00E-04 | rs3870341  | WDR6      | WD repeat domain 6 [Source:HGNC Symbol;Acc:12758]                                         |
| ENS000000067560 | 3_49289878_T_G_b37      | 3.90E-08 | 1.00E-04 | rs4384984  | RHOA      | ras homolog family member A [Source:HGNC Symbol;Acc:667]                                  |
| ENS000000067560 | 3_49400482_T_C_b37      | 2.49E-09 | 1.00E-04 | rs974495   | RHOA      | ras homolog family member A [Source:HGNC Symbol;Acc:667]                                  |
| ENS000000067560 | 3_49584745_A_G_b37      | 2.81E-09 | 1.00E-04 | rs3870341  | RHOA      | ras homolog family member A [Source:HGNC Symbol;Acc:667]                                  |
| ENS000000145020 | 3_49289878_T_G_b37      | 2.47E-26 | 1.00E-04 | rs4384984  | AMT       | aminomethyltransferase [Source:HGNC Symbol;Acc:473]                                       |
| ENS000000145020 | 3_49400482_T_C_b37      | 8.88E-27 | 1.00E-04 | rs974495   | AMT       | aminomethyltransferase [Source:HGNC Symbol;Acc:473]                                       |
| ENS000000145020 | 3_49584745_A_G_b37      | 4.28E-27 | 1.00E-04 | rs3870341  | AMT       | aminomethyltransferase [Source:HGNC Symbol;Acc:473]                                       |
| ENS000000145020 | 3_49624095_T_G_b37      | 1.56E-13 | 1.00E-04 | rs9869256  | AMT       | aminomethyltransferase [Source:HGNC Symbol;Acc:473]                                       |
| ENS000000145020 | 3_49632628_T_C_b37      | 2.48E-11 | 1.00E-04 | rs2329022  | AMT       | aminomethyltransferase [Source:HGNC Symbol;Acc:473]                                       |
| ENS000000145020 | 3_49917686_G_A_b37      | 1.35E-05 | 1.00E-04 | rs62262061 | AMT       | aminomethyltransferase [Source:HGNC Symbol;Acc:473]                                       |
| ENS000000235261 | 3_49289878_T_G_b37      | 1.33E-10 | 1.00E-04 | rs4384984  | NICN1-AS1 | NICN1 antisense RNA 1 [Source:HGNC Symbol;Acc:40838]                                      |
| ENS000000235261 | 3_49400482_T_C_b37      | 2.54E-09 | 1.00E-04 | rs974495   | NICN1-AS1 | NICN1 antisense RNA 1 [Source:HGNC Symbol;Acc:40838]                                      |
| ENS000000235261 | 3_49584745_A_G_b37      | 5.98E-09 | 1.00E-04 | rs3870341  | NICN1-AS1 | NICN1 antisense RNA 1 [Source:HGNC Symbol;Acc:40838]                                      |
| ENS000000235261 | 3_49624095_T_G_b37      | 1.78E-05 | 1.00E-04 | rs9869256  | NICN1-AS1 | NICN1 antisense RNA 1 [Source:HGNC Symbol;Acc:40838]                                      |
| ENS000000145029 | 3_49289878_T_G_b37      | 8.79E-11 | 1.00E-04 | rs4384984  | NICN1     | nicotin 1 [Source:HGNC Symbol;Acc:18317]                                                  |
| ENS000000145029 | 3_49400482_T_C_b37      | 1.14E-09 | 1.00E-04 | rs974495   | NICN1     | nicotin 1 [Source:HGNC Symbol;Acc:18317]                                                  |
| ENS000000145029 | 3_49584745_A_G_b37      | 2.23E-09 | 1.00E-04 | rs3870341  | NICN1     | nicotin 1 [Source:HGNC Symbol;Acc:18317]                                                  |
| ENS000000145029 | 3_49624095_T_G_b37      | 3.83E-05 | 1.00E-04 | rs9869256  | NICN1     | nicotin 1 [Source:HGNC Symbol;Acc:18317]                                                  |
| ENS000000145029 | 3_49632628_T_C_b37      | 2.67E-05 | 1.00E-04 | rs2329022  | NICN1     | nicotin 1 [Source:HGNC Symbol;Acc:18317]                                                  |
| ENS000000185614 | 3_49289878_T_G_b37      | 3.92E-05 | 1.00E-04 | rs4384984  | FAM212A   | family with sequence similarity 212, member A [Source:HGNC Symbol;Acc:32480]              |
| ENS000000185614 | 3_49400482_T_C_b37      | 3.36E-05 | 1.00E-04 | rs974495   | FAM2      |                                                                                           |

|                |                      |          |            |             |               |                                                                                           |
|----------------|----------------------|----------|------------|-------------|---------------|-------------------------------------------------------------------------------------------|
| ENS00000170322 | 11_129686195_G_A_b37 | 3.88E-06 | 0.000109   | rs11221861  | NFRKB         | nuclear factor related to kappaB binding protein [Source:HGNC Symbol;Acc:7802]            |
| ENS00000232112 | 3_49276077_C_T_b37   | 7.58E-05 | 0.00010999 | rs10154992  | TMA7          | translation machinery associated 7 homolog (S. cerevisiae) [Source:HGNC Symbol;Acc:26932] |
| ENS00000213672 | 3_49276077_C_T_b37   | 2.77E-05 | 0.00010999 | rs10154992  | NCKIPSD       | NCK interacting protein with SH3 domain [Source:HGNC Symbol;Acc:15486]                    |
| ENS00000213672 | 3_49442020_A_G_b37   | 1.48E-05 | 0.00010999 | rs11715060  | NCKIPSD       | NCK interacting protein with SH3 domain [Source:HGNC Symbol;Acc:15486]                    |
| ENS00000178252 | 3_49276077_C_T_b37   | 1.21E-09 | 0.00010999 | rs10154992  | WDR6          | WD repeat domain 6 [Source:HGNC Symbol;Acc:12758]                                         |
| ENS00000178252 | 3_49442020_A_G_b37   | 7.17E-09 | 0.00010999 | rs11715060  | WDR6          | WD repeat domain 6 [Source:HGNC Symbol;Acc:12758]                                         |
| ENS00000178252 | 3_49753788_A_G_b37   | 3.36E-05 | 0.00010999 | rs11720705  | WDR6          | WD repeat domain 6 [Source:HGNC Symbol;Acc:12758]                                         |
| ENS00000114316 | 3_49753788_A_G_b37   | 7.17E-05 | 0.00010999 | rs11720705  | USP4          | ubiquitin specific peptidase 4 (proto-oncogene) [Source:HGNC Symbol;Acc:12627]            |
| ENS00000067560 | 3_49276077_C_T_b37   | 2.65E-08 | 0.00010999 | rs10154992  | RHOA          | ras homolog family member A [Source:HGNC Symbol;Acc:667]                                  |
| ENS00000067560 | 3_49442020_A_G_b37   | 4.69E-09 | 0.00010999 | rs11715060  | RHOA          | ras homolog family member A [Source:HGNC Symbol;Acc:667]                                  |
| ENS00000145020 | 3_49276077_C_T_b37   | 5.57E-26 | 0.00010999 | rs10154992  | AMT           | aminomethyltransferase [Source:HGNC Symbol;Acc:473]                                       |
| ENS00000145020 | 3_49442020_A_G_b37   | 5.21E-27 | 0.00010999 | rs11715060  | AMT           | aminomethyltransferase [Source:HGNC Symbol;Acc:473]                                       |
| ENS00000145020 | 3_49753788_A_G_b37   | 1.40E-10 | 0.00010999 | rs11720705  | AMT           | aminomethyltransferase [Source:HGNC Symbol;Acc:473]                                       |
| ENS00000235261 | 3_49276077_C_T_b37   | 1.13E-10 | 0.00010999 | rs10154992  | NICN1-AS1     | NICN1 antisense RNA 1 [Source:HGNC Symbol;Acc:40838]                                      |
| ENS00000235261 | 3_49442020_A_G_b37   | 5.00E-09 | 0.00010999 | rs11715060  | NICN1-AS1     | NICN1 antisense RNA 1 [Source:HGNC Symbol;Acc:40838]                                      |
| ENS00000235261 | 3_49753788_A_G_b37   | 3.52E-05 | 0.00010999 | rs11720705  | NICN1-AS1     | NICN1 antisense RNA 1 [Source:HGNC Symbol;Acc:40838]                                      |
| ENS00000145029 | 3_49276077_C_T_b37   | 7.62E-11 | 0.00010999 | rs10154992  | NICN1         | nicotin 1 [Source:HGNC Symbol;Acc:18317]                                                  |
| ENS00000145029 | 3_49442020_A_G_b37   | 2.42E-09 | 0.00010999 | rs11715060  | NICN1         | nicotin 1 [Source:HGNC Symbol;Acc:18317]                                                  |
| ENS00000145029 | 3_49753788_A_G_b37   | 5.45E-05 | 0.00010999 | rs11720705  | NICN1         | nicotin 1 [Source:HGNC Symbol;Acc:18317]                                                  |
| ENS00000185614 | 3_49276077_C_T_b37   | 2.45E-05 | 0.00010999 | rs10154992  | FAM212A       | family with sequence similarity 212, member A [Source:HGNC Symbol;Acc:32480]              |
| ENS00000185614 | 3_49442020_A_G_b37   | 4.40E-05 | 0.00010999 | rs11715060  | FAM212A       | family with sequence similarity 212, member A [Source:HGNC Symbol;Acc:32480]              |
| ENS00000185614 | 3_49753788_A_G_b37   | 1.42E-06 | 0.00010999 | rs11720705  | FAM212A       | family with sequence similarity 212, member A [Source:HGNC Symbol;Acc:32480]              |
| ENS00000004534 | 3_50044006_T_A_b37   | 4.90E-10 | 0.00010999 | rs7635601   | RBM6          | RNA binding motif protein 6 [Source:HGNC Symbol;Acc:9903]                                 |
| ENS00000004534 | 3_50049958_G_T_b37   | 1.48E-11 | 0.00010999 | rs7645466   | RBM6          | RNA binding motif protein 6 [Source:HGNC Symbol;Acc:9903]                                 |
| ENS00000120256 | 6_150003180_G_A_b37  | 1.22E-05 | 0.00010999 | rs147884962 | LRP11         | low density lipoprotein receptor-related protein 11 [Source:HGNC Symbol;Acc:16936]        |
| ENS00000147894 | 9_27585721_G_C_b37   | 1.33E-06 | 0.00010999 | rs700823    | C9orf72       | chromosome 9 open reading frame 72 [Source:HGNC Symbol;Acc:28337]                         |
| ENS00000225213 | 10_16749526_G_T_b37  | 2.06E-05 | 0.00010999 | rs3951063   | RP11-197M22.2 |                                                                                           |
| ENS00000264247 | 18_72385570_A_G_b37  | 1.22E-10 | 0.00010999 | rs7244762   | LINC00909     | long intergenic non-protein coding RNA 909 [Source:HGNC Symbol;Acc:44331]                 |
| ENS00000232112 | 3_49275828_A_G_b37   | 9.72E-05 | 0.00010999 | rs11130186  | TMA7          | translation machinery associated 7 homolog (S. cerevisiae) [Source:HGNC Symbol;Acc:26932] |
| ENS00000213672 | 3_49275828_A_G_b37   | 2.86E-05 | 0.00010999 | rs11130186  | NCKIPSD       | NCK interacting protein with SH3 domain [Source:HGNC Symbol;Acc:15486]                    |
| ENS00000213672 | 3_49483074_A_G_b37   | 1.25E-05 | 0.00010999 | rs57273516  | NCKIPSD       | NCK interacting protein with SH3 domain [Source:HGNC Symbol;Acc:15486]                    |
| ENS00000178252 | 3_49275828_A_G_b37   | 1.65E-09 | 0.00010999 | rs11130186  | WDR6          | WD repeat domain 6 [Source:HGNC Symbol;Acc:12758]                                         |
| ENS00000178252 | 3_49483074_A_G_b37   | 6.10E-09 | 0.00010999 | rs57273516  | WDR6          | WD repeat domain 6 [Source:HGNC Symbol;Acc:12758]                                         |
| ENS00000067560 | 3_49275828_A_G_b37   | 2.29E-08 | 0.00010999 | rs11130186  | RHOA          | ras homolog family member A [Source:HGNC Symbol;Acc:667]                                  |
| ENS00000067560 | 3_49483074_A_G_b37   | 4.66E-09 | 0.00010999 | rs57273516  | RHOA          | ras homolog family member A [Source:HGNC Symbol;Acc:667]                                  |
| ENS00000067560 | 3_49626306_G_A_b37   | 4.56E-05 | 0.00010999 | rs6446285   | RHOA          | ras homolog family member A [Source:HGNC Symbol;Acc:667]                                  |
| ENS00000145020 | 3_49275828_A_G_b37   | 2.70E-25 | 0.00010999 | rs11130186  | AMT           | aminomethyltransferase [Source:HGNC Symbol;Acc:473]                                       |
| ENS00000145020 | 3_49483074_A_G_b37   | 3.97E-27 | 0.00010999 | rs57273516  | AMT           | aminomethyltransferase [Source:HGNC Symbol;Acc:473]                                       |
| ENS00000145020 | 3_49626306_G_A_b37   | 3.65E-13 | 0.00010999 | rs6446285   | AMT           | aminomethyltransferase [Source:HGNC Symbol;Acc:473]                                       |
| ENS00000145020 | 3_50101468_G_A_b37   | 9.61E-05 | 0.00010999 | rs13097720  | AMT           | aminomethyltransferase [Source:HGNC Symbol;Acc:473]                                       |
| ENS00000235261 | 3_49275828_A_G_b37   | 2.01E-10 | 0.00010999 | rs11130186  | NICN1-AS1     | NICN1 antisense RNA 1 [Source:HGNC Symbol;Acc:40838]                                      |
| ENS00000235261 | 3_49483074_A_G_b37   | 4.82E-09 | 0.00010999 | rs57273516  | NICN1-AS1     | NICN1 antisense RNA 1 [Source:HGNC Symbol;Acc:40838]                                      |
| ENS00000235261 | 3_49626306_G_A_b37   | 1.16E-05 | 0.00010999 | rs6446285   | NICN1-AS1     | NICN1 antisense RNA 1 [Source:HGNC Symbol;Acc:40838]                                      |
| ENS00000145029 | 3_49275828_A_G_b37   | 8.59E-11 | 0.00010999 | rs11130186  | NICN1         | nicotin 1 [Source:HGNC Symbol;Acc:18317]                                                  |
| ENS00000145029 | 3_49483074_A_G_b37   | 2.30E-09 | 0.00010999 | rs57273516  | NICN1         | nicotin 1 [Source:HGNC Symbol;Acc:18317]                                                  |
| ENS00000145029 | 3_49626306_G_A_b37   | 4.45E-05 | 0.00010999 | rs6446285   | NICN1         | nicotin 1 [Source:HGNC Symbol;Acc:18317]                                                  |
| ENS00000185614 | 3_49275828_A_G_b37   | 1.51E-05 | 0.00010999 | rs11130186  | FAM212A       | family with sequence similarity 212, member A [Source:HGNC Symbol;Acc:32480]              |
| ENS00000185614 | 3_49483074_A_G_b37   | 5.39E-05 | 0.00010999 | rs57273516  | FAM212A       | family with sequence similarity 212, member A [Source:HGNC Symbol;Acc:32480]              |
| ENS00000185614 | 3_49626306_G_A_b37   | 2.38E-06 | 0.00010999 | rs6446285   | FAM212A       | family with sequence similarity 212, member A [Source:HGNC Symbol;Acc:32480]              |
| ENS00000004534 | 3_50101468_G_A_b37   | 3.37E-09 | 0.00010999 | rs13097720  | RBM6          | RNA binding motif protein 6 [Source:HGNC Symbol;Acc:9903]                                 |
| ENS00000225213 | 10_16756849_T_C_b37  | 7.60E-05 | 0.00010999 | rs4747283   | RP11-197M22.2 |                                                                                           |
| ENS00000178977 | 17_8174893_G_A_b37   | 5.57E-05 | 0.00010999 | rs7225429   | LINC00324     | long intergenic non-protein coding RNA 324 [Source:HGNC Symbol;Acc:26628]                 |
| ENS00000264247 | 18_72381941_C_T_b37  | 2.78E-10 | 0.00010999 | rs10221304  | LINC00909     | long intergenic non-protein coding RNA 909 [Source:HGNC Symbol;Acc:44331]                 |
| ENS00000232112 | 3_49255172_T_C_b37   | 8.27E-05 | 0.00010999 | rs2082923   | TMA7          | translation machinery associated 7 homolog (S. cerevisiae) [Source:HGNC Symbol;Acc:26932] |
| ENS00000213672 | 3_49255172_T_C_b37   | 2.56E-05 | 0.00010999 | rs2082923   | NCKIPSD       | NCK interacting protein with SH3 domain [Source:HGNC Symbol;Acc:15486]                    |
| ENS00000213672 | 3_49432321_C_T_b37   | 1.32E-05 | 0.00010999 | rs10155014  | NCKIPSD       | NCK interacting protein with SH3 domain [Source:HGNC Symbol;Acc:15486]                    |
| ENS00000178252 | 3_49255172_T_C_b37   | 1.26E-09 | 0.00010999 | rs2082923   | WDR6          | WD repeat domain 6 [Source:HGNC Symbol;Acc:12758]                                         |
| ENS00000178252 | 3_49432321_C_T_b37   | 6.05E-09 | 0.00010999 | rs10155014  | WDR6          | WD repeat domain 6 [Source:HGNC Symbol;Acc:12758]                                         |
| ENS00000178252 | 3_49739507_G_C_b37   | 3.83E-05 | 0.00010999 | rs1491985   | WDR6          | WD repeat domain 6 [Source:HGNC Symbol;Acc:12758]                                         |
| ENS00000178252 | 3_49745235_G_A_b37   | 3.83E-05 | 0.00010999 | rs11709734  | WDR6          | WD repeat domain 6 [Source:HGNC Symbol;Acc:12758]                                         |
| ENS00000114316 | 3_49739507_G_C_b37   | 7.13E-05 | 0.00010999 | rs1491985   | USP4          | ubiquitin specific peptidase 4 (proto-oncogene) [Source:HGNC Symbol;Acc:12627]            |
| ENS00000114316 | 3_49745235_G_A_b37   | 7.13E-05 | 0.00010999 | rs11709734  | USP4          | ubiquitin specific peptidase 4 (proto-oncogene) [Source:HGNC Symbol;Acc:12627]            |
| ENS00000067560 | 3_49255172_T_C_b37   | 3.32E-08 | 0.00010999 | rs2082923   | RHOA          | ras homolog family member A [Source:HGNC Symbol;Acc:667]                                  |
| ENS00000067560 | 3_49432321_C_T_b37   | 4.63E-09 | 0.00010999 | rs10155014  | RHOA          | ras homolog family member A [Source:HGNC Symbol;Acc:667]                                  |
| ENS00000145020 | 3_49255172_T_C_b37   | 4.80E-26 | 0.00010999 | rs2082923   | AMT           | aminomethyltransferase [Source:HGNC Symbol;Acc:473]                                       |
| ENS00000145020 | 3_49432321_C_T_b37   | 3.71E-27 | 0.00010999 | rs10155014  | AMT           | aminomethyltransferase [Source:HGNC Symbol;Acc:473]                                       |
| ENS00000145020 | 3_49739507_G_C_b37   | 1.53E-10 | 0.00010999 | rs1491985   | AMT           | aminomethyltransferase [Source:HGNC Symbol;Acc:473]                                       |
| ENS00000145020 | 3_49745235_G_A_b37   | 1.53E-10 | 0.00010999 | rs11709734  | AMT           | aminomethyltransferase [Source:HGNC Symbol;Acc:473]                                       |
| ENS00000235261 | 3_49255172_T_C_b37   | 9.62E-11 | 0.00010999 | rs2082923   | NICN1-AS1     | NICN1 antisense RNA 1 [Source:HGNC Symbol;Acc:40838]                                      |
| ENS00000235261 | 3_49432321_C_T_b37   | 4.57E-09 | 0.00010999 | rs10155014  | NICN1-AS1     | NICN1 antisense RNA 1 [Source:HGNC Symbol;Acc:40838]                                      |
| ENS00000235261 | 3_49739507_G_C_b37   | 2.02E-05 | 0.00010999 | rs1491985   | NICN1-AS1     | NICN1 antisense RNA 1 [Source:HGNC Symbol;Acc:40838]                                      |
| ENS00000235261 | 3_49745235_G_A_b37   | 2.02E-05 | 0.00010999 | rs11709734  | NICN1-AS1     | NICN1 antisense RNA 1 [Source:HGNC Symbol;Acc:40838]                                      |
| ENS00000145029 | 3_49255172_T_C_b37   | 6.49E-11 | 0.00010999 | rs2082923   | NICN1         | NICN1 antisense RNA 1 [Source:HGNC Symbol;Acc:40838]                                      |
| ENS00000145029 | 3_49432321_C_T_b37   | 2.19E-09 | 0.00010999 | rs10155014  | NICN1         | nicotin 1 [Source:HGNC Symbol;Acc:18317]                                                  |
| ENS00000145029 | 3_49739507_G_C_b37   | 3.72E-05 | 0.00010999 | rs1491985   | NICN1         | nicotin 1 [Source:HGNC Symbol;Acc:18317]                                                  |
| ENS00000145029 | 3_49745235_G_A_b37   | 3.72E-05 | 0.00010999 | rs11709734  | NICN1         | nicotin 1 [Source:HGNC Symbol;Acc:18317]                                                  |
| ENS00000185614 | 3_49255172_T_C_b37   | 2.40E-05 | 0.00010999 | rs2082923   | FAM212A       | family with sequence similarity 212, member A [Source:HGNC Symbol;Acc:32480]              |
| ENS00000185614 | 3_49432321_C_T_b37   | 5.97E-05 | 0.00010999 | rs10155014  | FAM212A       | family with sequence similarity 212, member A [Source:HGNC Symbol;Acc:32480]              |
| ENS00000185614 | 3_49739507_G_C_b37   | 1.42E-06 | 0.00010999 | rs1491985   | FAM212A       | family with sequence similarity 212, member A [Source:HGNC Symbol;Acc:32480]              |
| ENS00000185614 | 3_49745235_G_A_b37   | 1.42E-06 | 0.00010999 | rs11709734  | FAM212A       | family with sequence similarity 212, member A [Source:HGNC Symbol;Acc:32480]              |
| ENS00000178977 | 17_8183852_C_G_b37   | 6.52E-05 | 0.00010999 | rs11652212  | LINC00324     | long intergenic non-protein coding RNA 324 [Source:HGNC Symbol;Acc:26628]                 |
| ENS00000232112 | 3_48412264_CG_C_b37  | 1.52E-08 | 0.00010999 | rs35404483  | TMA7          | translation machinery associated 7 homolog (S. cerevisiae) [Source:HGNC Symbol;Acc:26932] |
| ENS00000244380 | 3_48412264_CG_C_b37  | 8.84E-07 | 0.00010999 | rs35404483  | RP11-24C3.2   |                                                                                           |
| ENS00000213672 | 3_48412264_CG_C_b37  | 1.88E-05 | 0.00010999 | rs35404483  | NCKIPSD       | NCK interacting protein with SH3 domain [Source:HGNC Symbol;Acc:15486]                    |
| ENS00000213672 | 3_49409002_G_C_b37   | 1.30E-05 | 0.00010999 | rs11719762  | NCKIPSD       | NCK interacting protein with SH3 domain [Source:HGNC Symbol;Acc:15486]                    |
| ENS00000213672 | 3_49536863_T_A_b37   | 1.30E-05 | 0.00010999 | rs3870339   | NCKIPSD       | NCK interacting protein with SH3 domain [Source:HGNC Symbol;Acc:15486]                    |
| ENS00000178252 | 3_49409002_G_C_b37   | 5.85E-09 | 0.00010999 | rs11719762  | WDR6          | WD repeat domain 6 [Source:HGNC Symbol;Acc:12758]                                         |
| ENS00000178252 | 3_49536863_T_A_b37   | 5.78E-09 | 0.00010999 | rs3870339   | WDR6          | WD repeat domain 6 [Source:HGNC Symbol;Acc:12758]                                         |
| ENS00000067560 | 3_49409002_G_C_b37   | 4.65E-09 | 0.00010999 | rs11719762  | RHOA          | ras homolog family member A [Source:HGNC Symbol;Acc:667]                                  |
| ENS00000067560 | 3_49536863_T_A_b37   | 4.66E-09 | 0.00010999 | rs3870339   | RHOA          | ras homolog family member A [Source:HGNC Symbol;Acc:667]                                  |
| ENS00000145020 | 3_49409002_G_C_b37   | 3.52E-27 | 0.00010999 | rs11719762  | AMT           | aminomethyltransferase [Source:HGNC Symbol;Acc:473]                                       |
| ENS00000145020 | 3_49536863_T_A_b37   | 3.45E-27 | 0.00010999 | rs3870339   | AMT           | aminomethyltransferase [Source:HGNC Symbol;Acc:473]                                       |
| ENS00000235261 | 3_49409002_G_C_b37   | 4.59E-09 | 0.00010999 | rs11719762  | NICN1-AS1     | NICN1 antisense RNA 1 [Source:HGNC Symbol;Acc:40838]                                      |
| ENS00000235261 | 3_49536863_T_A_b37   | 4.60E-09 | 0.00010999 | rs3870339   | NICN1-AS1     | NICN1 antisense RNA 1 [Source:HGNC Symbol;Acc:40838]                                      |
| ENS00000145029 | 3_49409002_G_C_b37   | 2.14E-09 | 0.00010999 | rs11719762  | NICN1         | nicotin 1 [Source:HGNC Symbol;Acc:18317]                                                  |
| ENS00000145029 | 3_49536863_T_A_b37   | 2.13E-09 | 0.00010999 | rs3870339   | NICN1         | nicotin 1 [Source:HGNC Symbol;Acc:18317]                                                  |
| ENS00000185614 | 3_49409002_G_C_b37   | 5.83E-05 | 0.00010999 | rs11719762  | FAM212A       | family with sequence similarity 212, member A [Source:HGNC Symbol;Acc:32480]              |
| ENS00000185614 | 3_49536863_T_A_b37   | 5.78E-05 | 0.00010999 | rs3870339   | FAM212A       | family with sequence similarity 212, member A [Source:HGNC Symbol;Acc:32480]              |
| ENS00000232112 | 3_49218888_G_A_b37   | 2.87E-05 | 0.00010999 | rs4955421   | TMA7          | translation machinery associated 7 homolog (S. cerevisiae) [Source:HGNC Symbol;Acc:26932] |
| ENS00000232112 | 3_49222904_T_C_b37   | 1.91E-05 | 0.00010999 | rs7432077   | TMA7          | translation machinery associated 7 homolog (S. cerevisiae) [Source:HGNC Symbol;Acc:26932] |
| ENS00000213672 | 3_49218888_G_A_b37   | 1.60E-05 | 0.00010999 | rs4955421   | NCKIPSD       | NCK interacting protein with SH3 domain [Source:HGNC Symbol;Acc:15486]                    |
| ENS00000213672 | 3_49222904_T_C_b37   | 7.41E-05 | 0.00010999 | rs7432077   | NCKIPSD       | NCK interacting protein with SH3 domain [Source:HGNC Symbol;Acc:15486]                    |
| ENS00000178252 | 3_49218888_G_A_b37   | 7.89E-10 | 0.00010999 | rs4955421   | WDR6          | WD repeat domain 6 [Source:HGNC Symbol;Acc:12758]                                         |
| ENS00000178252 | 3_49222904_T_C_b37   | 1.31E-09 | 0.00010999 | rs7432077   | WDR6          | WD repeat domain 6 [Source:HGNC Symbol;Acc:12758]                                         |
| ENS000         |                      |          |            |             |               |                                                                                           |

|                  |                     |          |             |            |               |                                                                                           |
|------------------|---------------------|----------|-------------|------------|---------------|-------------------------------------------------------------------------------------------|
| ENS000000185614  | 3_49222904_T_C_b37  | 9.92E-06 | 0.000149999 | rs7432077  | FAM212A       | family with sequence similarity 212, member A [Source:HGNC Symbol;Acc:32480]              |
| ENS000000004534  | 3_50031840_C_T_b37  | 4.52E-10 | 0.000149999 | rs35012435 | RBM6          | RNA binding motif protein 6 [Source:HGNC Symbol;Acc:9903]                                 |
| ENS000000273035  | 2_39647221_T_C_b37  | 1.73E-05 | 0.000149999 | rs7598583  | RP11-449G16.1 |                                                                                           |
| ENS0000000213672 | 3_49460350_A_G_b37  | 1.35E-05 | 0.000159998 | rs1464569  | NCKIPSD       | NCK interacting protein with SH3 domain [Source:HGNC Symbol;Acc:15486]                    |
| ENS0000000213672 | 3_49521549_G_A_b37  | 1.30E-05 | 0.000159998 | rs1009051  | NCKIPSD       | NCK interacting protein with SH3 domain [Source:HGNC Symbol;Acc:15486]                    |
| ENS0000000178252 | 3_49460350_A_G_b37  | 3.72E-09 | 0.000159998 | rs1464569  | WDR6          | WD repeat domain 6 [Source:HGNC Symbol;Acc:12758]                                         |
| ENS0000000178252 | 3_49521549_G_A_b37  | 5.78E-09 | 0.000159998 | rs1009051  | WDR6          | WD repeat domain 6 [Source:HGNC Symbol;Acc:12758]                                         |
| ENS0000000178252 | 3_49657441_A_G_b37  | 5.28E-05 | 0.000159998 | rs4855833  | WDR6          | WD repeat domain 6 [Source:HGNC Symbol;Acc:12758]                                         |
| ENS0000000178252 | 3_49769071_C_T_b37  | 8.83E-05 | 0.000159998 | rs9870858  | WDR6          | WD repeat domain 6 [Source:HGNC Symbol;Acc:12758]                                         |
| ENS0000000114316 | 3_49769071_C_T_b37  | 7.13E-05 | 0.000159998 | rs9870858  | USP4          | ubiquitin specific peptidase 4 (proto-oncogene) [Source:HGNC Symbol;Acc:12627]            |
| ENS0000000067560 | 3_49460350_A_G_b37  | 1.73E-09 | 0.000159998 | rs1464569  | RHOA          | ras homolog family member A [Source:HGNC Symbol;Acc:667]                                  |
| ENS0000000067560 | 3_49521549_G_A_b37  | 4.66E-09 | 0.000159998 | rs1009051  | RHOA          | ras homolog family member A [Source:HGNC Symbol;Acc:667]                                  |
| ENS0000000145020 | 3_49460350_A_G_b37  | 2.13E-26 | 0.000159998 | rs1464569  | AMT           | aminomethyltransferase [Source:HGNC Symbol;Acc:473]                                       |
| ENS0000000145020 | 3_49521549_G_A_b37  | 3.45E-27 | 0.000159998 | rs1009051  | AMT           | aminomethyltransferase [Source:HGNC Symbol;Acc:473]                                       |
| ENS0000000145020 | 3_49657441_A_G_b37  | 1.60E-09 | 0.000159998 | rs4855833  | AMT           | aminomethyltransferase [Source:HGNC Symbol;Acc:473]                                       |
| ENS0000000145020 | 3_49769071_C_T_b37  | 1.53E-10 | 0.000159998 | rs9870858  | AMT           | aminomethyltransferase [Source:HGNC Symbol;Acc:473]                                       |
| ENS0000000235261 | 3_49460350_A_G_b37  | 3.47E-09 | 0.000159998 | rs1464569  | NICN1-AS1     | NICN1 antisense RNA 1 [Source:HGNC Symbol;Acc:40838]                                      |
| ENS0000000235261 | 3_49521549_G_A_b37  | 4.60E-09 | 0.000159998 | rs1009051  | NICN1-AS1     | NICN1 antisense RNA 1 [Source:HGNC Symbol;Acc:40838]                                      |
| ENS0000000235261 | 3_49769071_C_T_b37  | 2.02E-05 | 0.000159998 | rs9870858  | NICN1-AS1     | NICN1 antisense RNA 1 [Source:HGNC Symbol;Acc:40838]                                      |
| ENS0000000145029 | 3_49460350_A_G_b37  | 3.00E-09 | 0.000159998 | rs1464569  | NICN1         | nicotin 1 [Source:HGNC Symbol;Acc:18317]                                                  |
| ENS0000000145029 | 3_49521549_G_A_b37  | 2.13E-09 | 0.000159998 | rs1009051  | NICN1         | nicotin 1 [Source:HGNC Symbol;Acc:18317]                                                  |
| ENS0000000145029 | 3_49769071_C_T_b37  | 3.72E-05 | 0.000159998 | rs9870858  | NICN1         | nicotin 1 [Source:HGNC Symbol;Acc:18317]                                                  |
| ENS0000000185614 | 3_49460350_A_G_b37  | 5.00E-05 | 0.000159998 | rs1464569  | FAM212A       | family with sequence similarity 212, member A [Source:HGNC Symbol;Acc:32480]              |
| ENS0000000185614 | 3_49521549_G_A_b37  | 5.78E-05 | 0.000159998 | rs1009051  | FAM212A       | family with sequence similarity 212, member A [Source:HGNC Symbol;Acc:32480]              |
| ENS0000000185614 | 3_49657441_A_G_b37  | 9.44E-07 | 0.000159998 | rs4855833  | FAM212A       | family with sequence similarity 212, member A [Source:HGNC Symbol;Acc:32480]              |
| ENS0000000185614 | 3_49769071_C_T_b37  | 1.42E-06 | 0.000159998 | rs9870858  | FAM212A       | family with sequence similarity 212, member A [Source:HGNC Symbol;Acc:32480]              |
| ENS000000004534  | 3_49657441_A_G_b37  | 4.37E-05 | 0.000159998 | rs4855833  | RBM6          | RNA binding motif protein 6 [Source:HGNC Symbol;Acc:9903]                                 |
| ENS000000004534  | 3_50222926_T_A_b37  | 3.31E-07 | 0.000159998 | rs1046956  | RBM6          | RNA binding motif protein 6 [Source:HGNC Symbol;Acc:9903]                                 |
| ENS0000000232112 | 3_49228946_A_G_b37  | 5.91E-05 | 0.000169998 | rs11130183 | TMA7          | translation machinery associated 7 homolog (S. cerevisiae) [Source:HGNC Symbol;Acc:26932] |
| ENS0000000232112 | 3_49269758_G_T_b37  | 7.80E-05 | 0.000169998 | rs2099526  | TMA7          | translation machinery associated 7 homolog (S. cerevisiae) [Source:HGNC Symbol;Acc:26932] |
| ENS0000000213672 | 3_49228946_A_G_b37  | 2.34E-05 | 0.000169998 | rs11130183 | NCKIPSD       | NCK interacting protein with SH3 domain [Source:HGNC Symbol;Acc:15486]                    |
| ENS0000000213672 | 3_49269758_G_T_b37  | 3.43E-05 | 0.000169998 | rs2099526  | NCKIPSD       | NCK interacting protein with SH3 domain [Source:HGNC Symbol;Acc:15486]                    |
| ENS0000000213672 | 3_49412496_A_G_b37  | 7.92E-06 | 0.000169998 | rs6775069  | NCKIPSD       | NCK interacting protein with SH3 domain [Source:HGNC Symbol;Acc:15486]                    |
| ENS0000000213672 | 3_49484992_T_C_b37  | 2.08E-05 | 0.000169998 | rs11923032 | NCKIPSD       | NCK interacting protein with SH3 domain [Source:HGNC Symbol;Acc:15486]                    |
| ENS0000000213672 | 3_49496263_G_A_b37  | 1.28E-05 | 0.000169998 | rs2329025  | NCKIPSD       | NCK interacting protein with SH3 domain [Source:HGNC Symbol;Acc:15486]                    |
| ENS0000000213672 | 3_49518551_A_G_b37  | 8.02E-06 | 0.000169998 | rs7622786  | NCKIPSD       | NCK interacting protein with SH3 domain [Source:HGNC Symbol;Acc:15486]                    |
| ENS0000000213672 | 3_49529601_G_T_b37  | 1.30E-05 | 0.000169998 | rs4855858  | NCKIPSD       | NCK interacting protein with SH3 domain [Source:HGNC Symbol;Acc:15486]                    |
| ENS0000000213672 | 3_49598064_T_C_b37  | 1.80E-05 | 0.000169998 | rs9862534  | NCKIPSD       | NCK interacting protein with SH3 domain [Source:HGNC Symbol;Acc:15486]                    |
| ENS0000000178252 | 3_49228946_A_G_b37  | 6.96E-10 | 0.000169998 | rs11130183 | WDR6          | WD repeat domain 6 [Source:HGNC Symbol;Acc:12758]                                         |
| ENS0000000178252 | 3_49269758_G_T_b37  | 9.66E-10 | 0.000169998 | rs2099526  | WDR6          | WD repeat domain 6 [Source:HGNC Symbol;Acc:12758]                                         |
| ENS0000000178252 | 3_49412496_A_G_b37  | 2.93E-09 | 0.000169998 | rs6775069  | WDR6          | WD repeat domain 6 [Source:HGNC Symbol;Acc:12758]                                         |
| ENS0000000178252 | 3_49484992_T_C_b37  | 1.35E-08 | 0.000169998 | rs11923032 | WDR6          | WD repeat domain 6 [Source:HGNC Symbol;Acc:12758]                                         |
| ENS0000000178252 | 3_49496263_G_A_b37  | 5.85E-09 | 0.000169998 | rs2329025  | WDR6          | WD repeat domain 6 [Source:HGNC Symbol;Acc:12758]                                         |
| ENS0000000178252 | 3_49518551_A_G_b37  | 7.64E-09 | 0.000169998 | rs7622786  | WDR6          | WD repeat domain 6 [Source:HGNC Symbol;Acc:12758]                                         |
| ENS0000000178252 | 3_49529601_G_T_b37  | 5.78E-09 | 0.000169998 | rs4855858  | WDR6          | WD repeat domain 6 [Source:HGNC Symbol;Acc:12758]                                         |
| ENS0000000178252 | 3_49598064_T_C_b37  | 1.89E-09 | 0.000169998 | rs9862534  | WDR6          | WD repeat domain 6 [Source:HGNC Symbol;Acc:12758]                                         |
| ENS0000000178252 | 3_49642027_C_T_b37  | 4.87E-05 | 0.000169998 | rs4241405  | WDR6          | WD repeat domain 6 [Source:HGNC Symbol;Acc:12758]                                         |
| ENS0000000067560 | 3_49228946_A_G_b37  | 3.41E-08 | 0.000169998 | rs11130183 | RHOA          | ras homolog family member A [Source:HGNC Symbol;Acc:667]                                  |
| ENS0000000067560 | 3_49269758_G_T_b37  | 2.43E-08 | 0.000169998 | rs2099526  | RHOA          | ras homolog family member A [Source:HGNC Symbol;Acc:667]                                  |
| ENS0000000067560 | 3_49412496_A_G_b37  | 1.22E-08 | 0.000169998 | rs6775069  | RHOA          | ras homolog family member A [Source:HGNC Symbol;Acc:667]                                  |
| ENS0000000067560 | 3_49484992_T_C_b37  | 7.95E-09 | 0.000169998 | rs11923032 | RHOA          | ras homolog family member A [Source:HGNC Symbol;Acc:667]                                  |
| ENS0000000067560 | 3_49496263_G_A_b37  | 4.68E-09 | 0.000169998 | rs2329025  | RHOA          | ras homolog family member A [Source:HGNC Symbol;Acc:667]                                  |
| ENS0000000067560 | 3_49518551_A_G_b37  | 1.22E-08 | 0.000169998 | rs7622786  | RHOA          | ras homolog family member A [Source:HGNC Symbol;Acc:667]                                  |
| ENS0000000067560 | 3_49529601_G_T_b37  | 4.66E-09 | 0.000169998 | rs4855858  | RHOA          | ras homolog family member A [Source:HGNC Symbol;Acc:667]                                  |
| ENS0000000067560 | 3_49598064_T_C_b37  | 3.61E-09 | 0.000169998 | rs9862534  | RHOA          | ras homolog family member A [Source:HGNC Symbol;Acc:667]                                  |
| ENS0000000145020 | 3_49228946_A_G_b37  | 3.47E-26 | 0.000169998 | rs11130183 | AMT           | aminomethyltransferase [Source:HGNC Symbol;Acc:473]                                       |
| ENS0000000145020 | 3_49269758_G_T_b37  | 3.26E-26 | 0.000169998 | rs2099526  | AMT           | aminomethyltransferase [Source:HGNC Symbol;Acc:473]                                       |
| ENS0000000145020 | 3_49412496_A_G_b37  | 5.30E-27 | 0.000169998 | rs6775069  | AMT           | aminomethyltransferase [Source:HGNC Symbol;Acc:473]                                       |
| ENS0000000145020 | 3_49484992_T_C_b37  | 2.57E-27 | 0.000169998 | rs11923032 | AMT           | aminomethyltransferase [Source:HGNC Symbol;Acc:473]                                       |
| ENS0000000145020 | 3_49496263_G_A_b37  | 3.38E-27 | 0.000169998 | rs2329025  | AMT           | aminomethyltransferase [Source:HGNC Symbol;Acc:473]                                       |
| ENS0000000145020 | 3_49518551_A_G_b37  | 8.84E-25 | 0.000169998 | rs7622786  | AMT           | aminomethyltransferase [Source:HGNC Symbol;Acc:473]                                       |
| ENS0000000145020 | 3_49529601_G_T_b37  | 3.45E-27 | 0.000169998 | rs4855858  | AMT           | aminomethyltransferase [Source:HGNC Symbol;Acc:473]                                       |
| ENS0000000145020 | 3_49598064_T_C_b37  | 2.37E-27 | 0.000169998 | rs9862534  | AMT           | aminomethyltransferase [Source:HGNC Symbol;Acc:473]                                       |
| ENS0000000145020 | 3_49642027_C_T_b37  | 6.67E-14 | 0.000169998 | rs4241405  | AMT           | aminomethyltransferase [Source:HGNC Symbol;Acc:473]                                       |
| ENS0000000235261 | 3_49228946_A_G_b37  | 1.54E-10 | 0.000169998 | rs11130183 | NICN1-AS1     | NICN1 antisense RNA 1 [Source:HGNC Symbol;Acc:40838]                                      |
| ENS0000000235261 | 3_49269758_G_T_b37  | 1.75E-10 | 0.000169998 | rs2099526  | NICN1-AS1     | NICN1 antisense RNA 1 [Source:HGNC Symbol;Acc:40838]                                      |
| ENS0000000235261 | 3_49412496_A_G_b37  | 6.34E-09 | 0.000169998 | rs6775069  | NICN1-AS1     | NICN1 antisense RNA 1 [Source:HGNC Symbol;Acc:40838]                                      |
| ENS0000000235261 | 3_49484992_T_C_b37  | 3.72E-09 | 0.000169998 | rs11923032 | NICN1-AS1     | NICN1 antisense RNA 1 [Source:HGNC Symbol;Acc:40838]                                      |
| ENS0000000235261 | 3_49496263_G_A_b37  | 4.57E-09 | 0.000169998 | rs2329025  | NICN1-AS1     | NICN1 antisense RNA 1 [Source:HGNC Symbol;Acc:40838]                                      |
| ENS0000000235261 | 3_49518551_A_G_b37  | 2.24E-08 | 0.000169998 | rs7622786  | NICN1-AS1     | NICN1 antisense RNA 1 [Source:HGNC Symbol;Acc:40838]                                      |
| ENS0000000235261 | 3_49529601_G_T_b37  | 4.60E-09 | 0.000169998 | rs4855858  | NICN1-AS1     | NICN1 antisense RNA 1 [Source:HGNC Symbol;Acc:40838]                                      |
| ENS0000000235261 | 3_49598064_T_C_b37  | 7.44E-09 | 0.000169998 | rs9862534  | NICN1-AS1     | NICN1 antisense RNA 1 [Source:HGNC Symbol;Acc:40838]                                      |
| ENS0000000235261 | 3_49642027_C_T_b37  | 1.29E-06 | 0.000169998 | rs4241405  | NICN1-AS1     | NICN1 antisense RNA 1 [Source:HGNC Symbol;Acc:40838]                                      |
| ENS0000000145029 | 3_49228946_A_G_b37  | 5.98E-11 | 0.000169998 | rs11130183 | NICN1         | nicotin 1 [Source:HGNC Symbol;Acc:18317]                                                  |
| ENS0000000145029 | 3_49269758_G_T_b37  | 1.22E-10 | 0.000169998 | rs2099526  | NICN1         | nicotin 1 [Source:HGNC Symbol;Acc:18317]                                                  |
| ENS0000000145029 | 3_49412496_A_G_b37  | 4.89E-09 | 0.000169998 | rs6775069  | NICN1         | nicotin 1 [Source:HGNC Symbol;Acc:18317]                                                  |
| ENS0000000145029 | 3_49484992_T_C_b37  | 1.93E-09 | 0.000169998 | rs11923032 | NICN1         | nicotin 1 [Source:HGNC Symbol;Acc:18317]                                                  |
| ENS0000000145029 | 3_49496263_G_A_b37  | 2.10E-09 | 0.000169998 | rs2329025  | NICN1         | nicotin 1 [Source:HGNC Symbol;Acc:18317]                                                  |
| ENS0000000145029 | 3_49518551_A_G_b37  | 2.53E-08 | 0.000169998 | rs7622786  | NICN1         | nicotin 1 [Source:HGNC Symbol;Acc:18317]                                                  |
| ENS0000000145029 | 3_49529601_G_T_b37  | 2.13E-09 | 0.000169998 | rs4855858  | NICN1         | nicotin 1 [Source:HGNC Symbol;Acc:18317]                                                  |
| ENS0000000145029 | 3_49598064_T_C_b37  | 1.69E-09 | 0.000169998 | rs9862534  | NICN1         | nicotin 1 [Source:HGNC Symbol;Acc:18317]                                                  |
| ENS0000000145029 | 3_49642027_C_T_b37  | 1.06E-05 | 0.000169998 | rs4241405  | NICN1         | nicotin 1 [Source:HGNC Symbol;Acc:18317]                                                  |
| ENS0000000185614 | 3_49228946_A_G_b37  | 1.55E-05 | 0.000169998 | rs11130183 | FAM212A       | family with sequence similarity 212, member A [Source:HGNC Symbol;Acc:32480]              |
| ENS0000000185614 | 3_49269758_G_T_b37  | 3.63E-05 | 0.000169998 | rs2099526  | FAM212A       | family with sequence similarity 212, member A [Source:HGNC Symbol;Acc:32480]              |
| ENS0000000185614 | 3_49412496_A_G_b37  | 8.34E-05 | 0.000169998 | rs6775069  | FAM212A       | family with sequence similarity 212, member A [Source:HGNC Symbol;Acc:32480]              |
| ENS0000000185614 | 3_49484992_T_C_b37  | 6.24E-05 | 0.000169998 | rs11923032 | FAM212A       | family with sequence similarity 212, member A [Source:HGNC Symbol;Acc:32480]              |
| ENS0000000185614 | 3_49496263_G_A_b37  | 5.78E-05 | 0.000169998 | rs2329025  | FAM212A       | family with sequence similarity 212, member A [Source:HGNC Symbol;Acc:32480]              |
| ENS0000000185614 | 3_49518551_A_G_b37  | 3.84E-05 | 0.000169998 | rs7622786  | FAM212A       | family with sequence similarity 212, member A [Source:HGNC Symbol;Acc:32480]              |
| ENS0000000185614 | 3_49529601_G_T_b37  | 5.78E-05 | 0.000169998 | rs4855858  | FAM212A       | family with sequence similarity 212, member A [Source:HGNC Symbol;Acc:32480]              |
| ENS0000000185614 | 3_49598064_T_C_b37  | 3.71E-05 | 0.000169998 | rs9862534  | FAM212A       | family with sequence similarity 212, member A [Source:HGNC Symbol;Acc:32480]              |
| ENS0000000185614 | 3_49642027_C_T_b37  | 1.99E-06 | 0.000169998 | rs4241405  | FAM212A       | family with sequence similarity 212, member A [Source:HGNC Symbol;Acc:32480]              |
| ENS000000004534  | 3_50047134_GT_G_b37 | 4.51E-10 | 0.000169998 | rs11294686 | RBM6          | RNA binding motif protein 6 [Source:HGNC Symbol;Acc:9903]                                 |
| ENS000000004534  | 3_50065274_G_A_b37  | 9.34E-10 | 0.000169998 | rs35375092 | RBM6          | RNA binding motif protein 6 [Source:HGNC Symbol;Acc:9903]                                 |
| ENS0000000186792 | 3_50352458_T_G_b37  | 2.81E-06 | 0.000169998 | rs9877046  | HALY3         | hyaluronoglucosaminidase 3 [Source:HGNC Symbol;Acc:5322]                                  |
| ENS0000000213672 | 3_49412015_C_T_b37  | 1.30E-05 | 0.000179998 | rs6769744  | NCKIPSD       | NCK interacting protein with SH3 domain [Source:HGNC Symbol;Acc:15486]                    |
| ENS0000000178252 | 3_49412015_C_T_b37  | 5.87E-09 | 0.000179998 | rs6769744  | WDR6          | WD repeat domain 6 [Source:HGNC Symbol;Acc:12758]                                         |
| ENS0000000178252 | 3_49624065_T_C_b37  | 3.28E-05 | 0.000179998 | rs9869120  | WDR6          | WD repeat domain 6 [Source:HGNC Symbol;Acc:12758]                                         |
| ENS0000000067560 | 3_49412015_C_T_b37  | 4.65E-09 | 0.000179998 | rs6769744  | RHOA          | ras homolog family member A [Source:HGNC Symbol;Acc:667]                                  |
| ENS0000000145020 | 3_49412015_C_T_b37  | 3.54E-27 | 0.000179998 | rs6769744  | AMT           | aminomethyltransferase [Source:HGNC Symbol;Acc:473]                                       |
| ENS0000000145020 | 3_49624065_T_C_b37  | 2.12E-14 | 0.000179998 | rs9869120  | AMT           | aminomethyltransferase [Source:HGNC Symbol;Acc:473]                                       |
| ENS0000000235261 | 3_49412015_C_T_b37  | 4.59E-09 | 0.000179998 | rs6769744  | NICN1-AS1     | NICN1 antisense RNA 1 [Source:HGNC Symbol;Acc:40838]                                      |
| ENS0000000235261 | 3_49624065_T_C_b37  | 4.55E-07 | 0.000179998 | rs9869120  | NICN1-AS1     | NICN1 antisense RNA 1 [Source:HGNC Symbol;Acc:40838]                                      |
| ENS0000000145029 | 3_49412015_C_T_b37  | 2.15E-09 | 0.000179998 | rs6769744  | NICN1         | nicotin 1 [Source:HGNC Symbol;Acc:18317]                                                  |
| ENS0000000145029 | 3_49624065_T_C_b37  | 3.       |             |            |               |                                                                                           |

|                 |                        |          |             |             |               |                                                                                                 |
|-----------------|------------------------|----------|-------------|-------------|---------------|-------------------------------------------------------------------------------------------------|
| ENS000000232112 | 3_49224210_A_G_b37     | 4.15E-05 | 0.000199998 | rs6446256   | TMA7          | translation machinery associated 7 homolog (S. cerevisiae) [Source:HGNC Symbol;Acc:26932]       |
| ENS000000232112 | 3_49307872_T_C_b37     | 6.55E-05 | 0.000199998 | rs11130187  | TMA7          | translation machinery associated 7 homolog (S. cerevisiae) [Source:HGNC Symbol;Acc:26932]       |
| ENS000000213672 | 3_49224210_A_G_b37     | 1.93E-05 | 0.000199998 | rs6446256   | NCKIPSD       | NCK interacting protein with SH3 domain [Source:HGNC Symbol;Acc:15486]                          |
| ENS000000213672 | 3_49307872_T_C_b37     | 8.29E-05 | 0.000199998 | rs11130187  | NCKIPSD       | NCK interacting protein with SH3 domain [Source:HGNC Symbol;Acc:15486]                          |
| ENS000000178252 | 3_49224210_A_G_b37     | 7.21E-10 | 0.000199998 | rs6446256   | WDRE          | WD repeat domain 6 [Source:HGNC Symbol;Acc:12758]                                               |
| ENS000000178252 | 3_49307872_T_C_b37     | 1.92E-09 | 0.000199998 | rs11130187  | WDRE          | WD repeat domain 6 [Source:HGNC Symbol;Acc:12758]                                               |
| ENS000000067560 | 3_49224210_A_G_b37     | 3.76E-08 | 0.000199998 | rs6446256   | RHOA          | ras homolog family member A [Source:HGNC Symbol;Acc:667]                                        |
| ENS000000067560 | 3_49307872_T_C_b37     | 5.86E-08 | 0.000199998 | rs11130187  | RHOA          | ras homolog family member A [Source:HGNC Symbol;Acc:667]                                        |
| ENS000000145020 | 3_49224210_A_G_b37     | 2.90E-26 | 0.000199998 | rs6446256   | AMT           | aminomethyltransferase [Source:HGNC Symbol;Acc:473]                                             |
| ENS000000145020 | 3_49307872_T_C_b37     | 2.75E-25 | 0.000199998 | rs11130187  | AMT           | aminomethyltransferase [Source:HGNC Symbol;Acc:473]                                             |
| ENS000000235261 | 3_49224210_A_G_b37     | 1.66E-10 | 0.000199998 | rs6446256   | NICN1-AS1     | NICN1 antisense RNA 1 [Source:HGNC Symbol;Acc:40838]                                            |
| ENS000000235261 | 3_49307872_T_C_b37     | 1.31E-10 | 0.000199998 | rs11130187  | NICN1-AS1     | NICN1 antisense RNA 1 [Source:HGNC Symbol;Acc:40838]                                            |
| ENS000000145029 | 3_49224210_A_G_b37     | 7.92E-11 | 0.000199998 | rs6446256   | NICN1         | nicotin 1 [Source:HGNC Symbol;Acc:18317]                                                        |
| ENS000000145029 | 3_49307872_T_C_b37     | 5.51E-11 | 0.000199998 | rs11130187  | NICN1         | nicotin 1 [Source:HGNC Symbol;Acc:18317]                                                        |
| ENS000000185614 | 3_49224210_A_G_b37     | 1.33E-05 | 0.000199998 | rs6446256   | FAM212A       | family with sequence similarity 212, member A [Source:HGNC Symbol;Acc:32480]                    |
| ENS000000185614 | 3_49307872_T_C_b37     | 3.09E-05 | 0.000199998 | rs11130187  | FAM212A       | family with sequence similarity 212, member A [Source:HGNC Symbol;Acc:32480]                    |
| ENS000000004534 | 3_49976144_TC_T_b37    | 6.09E-10 | 0.000199998 | rs200537286 | RBM6          | RNA binding motif protein 6 [Source:HGNC Symbol;Acc:9903]                                       |
| ENS000000147894 | 9_27586162_A_G_b37     | 4.63E-07 | 0.000199998 | rs2453556   | C9orf72       | chromosome 9 open reading frame 72 [Source:HGNC Symbol;Acc:28337]                               |
| ENS000000232112 | 3_49216472_T_C_b37     | 2.44E-05 | 0.000209998 | rs9834003   | TMA7          | translation machinery associated 7 homolog (S. cerevisiae) [Source:HGNC Symbol;Acc:26932]       |
| ENS000000213672 | 3_49216472_T_C_b37     | 1.48E-05 | 0.000209998 | rs9834003   | NCKIPSD       | NCK interacting protein with SH3 domain [Source:HGNC Symbol;Acc:15486]                          |
| ENS000000178252 | 3_49216472_T_C_b37     | 8.37E-10 | 0.000209998 | rs9834003   | WDRE          | WD repeat domain 6 [Source:HGNC Symbol;Acc:12758]                                               |
| ENS000000067560 | 3_49216472_T_C_b37     | 4.72E-08 | 0.000209998 | rs9834003   | RHOA          | ras homolog family member A [Source:HGNC Symbol;Acc:667]                                        |
| ENS000000145020 | 3_49216472_T_C_b37     | 2.97E-26 | 0.000209998 | rs9834003   | AMT           | aminomethyltransferase [Source:HGNC Symbol;Acc:473]                                             |
| ENS000000145020 | 3_49628155_CATA_C_b37  | 4.42E-13 | 0.000209998 | rs74693643  | AMT           | aminomethyltransferase [Source:HGNC Symbol;Acc:473]                                             |
| ENS000000235261 | 3_49216472_T_C_b37     | 2.07E-10 | 0.000209998 | rs9834003   | NICN1-AS1     | NICN1 antisense RNA 1 [Source:HGNC Symbol;Acc:40838]                                            |
| ENS000000235261 | 3_49628155_CATA_C_b37  | 1.67E-05 | 0.000209998 | rs74693643  | NICN1-AS1     | NICN1 antisense RNA 1 [Source:HGNC Symbol;Acc:40838]                                            |
| ENS000000145029 | 3_49216472_T_C_b37     | 1.36E-10 | 0.000209998 | rs9834003   | NICN1         | nicotin 1 [Source:HGNC Symbol;Acc:18317]                                                        |
| ENS000000145029 | 3_49628155_CATA_C_b37  | 6.10E-05 | 0.000209998 | rs74693643  | NICN1         | nicotin 1 [Source:HGNC Symbol;Acc:18317]                                                        |
| ENS000000185614 | 3_49216472_T_C_b37     | 1.11E-05 | 0.000209998 | rs9834003   | FAM212A       | family with sequence similarity 212, member A [Source:HGNC Symbol;Acc:32480]                    |
| ENS000000185614 | 3_49628155_CATA_C_b37  | 3.14E-06 | 0.000209998 | rs74693643  | FAM212A       | family with sequence similarity 212, member A [Source:HGNC Symbol;Acc:32480]                    |
| ENS000000004534 | 3_49987475_C_T_b37     | 6.09E-10 | 0.000209998 | rs7615318   | RBM6          | RNA binding motif protein 6 [Source:HGNC Symbol;Acc:9903]                                       |
| ENS000000004534 | 3_50088943_A_G_b37     | 1.80E-14 | 0.000209998 | rs6446197   | RBM6          | RNA binding motif protein 6 [Source:HGNC Symbol;Acc:9903]                                       |
| ENS000000204644 | 6_30436560_A_G_b37     | 5.00E-08 | 0.000209998 | rs115256213 | ZFP57         | ZFP57 zinc finger protein [Source:HGNC Symbol;Acc:18791]                                        |
| ENS000000204632 | 6_30436560_A_G_b37     | 7.17E-08 | 0.000209998 | rs115256213 | HLA-G         | major histocompatibility complex, class I, G [Source:HGNC Symbol;Acc:4964]                      |
| ENS000000230795 | 6_30436560_A_G_b37     | 4.02E-06 | 0.000209998 | rs115256213 | HLA-K         | major histocompatibility complex, class I, K (pseudogene) [Source:HGNC Symbol;Acc:4969]         |
| ENS000000204625 | 6_30436560_A_G_b37     | 1.43E-07 | 0.000209998 | rs115256213 | HCG9          | HLA complex group 9 (non-protein coding) [Source:HGNC Symbol;Acc:21243]                         |
| ENS000000232112 | 3_49220448_G_A_b37     | 3.19E-05 | 0.000219998 | rs4955423   | TMA7          | translation machinery associated 7 homolog (S. cerevisiae) [Source:HGNC Symbol;Acc:26932]       |
| ENS000000213672 | 3_49220448_G_A_b37     | 1.69E-05 | 0.000219998 | rs4955423   | NCKIPSD       | NCK interacting protein with SH3 domain [Source:HGNC Symbol;Acc:15486]                          |
| ENS000000213672 | 3_49449638_G_A_b37     | 1.13E-05 | 0.000219998 | rs940045    | NCKIPSD       | NCK interacting protein with SH3 domain [Source:HGNC Symbol;Acc:15486]                          |
| ENS000000178252 | 3_49220448_G_A_b37     | 7.65E-10 | 0.000219998 | rs4955423   | WDRE          | WD repeat domain 6 [Source:HGNC Symbol;Acc:12758]                                               |
| ENS000000178252 | 3_49449638_G_A_b37     | 6.94E-09 | 0.000219998 | rs940045    | WDRE          | WD repeat domain 6 [Source:HGNC Symbol;Acc:12758]                                               |
| ENS000000067560 | 3_49220448_G_A_b37     | 4.15E-08 | 0.000219998 | rs4955423   | RHOA          | ras homolog family member A [Source:HGNC Symbol;Acc:667]                                        |
| ENS000000067560 | 3_49449638_G_A_b37     | 3.96E-09 | 0.000219998 | rs940045    | RHOA          | ras homolog family member A [Source:HGNC Symbol;Acc:667]                                        |
| ENS000000145020 | 3_49220448_G_A_b37     | 2.80E-26 | 0.000219998 | rs4955423   | AMT           | aminomethyltransferase [Source:HGNC Symbol;Acc:473]                                             |
| ENS000000145020 | 3_49449638_G_A_b37     | 4.67E-27 | 0.000219998 | rs940045    | AMT           | aminomethyltransferase [Source:HGNC Symbol;Acc:473]                                             |
| ENS000000235261 | 3_49220448_G_A_b37     | 1.82E-10 | 0.000219998 | rs4955423   | NICN1-AS1     | NICN1 antisense RNA 1 [Source:HGNC Symbol;Acc:40838]                                            |
| ENS000000235261 | 3_49449638_G_A_b37     | 8.84E-09 | 0.000219998 | rs940045    | NICN1-AS1     | NICN1 antisense RNA 1 [Source:HGNC Symbol;Acc:40838]                                            |
| ENS000000145029 | 3_49220448_G_A_b37     | 1.01E-10 | 0.000219998 | rs4955423   | NICN1         | nicotin 1 [Source:HGNC Symbol;Acc:18317]                                                        |
| ENS000000145029 | 3_49449638_G_A_b37     | 3.02E-09 | 0.000219998 | rs940045    | NICN1         | nicotin 1 [Source:HGNC Symbol;Acc:18317]                                                        |
| ENS000000185614 | 3_49220448_G_A_b37     | 1.21E-05 | 0.000219998 | rs4955423   | FAM212A       | family with sequence similarity 212, member A [Source:HGNC Symbol;Acc:32480]                    |
| ENS000000185614 | 3_49449638_G_A_b37     | 6.55E-05 | 0.000219998 | rs940045    | FAM212A       | family with sequence similarity 212, member A [Source:HGNC Symbol;Acc:32480]                    |
| ENS000000004534 | 3_49997193_C_T_b37     | 6.51E-10 | 0.000219998 | rs13083396  | RBM6          | RNA binding motif protein 6 [Source:HGNC Symbol;Acc:9903]                                       |
| ENS000000227354 | 13_80207603_A_C_b37    | 4.16E-18 | 0.000219998 | rs58739959  | RBM26-AS1     | RBM26 antisense RNA 1 [Source:HGNC Symbol;Acc:39805]                                            |
| ENS000000227354 | 13_80216147_A_G_b37    | 1.78E-19 | 0.000219998 | rs6563127   | RBM26-AS1     | RBM26 antisense RNA 1 [Source:HGNC Symbol;Acc:39805]                                            |
| ENS000000004534 | 3_49899795_G_A_b37     | 3.13E-15 | 0.000229998 | rs3796386   | RBM6          | RNA binding motif protein 6 [Source:HGNC Symbol;Acc:9903]                                       |
| ENS000000004534 | 3_50120257_A_G_b37     | 6.33E-10 | 0.000229998 | rs55924524  | RBM6          | RNA binding motif protein 6 [Source:HGNC Symbol;Acc:9903]                                       |
| ENS000000004534 | 3_50126215_C_A_b37     | 1.38E-14 | 0.000229998 | rs2247510   | RBM6          | RNA binding motif protein 6 [Source:HGNC Symbol;Acc:9903]                                       |
| ENS000000004534 | 3_50136463_G_A_b37     | 6.01E-10 | 0.000229998 | rs13095697  | RBM6          | RNA binding motif protein 6 [Source:HGNC Symbol;Acc:9903]                                       |
| ENS000000186792 | 3_50357869_A_C_b37     | 1.25E-06 | 0.000229998 | rs709210    | HYAL3         | hyaluronoglucosaminidase 3 [Source:HGNC Symbol;Acc:5322]                                        |
| ENS000000260787 | 15_7312826_T_C_b37     | 7.58E-06 | 0.000229998 | rs16968627  | RP11-797A18.4 |                                                                                                 |
| ENS000000213672 | 3_49533094_C_G_b37     | 1.04E-05 | 0.000239998 | rs7374731   | NCKIPSD       | NCK interacting protein with SH3 domain [Source:HGNC Symbol;Acc:15486]                          |
| ENS000000178252 | 3_49533094_C_G_b37     | 4.04E-09 | 0.000239998 | rs7374731   | WDRE          | WD repeat domain 6 [Source:HGNC Symbol;Acc:12758]                                               |
| ENS000000067560 | 3_49533094_C_G_b37     | 5.83E-09 | 0.000239998 | rs7374731   | RHOA          | ras homolog family member A [Source:HGNC Symbol;Acc:667]                                        |
| ENS000000145020 | 3_49533094_C_G_b37     | 2.07E-27 | 0.000239998 | rs7374731   | AMT           | aminomethyltransferase [Source:HGNC Symbol;Acc:473]                                             |
| ENS000000235261 | 3_49533094_C_G_b37     | 7.96E-09 | 0.000239998 | rs7374731   | NICN1-AS1     | NICN1 antisense RNA 1 [Source:HGNC Symbol;Acc:40838]                                            |
| ENS000000145029 | 3_49533094_C_G_b37     | 2.03E-09 | 0.000239998 | rs7374731   | NICN1         | nicotin 1 [Source:HGNC Symbol;Acc:18317]                                                        |
| ENS000000185614 | 3_49533094_C_G_b37     | 3.19E-05 | 0.000239998 | rs7374731   | FAM212A       | family with sequence similarity 212, member A [Source:HGNC Symbol;Acc:32480]                    |
| ENS000000166669 | 16_10494325_T_G_b37    | 6.10E-05 | 0.000239998 | rs12925855  | ATF7IP2       | activating transcription factor 7 interacting protein 2 [Source:HGNC Symbol;Acc:20397]          |
| ENS000000223745 | 1_93810436_T_A_b37     | 1.85E-31 | 0.000249998 | rs3067470   | RP4-17123.3   |                                                                                                 |
| ENS000000145020 | 3_49724808_T_C_b37     | 3.48E-09 | 0.000259997 | rs3020779   | AMT           | aminomethyltransferase [Source:HGNC Symbol;Acc:473]                                             |
| ENS000000235261 | 3_49724808_T_C_b37     | 3.05E-05 | 0.000259997 | rs3020779   | NICN1-AS1     | NICN1 antisense RNA 1 [Source:HGNC Symbol;Acc:40838]                                            |
| ENS000000145029 | 3_49724808_T_C_b37     | 4.97E-05 | 0.000259997 | rs3020779   | NICN1         | nicotin 1 [Source:HGNC Symbol;Acc:18317]                                                        |
| ENS000000185614 | 3_49724808_T_C_b37     | 2.90E-06 | 0.000259997 | rs3020779   | FAM212A       | family with sequence similarity 212, member A [Source:HGNC Symbol;Acc:32480]                    |
| ENS000000004534 | 3_49902160_T_C_b37     | 3.13E-15 | 0.000279997 | rs2883059   | RBM6          | RNA binding motif protein 6 [Source:HGNC Symbol;Acc:9903]                                       |
| ENS000000164078 | 3_50067350_T_C_b37     | 7.46E-05 | 0.000289997 | rs35849525  | MTSR1         | macrophage stimulating 1 receptor (c-met-related tyrosine kinase) [Source:HGNC Symbol;Acc:7381] |
| ENS000000004534 | 3_49991060_C_T_b37     | 5.83E-10 | 0.000289997 | rs71326904  | RBM6          | RNA binding motif protein 6 [Source:HGNC Symbol;Acc:9903]                                       |
| ENS000000004534 | 3_50067350_T_C_b37     | 1.25E-10 | 0.000289997 | rs35849525  | RBM6          | RNA binding motif protein 6 [Source:HGNC Symbol;Acc:9903]                                       |
| ENS000000204147 | 10_52488890_G_T_b37    | 5.85E-07 | 0.000289997 | rs12780210  | ASAH2B        | N-acylsphingosine amidohydrolase (non-lysosomal ceramidase) 2B [Source:HGNC Symbol;Acc:23456]   |
| ENS000000178252 | 3_49708574_TGTC_T_b37  | 3.29E-05 | 0.000309997 | rs200763649 | WDRE          | WD repeat domain 6 [Source:HGNC Symbol;Acc:12758]                                               |
| ENS000000145020 | 3_49708574_TGTC_T_b37  | 2.24E-08 | 0.000309997 | rs200763649 | AMT           | aminomethyltransferase [Source:HGNC Symbol;Acc:473]                                             |
| ENS000000145020 | 3_49887278_T_C_b37     | 1.43E-05 | 0.000309997 | rs55901550  | AMT           | aminomethyltransferase [Source:HGNC Symbol;Acc:473]                                             |
| ENS000000185614 | 3_49708574_TGTC_T_b37  | 7.35E-05 | 0.000309997 | rs200763649 | FAM212A       | family with sequence similarity 212, member A [Source:HGNC Symbol;Acc:32480]                    |
| ENS000000185614 | 3_49887278_T_C_b37     | 1.92E-05 | 0.000309997 | rs55901550  | FAM212A       | family with sequence similarity 212, member A [Source:HGNC Symbol;Acc:32480]                    |
| ENS000000143067 | 1_120148215_GC_G_b37   | 9.95E-05 | 0.000309997 | rs587638658 | ZNF697        | zinc finger protein 697 [Source:HGNC Symbol;Acc:32034]                                          |
| ENS000000227354 | 13_80204753_C_A_b37    | 1.78E-19 | 0.000309997 | rs6563125   | RBM26-AS1     | RBM26 antisense RNA 1 [Source:HGNC Symbol;Acc:39805]                                            |
| ENS000000004534 | 3_50085153_A_G_b37     | 1.05E-10 | 0.000329997 | rs17304079  | RBM6          | RNA binding motif protein 6 [Source:HGNC Symbol;Acc:9903]                                       |
| ENS000000213672 | 3_49488984_T_C_b37     | 4.55E-05 | 0.000339997 | rs4855869   | NCKIPSD       | NCK interacting protein with SH3 domain [Source:HGNC Symbol;Acc:15486]                          |
| ENS000000178252 | 3_49488984_T_C_b37     | 3.10E-08 | 0.000339997 | rs4855869   | WDRE          | WD repeat domain 6 [Source:HGNC Symbol;Acc:12758]                                               |
| ENS000000067560 | 3_49488984_T_C_b37     | 1.30E-08 | 0.000339997 | rs4855869   | RHOA          | ras homolog family member A [Source:HGNC Symbol;Acc:667]                                        |
| ENS000000145020 | 3_49488984_T_C_b37     | 1.17E-25 | 0.000339997 | rs4855869   | AMT           | aminomethyltransferase [Source:HGNC Symbol;Acc:473]                                             |
| ENS000000235261 | 3_49488984_T_C_b37     | 1.78E-08 | 0.000339997 | rs4855869   | NICN1-AS1     | NICN1 antisense RNA 1 [Source:HGNC Symbol;Acc:40838]                                            |
| ENS000000145029 | 3_49488984_T_C_b37     | 5.10E-09 | 0.000339997 | rs4855869   | NICN1         | nicotin 1 [Source:HGNC Symbol;Acc:18317]                                                        |
| ENS000000004534 | 3_50165101_T_C_b37     | 2.16E-14 | 0.000339997 | rs2624848   | RBM6          | RNA binding motif protein 6 [Source:HGNC Symbol;Acc:9903]                                       |
| ENS000000004534 | 3_49908023_G_A_b37     | 3.20E-15 | 0.000349997 | rs952594    | RBM6          | RNA binding motif protein 6 [Source:HGNC Symbol;Acc:9903]                                       |
| ENS000000225213 | 10_16748793_G_C_b37    | 8.14E-05 | 0.000349997 | rs4523590   | RP11-197M22.2 |                                                                                                 |
| ENS000000213672 | 3_49328833_A_C_b37     | 4.99E-05 | 0.000359996 | rs9811047   | NCKIPSD       | NCK interacting protein with SH3 domain [Source:HGNC Symbol;Acc:15486]                          |
| ENS000000178252 | 3_49328833_A_C_b37     | 3.44E-07 | 0.000359996 | rs9811047   | WDRE          | WD repeat domain 6 [Source:HGNC Symbol;Acc:12758]                                               |
| ENS000000067560 | 3_49328833_A_C_b37     | 1.76E-08 | 0.000359996 | rs9811047   | RHOA          | ras homolog family member A [Source:HGNC Symbol;Acc:667]                                        |
| ENS000000145020 | 3_49328833_A_C_b37     | 5.54E-25 | 0.000359996 | rs9811047   | AMT           | aminomethyltransferase [Source:HGNC Symbol;Acc:473]                                             |
| ENS000000235261 | 3_49328833_A_C_b37     | 2.18E-11 | 0.000359996 | rs9811047   | NICN1-AS1     | NICN1 antisense RNA 1 [Source:HGNC Symbol;Acc:40838]                                            |
| ENS000000145029 | 3_49328833_A_C_b37     | 3.13E-11 | 0.000359996 | rs9811047   | NICN1         | nicotin 1 [Source:HGNC Symbol;Acc:18317]                                                        |
| ENS000000004534 | 3_50108948_G_GAGTC_b37 | 1.00E-10 | 0.000359996 | rs55914752  | RBM6          | RNA binding motif protein 6 [Source:HGNC Symbol;Acc:9903]                                       |
| ENS000000213672 | 3_49408816_G_C_b37     | 1.31E-05 | 0.000369996 | rs6796147   | NCKIPSD       | NCK interacting protein with SH3 domain [                                                       |

|                 |                        |          |             |             |               |                                                                                              |
|-----------------|------------------------|----------|-------------|-------------|---------------|----------------------------------------------------------------------------------------------|
| ENSG00000004534 | 3_50135412_A_C_b37     | 9.43E-11 | 0.000389996 | rs7648652   | RBM6          | RNA binding motif protein 6 [Source:HGNC Symbol;Acc:9903]                                    |
| ENSG00000240045 | 3_155005811_A_G_b37    | 1.12E-05 | 0.000399996 | rs62279098  | RP11-451G4.2  |                                                                                              |
| ENSG00000102606 | 13_111968025_T_A_b37   | 1.04E-05 | 0.000409996 | rs9515403   | ARHGEF7       | Rho guanine nucleotide exchange factor (GEF) 7 [Source:HGNC Symbol;Acc:15607]                |
| ENSG00000004534 | 3_49993453_G_GA_b37    | 5.81E-10 | 0.000419996 | rs199936500 | RBM6          | RNA binding motif protein 6 [Source:HGNC Symbol;Acc:9903]                                    |
| ENSG00000232112 | 3_48412260_AC_A_b37    | 4.28E-07 | 0.000429996 | rs200936725 | TMA7          | translation machinery associated 7 homolog (S. cerevisiae) [Source:HGNC Symbol;Acc:26932]    |
| ENSG00000244380 | 3_48412260_AC_A_b37    | 1.18E-05 | 0.000429996 | rs200936725 | RP11-24C3.2   |                                                                                              |
| ENSG00000213672 | 3_48412260_AC_A_b37    | 3.27E-05 | 0.000429996 | rs200936725 | NCKIPSD       | NCK interacting protein with SH3 domain [Source:HGNC Symbol;Acc:15486]                       |
| ENSG00000229980 | 17_48984310_G_A_b37    | 4.04E-05 | 0.000439996 | rs11079939  | TOB1-AS1      | TOB1 antisense RNA 1 [Source:HGNC Symbol;Acc:44340]                                          |
| ENSG00000240399 | 12_48403837_GC_G_b37   | 6.03E-05 | 0.000449996 | rs68168422  | RP1-228P16.1  |                                                                                              |
| ENSG00000004534 | 3_50078221_T_C_b37     | 2.30E-15 | 0.000459995 | rs7430334   | RBM6          | RNA binding motif protein 6 [Source:HGNC Symbol;Acc:9903]                                    |
| ENSG00000215790 | 1_1667323_C_T_b37      | 9.43E-05 | 0.000459995 | rs78368772  | SLC35E2       | solute carrier family 35, member E2 [Source:HGNC Symbol;Acc:20863]                           |
| ENSG00000169885 | 1_1667323_C_T_b37      | 4.26E-11 | 0.000459995 | rs78368772  | CALML6        | calmodulin-like 6 [Source:HGNC Symbol;Acc:24193]                                             |
| ENSG00000178821 | 1_1667323_C_T_b37      | 2.57E-07 | 0.000459995 | rs78368772  | TMEM52        | transmembrane protein 52 [Source:HGNC Symbol;Acc:27916]                                      |
| ENSG00000178462 | 10_5492027_TGTCA_T_b37 | 4.30E-08 | 0.000459995 | rs66980083  | TUBAL3        | tubulin, alpha-like 3 [Source:HGNC Symbol;Acc:23534]                                         |
| ENSG00000225213 | 10_16763882_A_G_b37    | 4.10E-06 | 0.000469995 | rs10732931  | RP11-197M22.2 |                                                                                              |
| ENSG00000159461 | 16_57107653_A_G_b37    | 2.16E-05 | 0.000469995 | rs7201800   | AMFR          | autocrine motility factor receptor, E3 ubiquitin protein ligase [Source:HGNC Symbol;Acc:463] |
| ENSG00000213672 | 3_49378797_A_T_b37     | 2.02E-05 | 0.000499995 | rs9834535   | NCKIPSD       | NCK interacting protein with SH3 domain [Source:HGNC Symbol;Acc:15486]                       |
| ENSG00000178252 | 3_49378797_A_T_b37     | 6.70E-09 | 0.000499995 | rs9834535   | WDR6          | WD repeat domain 6 [Source:HGNC Symbol;Acc:12758]                                            |
| ENSG00000067560 | 3_49378797_A_T_b37     | 3.74E-08 | 0.000499995 | rs9834535   | RHOA          | ras homolog family member A [Source:HGNC Symbol;Acc:667]                                     |
| ENSG00000145020 | 3_49378797_A_T_b37     | 5.14E-26 | 0.000499995 | rs9834535   | AMT           | aminomethyltransferase [Source:HGNC Symbol;Acc:473]                                          |
| ENSG00000235261 | 3_49378797_A_T_b37     | 1.83E-10 | 0.000499995 | rs9834535   | NICN1-AS1     | NICN1 antisense RNA 1 [Source:HGNC Symbol;Acc:40838]                                         |
| ENSG00000145029 | 3_49378797_A_T_b37     | 1.62E-10 | 0.000499995 | rs9834535   | NICN1         | nicotin 1 [Source:HGNC Symbol;Acc:18317]                                                     |
| ENSG00000185614 | 3_49378797_A_T_b37     | 2.91E-05 | 0.000499995 | rs9834535   | FAM212A       | family with sequence similarity 212, member A [Source:HGNC Symbol;Acc:32480]                 |
| ENSG00000004534 | 3_50043341_A_T_b37     | 1.30E-14 | 0.000499995 | rs12634780  | RBM6          | RNA binding motif protein 6 [Source:HGNC Symbol;Acc:9903]                                    |
| ENSG00000159461 | 16_57109161_C_T_b37    | 2.14E-05 | 0.000499995 | rs113689453 | AMFR          | autocrine motility factor receptor, E3 ubiquitin protein ligase [Source:HGNC Symbol;Acc:463] |
