# Supplementary material for: Meta-Analysis of Polymyositis and Dermatomyositis Microarray Data Reveals Novel Genetic Biomarkers
Source: MDPI journal article supplement (doi:10.3390/genes10110864), 2019-10-30
Supplement: s1 [file s1]

**Supplementary Table 1.** Total list of 600 DEGs and their statistics

| Entrez_ID | zSco_Ex_1 | FDR_Ex_1 | zSco_Ex_2 | FDR_Ex_2 | zSco_Ex_3 | FDR_Ex_3 | zSco  | FDR  | MUvals | MUsds | Qvals | df | Qpvalues | Chisq |   |
|-----------|-----------|----------|-----------|----------|-----------|----------|-------|------|--------|-------|-------|----|----------|-------|---|
| 10010     | 1.16      | 0.32     | 2.47      | 0.03     | 1.83      | 0.23     | 3.14  | 0.01 | 1.18   | 0.38  | 0.92  |    | 2        | 0.63  | 0 |
| 1E+08     | -1.29     | 0.27     | -2.69     | 0.02     | -2.25     | 0.14     | -3.61 | 0    | -1.38  | 0.38  | 0.96  |    | 2        | 0.62  | 0 |
| 10019     | 1.16      | 0.32     | 3.22      | 0.01     | 2.53      | 0.1      | 3.42  | 0    | 1.58   | 0.46  | 2.59  |    | 2        | 0.27  | 0 |
| 10026     | 0.97      | 0.44     | 1.45      | 0.2      | 3.17      | 0.05     | 3.42  | 0    | 1.26   | 0.37  | 1.43  |    | 2        | 0.49  | 0 |
| 1003      | 2.59      | 0.11     | 2.35      | 0.04     | 3.38      | 0.04     | 4.78  | 0    | 1.92   | 0.4   | 0.78  |    | 2        | 0.68  | 0 |
| 10045     | -1.24     | 0.29     | -2.45     | 0.03     | -2.65     | 0.09     | -3.76 | 0    | -1.42  | 0.38  | 0.46  |    | 2        | 0.8   | 0 |
| 10089     | -1.68     | 0.18     | -2.99     | 0.01     | -1.86     | 0.22     | -3.55 | 0    | -1.43  | 0.4   | 2.08  |    | 2        | 0.35  | 0 |
| 10135     | 1.36      | 0.25     | 2.31      | 0.04     | 1.94      | 0.2      | 3.24  | 0.01 | 1.21   | 0.37  | 0.46  |    | 2        | 0.8   | 0 |
| 10161     | 1.85      | 0.16     | 2.53      | 0.03     | 2.56      | 0.1      | 4.02  | 0    | 1.55   | 0.39  | 0.25  |    | 2        | 0.88  | 0 |
| 10184     | 2.4       | 0.12     | 2.3       | 0.04     | 2.77      | 0.08     | 4.26  | 0    | 1.67   | 0.39  | 0.63  |    | 2        | 0.73  | 0 |
| 10186     | 2.04      | 0.14     | 3.28      | 0.01     | 2.44      | 0.11     | 4.14  | 0    | 1.78   | 0.43  | 2.17  |    | 2        | 0.34  | 0 |
| 10211     | 0.99      | 0.42     | 1.51      | 0.18     | 2.94      | 0.06     | 3.31  | 0.01 | 1.22   | 0.37  | 0.94  |    | 2        | 0.63  | 0 |
| 10269     | 1.46      | 0.22     | 3.08      | 0.01     | 2.16      | 0.16     | 3.75  | 0    | 1.48   | 0.39  | 2.03  |    | 2        | 0.36  | 0 |
| 10278     | -1.25     | 0.29     | -2.09     | 0.06     | -2.62     | 0.09     | -3.55 | 0    | -1.33  | 0.37  | 0.19  |    | 2        | 0.91  | 0 |
| 10279     | -1.88     | 0.15     | -3.01     | 0.01     | -2.66     | 0.09     | -4.32 | 0    | -1.72  | 0.4   | 0.98  |    | 2        | 0.61  | 0 |
| 10346     | 1.98      | 0.14     | 3.88      | 0        | 3.02      | 0.06     | 3.26  | 0.01 | 2.33   | 0.72  | 4.56  |    | 2        | 0.1   | 0 |
| 10393     | 0.73      | 0.63     | 2.91      | 0.01     | 3.42      | 0.04     | 3.52  | 0    | 1.63   | 0.46  | 2.71  |    | 2        | 0.26  | 0 |
| 10403     | 1.36      | 0.25     | 1.31      | 0.25     | 2.96      | 0.06     | 3.38  | 0    | 1.24   | 0.37  | 0.91  |    | 2        | 0.63  | 0 |
| 10420     | -2.21     | 0.13     | -2.72     | 0.02     | -2.82     | 0.07     | -4.45 | 0    | -1.77  | 0.4   | 0.44  |    | 2        | 0.8   | 0 |
| 10434     | 0.82      | 0.56     | 2.55      | 0.03     | 1.98      | 0.2      | 3.12  | 0.01 | 1.17   | 0.38  | 1.36  |    | 2        | 0.51  | 0 |
| 10497     | -1.29     | 0.27     | -1.3      | 0.25     | -2.91     | 0.07     | -3.31 | 0.01 | -1.22  | 0.37  | 0.89  |    | 2        | 0.64  | 0 |
| 10512     | 1.32      | 0.26     | 1.63      | 0.15     | 3.31      | 0.04     | 3.78  | 0    | 1.41   | 0.37  | 1.03  |    | 2        | 0.6   | 0 |
| 10561     | 1.48      | 0.22     | 1.93      | 0.09     | 3.42      | 0.04     | 4.11  | 0    | 1.55   | 0.38  | 0.68  |    | 2        | 0.71  | 0 |
| 10652     | 1.8       | 0.16     | 2.26      | 0.05     | 2.05      | 0.18     | 3.48  | 0    | 1.32   | 0.38  | 0.39  |    | 2        | 0.82  | 0 |
| 10671     | 0.84      | 0.54     | 2.73      | 0.02     | 2.07      | 0.17     | 3.27  | 0.01 | 1.24   | 0.38  | 1.74  |    | 2        | 0.42  | 0 |
| 1072      | 2.13      | 0.14     | 2.8       | 0.02     | 1.74      | 0.26     | 3.57  | 0    | 1.45   | 0.41  | 2.1   |    | 2        | 0.35  | 0 |
| 10791     | 2.38      | 0.12     | 2.92      | 0.01     | 2.81      | 0.07     | 4.6   | 0    | 1.86   | 0.4   | 0.91  |    | 2        | 0.63  | 0 |
| 10797     | 1.78      | 0.16     | 2.26      | 0.05     | 2.41      | 0.11     | 3.74  | 0    | 1.42   | 0.38  | 0.12  |    | 2        | 0.94  | 0 |
| 10848     | -1.32     | 0.26     | -2.73     | 0.02     | -1.97     | 0.2      | -3.44 | 0    | -1.31  | 0.38  | 1.29  |    | 2        | 0.53  | 0 |
| 10964     | 1.37      | 0.24     | 2.65      | 0.02     | 3.72      | 0.03     | 4.66  | 0    | 1.82   | 0.39  | 0.96  |    | 2        | 0.62  | 0 |
| 10990     | 2.25      | 0.13     | 2.26      | 0.05     | 1.88      | 0.22     | 3.53  | 0    | 1.36   | 0.38  | 1.24  |    | 2        | 0.54  | 0 |
| 1101      | -1.72     | 0.17     | -1.8      | 0.11     | -2.49     | 0.1      | -3.51 | 0    | -1.31  | 0.37  | 0.08  |    | 2        | 0.96  | 0 |
| 11010     | 2.41      | 0.12     | 1.83      | 0.1      | 1.73      | 0.26     | 3.22  | 0.01 | 1.23   | 0.38  | 1.75  |    | 2        | 0.42  | 0 |
| 11021     | 2.56      | 0.12     | 1.42      | 0.2      | 2.13      | 0.16     | 3.14  | 0.01 | 1.27   | 0.4   | 2.19  |    | 2        | 0.33  | 0 |
| 11067     | 1.61      | 0.19     | 2.3       | 0.04     | 2.17      | 0.15     | 3.51  | 0    | 1.33   | 0.38  | 0.26  |    | 2        | 0.88  | 0 |
| 11076     | -2.05     | 0.14     | -2.89     | 0.01     | -2.81     | 0.07     | -4.46 | 0    | -1.78  | 0.4   | 0.57  |    | 2        | 0.75  | 0 |
| 11083     | -1.55     | 0.2      | -2.84     | 0.02     | -3.52     | 0.03     | -4.71 | 0    | -1.86  | 0.4   | 0.63  |    | 2        | 0.73  | 0 |
| 11096     | 1.03      | 0.4      | 1.45      | 0.2      | 3.01      | 0.06     | 3.35  | 0.01 | 1.23   | 0.37  | 1.06  |    | 2        | 0.59  | 0 |
| 11119     | 2.28      | 0.12     | 1.44      | 0.2      | 1.95      | 0.2      | 3.11  | 0.01 | 1.17   | 0.38  | 1.38  |    | 2        | 0.5   | 0 |
| 11189     | -1.62     | 0.19     | -2.65     | 0.02     | -1.51     | 0.34     | -3.21 | 0.01 | -1.22  | 0.38  | 1.66  |    | 2        | 0.44  | 0 |
| 11190     | -1.05     | 0.39     | -3.07     | 0.01     | -3.19     | 0.05     | -4.2  | 0    | -1.69  | 0.4   | 2.09  |    | 2        | 0.35  | 0 |
| 112464    | 0.74      | 0.62     | 2.13      | 0.06     | 2.71      | 0.08     | 3.38  | 0    | 1.26   | 0.37  | 0.99  |    | 2        | 0.61  | 0 |
| 11319     | 0.95      | 0.46     | 2.75      | 0.02     | 1.82      | 0.23     | 3.15  | 0.01 | 1.19   | 0.38  | 1.83  |    | 2        | 0.4   | 0 |
| 11326     | 2.9       | 0.1      | 2.69      | 0.02     | 2.53      | 0.1      | 3.73  | 0    | 1.9    | 0.51  | 2.74  |    | 2        | 0.25  | 0 |
| 11340     | 0.65      | 0.69     | 2.63      | 0.02     | 2.65      | 0.09     | 3.55  | 0    | 1.34   | 0.38  | 1.83  |    | 2        | 0.4   | 0 |
| 11341     | -0.91     | 0.49     | -2.54     | 0.03     | -1.92     | 0.21     | -3.12 | 0.01 | -1.17  | 0.38  | 1.26  |    | 2        | 0.53  | 0 |
| 114625    | -0.79     | 0.58     | -2.68     | 0.02     | -3.45     | 0.04     | -4    | 0    | -1.61  | 0.4   | 2.15  |    | 2        | 0.34  | 0 |
| 114818    | -1.61     | 0.19     | -1.77     | 0.11     | -2.85     | 0.07     | -3.69 | 0    | -1.38  | 0.37  | 0.21  |    | 2        | 0.9   | 0 |
| 114908    | 2.02      | 0.14     | 2.48      | 0.03     | 2.98      | 0.06     | 4.37  | 0    | 1.71   | 0.39  | 0.05  |    | 2        | 0.97  | 0 |
| 1230      | 2.58      | 0.11     | 1.27      | 0.26     | 3.09      | 0.05     | 3.28  | 0.01 | 1.52   | 0.47  | 2.72  |    | 2        | 0.26  | 0 |
| 1266      | 2.22      | 0.13     | 1.87      | 0.1      | 3.57      | 0.03     | 4.5   | 0    | 1.75   | 0.39  | 0.93  |    | 2        | 0.63  | 0 |
| 1267      | 1.09      | 0.36     | 2.71      | 0.02     | 2.09      | 0.17     | 3.4   | 0    | 1.29   | 0.38  | 1.33  |    | 2        | 0.51  | 0 |
| 1272      | -0.69     | 0.66     | -2.77     | 0.02     | -2.2      | 0.15     | -3.23 | 0.01 | -1.25  | 0.39  | 2.08  |    | 2        | 0.35  | 0 |
| 1282      | 1.62      | 0.19     | 2.64      | 0.02     | 2.71      | 0.08     | 4.08  | 0    | 1.58   | 0.39  | 0.34  |    | 2        | 0.84  | 0 |
| 1284      | 1.13      | 0.34     | 2.31      | 0.04     | 3         | 0.06     | 3.87  | 0    | 1.46   | 0.38  | 0.62  |    | 2        | 0.73  | 0 |
| 1293      | 2.55      | 0.12     | 2.5       | 0.03     | 2.44      | 0.11     | 4.16  | 0    | 1.65   | 0.4   | 1.38  |    | 2        | 0.5   | 0 |
| 1306      | 1.92      | 0.15     | 2.02      | 0.07     | 3.2       | 0.05     | 4.22  | 0    | 1.62   | 0.38  | 0.22  |    | 2        | 0.89  | 0 |
| 131408    | -1.57     | 0.2      | -1.67     | 0.14     | -2.25     | 0.14     | -3.2  | 0.01 | -1.19  | 0.37  | 0.05  |    | 2        | 0.97  | 0 |
| 1381      | -0.82     | 0.56     | -2.22     | 0.05     | -3.01     | 0.06     | -3.68 | 0    | -1.38  | 0.37  | 1.18  |    | 2        | 0.56  | 0 |
| 140578    | -1.1      | 0.35     | -2.28     | 0.04     | -1.96     | 0.2      | -3.12 | 0.01 | -1.16  | 0.37  | 0.54  |    | 2        | 0.76  | 0 |
| 1428      | -1.53     | 0.21     | -1.27     | 0.26     | -3.02     | 0.06     | -3.47 | 0    | -1.28  | 0.37  | 1.03  |    | 2        | 0.6   | 0 |
| 145389    | 2.2       | 0.13     | 1.63      | 0.14     | 2.31      | 0.13     | 3.47  | 0    | 1.31   | 0.38  | 0.84  |    | 2        | 0.66  | 0 |
| 1462      | 2.52      | 0.12     | 1.39      | 0.22     | 2.44      | 0.11     | 3.46  | 0    | 1.33   | 0.38  | 2.03  |    | 2        | 0.36  | 0 |
| 1471      | 2.03      | 0.14     | 3.01      | 0.01     | 1.69      | 0.28     | 3.19  | 0.01 | 1.53   | 0.48  | 2.7   |    | 2        | 0.26  | 0 |
| 1490      | 1.18      | 0.31     | 2.74      | 0.02     | 2.59      | 0.09     | 3.82  | 0    | 1.47   | 0.38  | 1.04  |    | 2        | 0.6   | 0 |
| 1499      | 1.34      | 0.25     | 2.78      | 0.02     | 1.82      | 0.23     | 3.36  | 0.01 | 1.29   | 0.38  | 1.56  |    | 2        | 0.46  | 0 |
| 1519      | 2.33      | 0.12     | 2.37      | 0.04     | 1.61      | 0.3      | 3.41  | 0    | 1.32   | 0.39  | 2     |    | 2        | 0.37  | 0 |
| 1536      | 2.87      | 0.1      | 1.8       | 0.11     | 3.18      | 0.05     | 3.65  | 0    | 1.77   | 0.49  | 2.72  |    | 2        | 0.26  | 0 |
| 1571      | -1.11     | 0.35     | -3.11     | 0.01     | -2.9      | 0.07     | -4.06 | 0    | -1.63  | 0.4   | 2.08  |    | 2        | 0.35  | 0 |

|        |       |      |       |      |       |      |       |      |       |      |      |   |      |   |
|--------|-------|------|-------|------|-------|------|-------|------|-------|------|------|---|------|---|
| 1601   | 2.12  | 0.14 | 2.74  | 0.02 | 2.15  | 0.16 | 3.92  | 0    | 1.54  | 0.39 | 1.22 | 2 | 0.54 | 0 |
| 1634   | 1.57  | 0.2  | 2.34  | 0.04 | 1.85  | 0.23 | 3.28  | 0.01 | 1.24  | 0.38 | 0.58 | 2 | 0.75 | 0 |
| 1644   | -1.96 | 0.15 | -1.42 | 0.21 | -2.14 | 0.16 | -3.14 | 0.01 | -1.16 | 0.37 | 0.61 | 2 | 0.74 | 0 |
| 1804   | -1.59 | 0.19 | -3.25 | 0.01 | -4.17 | 0.02 | -5.38 | 0    | -2.22 | 0.41 | 1.53 | 2 | 0.47 | 0 |
| 1806   | 1.82  | 0.16 | 1.55  | 0.17 | 2.35  | 0.12 | 3.31  | 0.01 | 1.23  | 0.37 | 0.31 | 2 | 0.86 | 0 |
| 1896   | -1.02 | 0.41 | -2.94 | 0.01 | -2.59 | 0.09 | -3.82 | 0    | -1.48 | 0.39 | 1.81 | 2 | 0.4  | 0 |
| 1901   | 1.77  | 0.17 | 1.02  | 0.37 | 3.41  | 0.04 | 3.35  | 0.01 | 1.36  | 0.41 | 2.33 | 2 | 0.31 | 0 |
| 1952   | -2.58 | 0.11 | -3.18 | 0.01 | -2.75 | 0.08 | -4.73 | 0    | -1.97 | 0.42 | 1.93 | 2 | 0.38 | 0 |
| 1954   | -1.67 | 0.18 | -1.22 | 0.28 | -3.54 | 0.03 | -3.8  | 0    | -1.44 | 0.38 | 2.04 | 2 | 0.36 | 0 |
| 196    | 2.04  | 0.14 | 3.1   | 0.01 | 2.02  | 0.18 | 3.68  | 0    | 1.61  | 0.44 | 2.3  | 2 | 0.32 | 0 |
| 199    | 1.73  | 0.17 | 1.9   | 0.09 | 1.99  | 0.19 | 3.22  | 0.01 | 1.2   | 0.37 | 0.19 | 2 | 0.91 | 0 |
| 2      | 1.92  | 0.15 | 3.4   | 0.01 | 3.54  | 0.03 | 5.15  | 0    | 2.14  | 0.41 | 1.25 | 2 | 0.54 | 0 |
| 2004   | 2.43  | 0.12 | 3.02  | 0.01 | 2.69  | 0.08 | 4.57  | 0    | 1.86  | 0.41 | 1.35 | 2 | 0.51 | 0 |
| 200424 | -1.03 | 0.4  | -2.77 | 0.02 | -2.57 | 0.1  | -3.74 | 0    | -1.43 | 0.38 | 1.35 | 2 | 0.51 | 0 |
| 201134 | 1.71  | 0.17 | 1.48  | 0.19 | 3.49  | 0.03 | 3.99  | 0    | 1.5   | 0.38 | 1.38 | 2 | 0.5  | 0 |
| 202018 | -1.07 | 0.38 | -2.03 | 0.07 | -3.56 | 0.03 | -4.06 | 0    | -1.53 | 0.38 | 1.43 | 2 | 0.49 | 0 |
| 2037   | 1.76  | 0.17 | 2.42  | 0.03 | 1.98  | 0.2  | 3.5   | 0    | 1.33  | 0.38 | 0.62 | 2 | 0.73 | 0 |
| 2040   | 1.96  | 0.15 | 2.63  | 0.02 | 2.16  | 0.16 | 3.82  | 0    | 1.48  | 0.39 | 0.85 | 2 | 0.66 | 0 |
| 2047   | -1.62 | 0.19 | -2.94 | 0.01 | -2.38 | 0.12 | -3.97 | 0    | -1.55 | 0.39 | 1.2  | 2 | 0.55 | 0 |
| 2049   | -1.32 | 0.26 | -3.09 | 0.01 | -3.09 | 0.05 | -4.39 | 0    | -1.74 | 0.4  | 1.53 | 2 | 0.46 | 0 |
| 205    | -1.94 | 0.15 | -2.62 | 0.02 | -2.67 | 0.09 | -4.18 | 0    | -1.63 | 0.39 | 0.3  | 2 | 0.86 | 0 |
| 2050   | -1.2  | 0.31 | -1.95 | 0.08 | -2.43 | 0.11 | -3.31 | 0.01 | -1.23 | 0.37 | 0.14 | 2 | 0.93 | 0 |
| 2059   | 1.6   | 0.19 | 1.88  | 0.09 | 2.62  | 0.09 | 3.6   | 0    | 1.35  | 0.37 | 0.04 | 2 | 0.98 | 0 |
| 2079   | 1.12  | 0.34 | 2.68  | 0.02 | 2.23  | 0.14 | 3.5   | 0    | 1.33  | 0.38 | 1.13 | 2 | 0.57 | 0 |
| 2150   | -2.12 | 0.14 | -2.8  | 0.02 | -1.83 | 0.23 | -3.71 | 0    | -1.46 | 0.39 | 1.91 | 2 | 0.39 | 0 |
| 2176   | -1.06 | 0.38 | -2.92 | 0.01 | -2.84 | 0.07 | -4.02 | 0    | -1.56 | 0.39 | 1.63 | 2 | 0.44 | 0 |
| 218    | -1.17 | 0.32 | -1.09 | 0.34 | -3.15 | 0.05 | -3.28 | 0.01 | -1.2  | 0.37 | 1.72 | 2 | 0.42 | 0 |
| 2189   | -0.88 | 0.51 | -1.66 | 0.14 | -2.63 | 0.09 | -3.13 | 0.01 | -1.15 | 0.37 | 0.59 | 2 | 0.74 | 0 |
| 2196   | -1.64 | 0.18 | -3.32 | 0.01 | -2.06 | 0.18 | -3.16 | 0.01 | -1.64 | 0.52 | 3.05 | 2 | 0.22 | 0 |
| 2202   | 2.16  | 0.13 | 2.69  | 0.02 | 1.73  | 0.26 | 3.61  | 0    | 1.41  | 0.39 | 1.92 | 2 | 0.38 | 0 |
| 2207   | 2.86  | 0.1  | 2.82  | 0.02 | 2.17  | 0.15 | 3.26  | 0.01 | 1.9   | 0.58 | 3.44 | 2 | 0.18 | 0 |
| 2261   | -1.74 | 0.17 | -2.83 | 0.02 | -2.02 | 0.18 | -3.71 | 0    | -1.44 | 0.39 | 1.35 | 2 | 0.51 | 0 |
| 22862  | 1.62  | 0.19 | 3.11  | 0.01 | 1.84  | 0.23 | 3.23  | 0.01 | 1.48  | 0.46 | 2.54 | 2 | 0.28 | 0 |
| 22877  | -2.9  | 0.1  | -2.56 | 0.02 | -3.23 | 0.05 | -4.86 | 0    | -2    | 0.41 | 1.76 | 2 | 0.41 | 0 |
| 2288   | -1.49 | 0.21 | -1.75 | 0.12 | -2.36 | 0.12 | -3.28 | 0.01 | -1.22 | 0.37 | 0.02 | 2 | 0.99 | 0 |
| 22893  | -1.02 | 0.4  | -2.57 | 0.02 | -2.2  | 0.15 | -3.39 | 0    | -1.28 | 0.38 | 1.02 | 2 | 0.6  | 0 |
| 22916  | 1.69  | 0.18 | 1.56  | 0.16 | 2.87  | 0.07 | 3.62  | 0    | 1.35  | 0.37 | 0.45 | 2 | 0.8  | 0 |
| 22918  | 2.35  | 0.12 | 2.27  | 0.04 | 2.1   | 0.17 | 3.73  | 0    | 1.45  | 0.39 | 1.18 | 2 | 0.55 | 0 |
| 22919  | 1.34  | 0.25 | 2.55  | 0.03 | 2.52  | 0.1  | 3.76  | 0    | 1.43  | 0.38 | 0.51 | 2 | 0.78 | 0 |
| 22938  | 0.9   | 0.49 | 2.64  | 0.02 | 2.02  | 0.19 | 3.23  | 0.01 | 1.22  | 0.38 | 1.43 | 2 | 0.49 | 0 |
| 2299   | -1.71 | 0.17 | -2.56 | 0.02 | -1.57 | 0.32 | -3.25 | 0.01 | -1.24 | 0.38 | 1.4  | 2 | 0.5  | 0 |
| 23071  | 2.18  | 0.13 | 2.13  | 0.06 | 1.46  | 0.36 | 3.13  | 0.01 | 1.19  | 0.38 | 1.63 | 2 | 0.44 | 0 |
| 23086  | -1.13 | 0.34 | -2.97 | 0.01 | -1.88 | 0.22 | -3.15 | 0.01 | -1.32 | 0.42 | 2.29 | 2 | 0.32 | 0 |
| 23108  | -0.88 | 0.51 | -1.95 | 0.08 | -2.38 | 0.12 | -3.13 | 0.01 | -1.15 | 0.37 | 0.45 | 2 | 0.8  | 0 |
| 23129  | 2     | 0.14 | 3.74  | 0    | 2.6   | 0.09 | 3.18  | 0.01 | 2.13  | 0.67 | 4.26 | 2 | 0.12 | 0 |
| 23166  | 2.32  | 0.12 | 2.47  | 0.03 | 2.04  | 0.18 | 3.78  | 0    | 1.47  | 0.39 | 1.33 | 2 | 0.51 | 0 |
| 23179  | 2.67  | 0.11 | 2.86  | 0.01 | 2.14  | 0.16 | 3.57  | 0    | 1.78  | 0.5  | 2.73 | 2 | 0.26 | 0 |
| 23180  | 2.12  | 0.14 | 2.61  | 0.02 | 2.15  | 0.16 | 3.86  | 0    | 1.51  | 0.39 | 1    | 2 | 0.61 | 0 |
| 23239  | -1.56 | 0.2  | -1.69 | 0.13 | -2.35 | 0.12 | -3.28 | 0.01 | -1.22 | 0.37 | 0.05 | 2 | 0.97 | 0 |
| 23242  | -1.8  | 0.16 | -1.7  | 0.13 | -2.4  | 0.12 | -3.42 | 0    | -1.28 | 0.37 | 0.18 | 2 | 0.91 | 0 |
| 23258  | 2.07  | 0.14 | 3.08  | 0.01 | 2.19  | 0.15 | 4.08  | 0    | 1.63  | 0.4  | 1.93 | 2 | 0.38 | 0 |
| 23263  | -1    | 0.42 | -2.77 | 0.02 | -2.88 | 0.07 | -3.95 | 0    | -1.52 | 0.38 | 1.4  | 2 | 0.5  | 0 |
| 23286  | -1.33 | 0.26 | -3.4  | 0.01 | -3.99 | 0.02 | -4.35 | 0    | -2.11 | 0.49 | 2.64 | 2 | 0.27 | 0 |
| 2332   | 2.07  | 0.14 | 2.22  | 0.05 | 1.65  | 0.29 | 3.28  | 0.01 | 1.25  | 0.38 | 1.17 | 2 | 0.56 | 0 |
| 23325  | 1.32  | 0.26 | 1.85  | 0.1  | 2.41  | 0.11 | 3.31  | 0.01 | 1.22  | 0.37 | 0.05 | 2 | 0.98 | 0 |
| 2335   | 1.84  | 0.16 | 2.11  | 0.06 | 1.89  | 0.22 | 3.31  | 0.01 | 1.25  | 0.38 | 0.47 | 2 | 0.79 | 0 |
| 23381  | -1.84 | 0.16 | -1.57 | 0.16 | -2.4  | 0.12 | -3.36 | 0.01 | -1.25 | 0.37 | 0.31 | 2 | 0.85 | 0 |
| 23452  | 2.19  | 0.13 | 1.9   | 0.09 | 2.26  | 0.14 | 3.58  | 0    | 1.36  | 0.38 | 0.66 | 2 | 0.72 | 0 |
| 23471  | 1.7   | 0.17 | 2.77  | 0.02 | 1.61  | 0.3  | 3.37  | 0    | 1.3   | 0.39 | 1.85 | 2 | 0.4  | 0 |
| 23510  | -1.84 | 0.16 | -2.81 | 0.02 | -1.89 | 0.22 | -3.65 | 0    | -1.42 | 0.39 | 1.54 | 2 | 0.46 | 0 |
| 23516  | 1.89  | 0.15 | 2.14  | 0.06 | 1.62  | 0.3  | 3.15  | 0.01 | 1.19  | 0.38 | 0.85 | 2 | 0.65 | 0 |
| 23545  | -0.63 | 0.7  | -2.75 | 0.02 | -2.82 | 0.07 | -3.5  | 0    | -1.41 | 0.4  | 2.19 | 2 | 0.33 | 0 |
| 23586  | 1.4   | 0.24 | 1.92  | 0.09 | 2.49  | 0.1  | 3.44  | 0    | 1.28  | 0.37 | 0.03 | 2 | 0.98 | 0 |
| 23601  | -1.21 | 0.3  | -2.5  | 0.03 | -2.52 | 0.1  | -3.67 | 0    | -1.39 | 0.38 | 0.57 | 2 | 0.75 | 0 |
| 23643  | 3.32  | 0.11 | 3.15  | 0.01 | 3.23  | 0.05 | 3.36  | 0    | 2.7   | 0.8  | 4.79 | 2 | 0.09 | 0 |
| 23760  | 2.2   | 0.13 | 3.11  | 0.01 | 1.77  | 0.25 | 3.15  | 0.01 | 1.66  | 0.53 | 3.09 | 2 | 0.21 | 0 |
| 24138  | 1.93  | 0.15 | 2.83  | 0.02 | 3.33  | 0.04 | 4.76  | 0    | 1.9   | 0.4  | 0.16 | 2 | 0.92 | 0 |
| 246    | -1.21 | 0.3  | -3.23 | 0.01 | -2.46 | 0.11 | -3.4  | 0    | -1.57 | 0.46 | 2.6  | 2 | 0.27 | 0 |
| 2537   | 1.47  | 0.22 | 2.06  | 0.07 | 4.02  | 0.02 | 4.59  | 0    | 1.76  | 0.38 | 1.57 | 2 | 0.46 | 0 |
| 25758  | -1.49 | 0.21 | -2.63 | 0.02 | -3.12 | 0.05 | -4.3  | 0    | -1.67 | 0.39 | 0.4  | 2 | 0.82 | 0 |
| 25778  | -1.73 | 0.17 | -1.32 | 0.24 | -4.04 | 0.02 | -3.37 | 0    | -1.58 | 0.47 | 2.95 | 2 | 0.23 | 0 |

|        |       |      |       |      |       |      |       |      |       |      |      |   |      |   |
|--------|-------|------|-------|------|-------|------|-------|------|-------|------|------|---|------|---|
| 25801  | 1.94  | 0.15 | 1.74  | 0.12 | 2.61  | 0.09 | 3.65  | 0    | 1.37  | 0.38 | 0.29 | 2 | 0.86 | 0 |
| 25833  | -1.25 | 0.28 | -3.35 | 0.01 | -2.75 | 0.08 | -3.5  | 0    | -1.71 | 0.49 | 2.79 | 2 | 0.25 | 0 |
| 259173 | -1.95 | 0.15 | -3.11 | 0.01 | -3.06 | 0.06 | -4.69 | 0    | -1.89 | 0.4  | 0.78 | 2 | 0.68 | 0 |
| 25936  | 1.3   | 0.27 | 3.46  | 0.01 | 3.09  | 0.05 | 3.6   | 0    | 1.86  | 0.52 | 2.99 | 2 | 0.22 | 0 |
| 25937  | 2.15  | 0.13 | 2.56  | 0.02 | 2.25  | 0.14 | 3.92  | 0    | 1.53  | 0.39 | 0.84 | 2 | 0.66 | 0 |
| 25939  | 2.14  | 0.13 | 2.34  | 0.04 | 3     | 0.06 | 4.35  | 0    | 1.7   | 0.39 | 0.12 | 2 | 0.94 | 0 |
| 25970  | -1.8  | 0.16 | -2.86 | 0.01 | -3.82 | 0.02 | -5.06 | 0    | -2.03 | 0.4  | 0.36 | 2 | 0.83 | 0 |
| 26001  | -0.44 | 0.83 | -2.26 | 0.04 | -2.67 | 0.09 | -3.27 | 0.01 | -1.22 | 0.37 | 1.72 | 2 | 0.42 | 0 |
| 26013  | -1.07 | 0.37 | -3.3  | 0.01 | -3.39 | 0.04 | -3.71 | 0    | -1.82 | 0.49 | 2.83 | 2 | 0.24 | 0 |
| 26015  | -2.03 | 0.14 | -2.55 | 0.03 | -2.78 | 0.08 | -4.27 | 0    | -1.67 | 0.39 | 0.19 | 2 | 0.91 | 0 |
| 26017  | 1.93  | 0.15 | 2.41  | 0.03 | 2.04  | 0.18 | 3.61  | 0    | 1.38  | 0.38 | 0.67 | 2 | 0.72 | 0 |
| 26048  | -1.22 | 0.3  | -3.28 | 0.01 | -4.32 | 0.02 | -4.17 | 0    | -2.13 | 0.51 | 2.96 | 2 | 0.23 | 0 |
| 26088  | -0.99 | 0.43 | -3.01 | 0.01 | -4.21 | 0.02 | -3.8  | 0    | -1.93 | 0.51 | 3.1  | 2 | 0.21 | 0 |
| 26205  | -1.52 | 0.21 | -2.05 | 0.07 | -2.35 | 0.12 | -3.47 | 0    | -1.3  | 0.37 | 0.02 | 2 | 0.99 | 0 |
| 26330  | -1.39 | 0.24 | -2.95 | 0.01 | -2.63 | 0.09 | -4.04 | 0    | -1.58 | 0.39 | 1.21 | 2 | 0.54 | 0 |
| 2643   | 1.69  | 0.18 | 2.65  | 0.02 | 1.61  | 0.3  | 3.31  | 0.01 | 1.27  | 0.38 | 1.54 | 2 | 0.46 | 0 |
| 26520  | 0.78  | 0.59 | 2.42  | 0.03 | 2.32  | 0.13 | 3.28  | 0.01 | 1.23  | 0.37 | 1.1  | 2 | 0.58 | 0 |
| 26750  | 1.4   | 0.24 | 2.51  | 0.03 | 1.94  | 0.2  | 3.36  | 0.01 | 1.27  | 0.38 | 0.78 | 2 | 0.68 | 0 |
| 2694   | -1.45 | 0.22 | -2.96 | 0.01 | -2.63 | 0.09 | -4.08 | 0    | -1.59 | 0.39 | 1.17 | 2 | 0.56 | 0 |
| 2697   | 1.45  | 0.22 | 3.04  | 0.01 | 2.1   | 0.17 | 3.72  | 0    | 1.45  | 0.39 | 1.96 | 2 | 0.38 | 0 |
| 27005  | -2.75 | 0.11 | -1.69 | 0.13 | -3.02 | 0.06 | -3.77 | 0    | -1.65 | 0.44 | 2.36 | 2 | 0.31 | 0 |
| 27165  | -1.45 | 0.22 | -1.93 | 0.08 | -2.88 | 0.07 | -3.73 | 0    | -1.4  | 0.37 | 0.18 | 2 | 0.92 | 0 |
| 27232  | -2    | 0.14 | -2.49 | 0.03 | -1.64 | 0.29 | -3.38 | 0    | -1.3  | 0.38 | 1.44 | 2 | 0.49 | 0 |
| 27242  | 2.16  | 0.13 | 1.7   | 0.13 | 2.51  | 0.1  | 3.64  | 0    | 1.38  | 0.38 | 0.65 | 2 | 0.72 | 0 |
| 27292  | 0.86  | 0.52 | 1.88  | 0.09 | 2.78  | 0.08 | 3.36  | 0.01 | 1.24  | 0.37 | 0.75 | 2 | 0.69 | 0 |
| 2774   | -2.2  | 0.13 | -2.45 | 0.03 | -3.61 | 0.03 | -4.88 | 0    | -1.94 | 0.4  | 0.12 | 2 | 0.94 | 0 |
| 2780   | -2.1  | 0.14 | -2.32 | 0.04 | -2.08 | 0.17 | -3.66 | 0    | -1.4  | 0.38 | 0.75 | 2 | 0.69 | 0 |
| 2799   | 2.19  | 0.13 | 2.41  | 0.03 | 2.68  | 0.09 | 4.18  | 0    | 1.63  | 0.39 | 0.34 | 2 | 0.85 | 0 |
| 283459 | -1.03 | 0.4  | -1.57 | 0.16 | -2.92 | 0.07 | -3.35 | 0.01 | -1.23 | 0.37 | 0.8  | 2 | 0.67 | 0 |
| 283638 | -1.22 | 0.3  | -3.21 | 0.01 | -2.51 | 0.1  | -3.56 | 0    | -1.58 | 0.44 | 2.42 | 2 | 0.3  | 0 |
| 28965  | -2.2  | 0.13 | -2.2  | 0.05 | -2.2  | 0.15 | -3.71 | 0    | -1.43 | 0.38 | 0.71 | 2 | 0.7  | 0 |
| 28977  | 0.94  | 0.46 | 2.15  | 0.06 | 2.93  | 0.06 | 3.64  | 0    | 1.36  | 0.37 | 0.81 | 2 | 0.67 | 0 |
| 2899   | -1.6  | 0.19 | -2.89 | 0.01 | -1.55 | 0.32 | -3.12 | 0.01 | -1.31 | 0.42 | 2.29 | 2 | 0.32 | 0 |
| 2903   | -1.79 | 0.16 | -3.02 | 0.01 | -2.14 | 0.16 | -3.9  | 0    | -1.54 | 0.39 | 1.73 | 2 | 0.42 | 0 |
| 29080  | 1.15  | 0.33 | 2.77  | 0.02 | 3.22  | 0.05 | 4.26  | 0    | 1.65  | 0.39 | 1.18 | 2 | 0.55 | 0 |
| 29091  | -1.77 | 0.16 | -2.28 | 0.04 | -2.14 | 0.16 | -3.55 | 0    | -1.35 | 0.38 | 0.31 | 2 | 0.85 | 0 |
| 2959   | 1     | 0.42 | 2.78  | 0.02 | 2.33  | 0.13 | 3.56  | 0    | 1.36  | 0.38 | 1.51 | 2 | 0.47 | 0 |
| 2974   | -1.41 | 0.23 | -2.58 | 0.02 | -1.75 | 0.26 | -3.25 | 0.01 | -1.23 | 0.38 | 1.13 | 2 | 0.57 | 0 |
| 29880  | 1.87  | 0.16 | 2.75  | 0.02 | 2.25  | 0.14 | 3.9   | 0    | 1.52  | 0.39 | 0.9  | 2 | 0.64 | 0 |
| 29887  | 2.55  | 0.12 | 1.88  | 0.09 | 2.55  | 0.1  | 3.88  | 0    | 1.5   | 0.39 | 1.46 | 2 | 0.48 | 0 |
| 2990   | 2.19  | 0.13 | 2.99  | 0.01 | 2.62  | 0.09 | 4.42  | 0    | 1.78  | 0.4  | 1.09 | 2 | 0.58 | 0 |
| 29915  | 0.9   | 0.49 | 2.36  | 0.04 | 2.28  | 0.13 | 3.28  | 0.01 | 1.23  | 0.37 | 0.8  | 2 | 0.67 | 0 |
| 29957  | 2.71  | 0.11 | 2.96  | 0.01 | 2.97  | 0.06 | 4.84  | 0    | 2     | 0.41 | 1.45 | 2 | 0.48 | 0 |
| 3001   | 1.93  | 0.15 | 2.44  | 0.03 | 1.78  | 0.24 | 3.44  | 0    | 1.32  | 0.38 | 1.05 | 2 | 0.59 | 0 |
| 3002   | 0.87  | 0.52 | 2.21  | 0.05 | 2.17  | 0.15 | 3.12  | 0.01 | 1.16  | 0.37 | 0.64 | 2 | 0.73 | 0 |
| 301    | 1.74  | 0.17 | 3.02  | 0.01 | 1.91  | 0.21 | 3.62  | 0    | 1.46  | 0.4  | 2.09 | 2 | 0.35 | 0 |
| 3010   | -2.58 | 0.11 | -2.73 | 0.02 | -2.15 | 0.16 | -3.89 | 0    | -1.66 | 0.43 | 2.18 | 2 | 0.34 | 0 |
| 3059   | 1.85  | 0.16 | 1.95  | 0.08 | 1.91  | 0.21 | 3.24  | 0.01 | 1.22  | 0.37 | 0.38 | 2 | 0.83 | 0 |
| 308    | 1.84  | 0.16 | 3     | 0.01 | 2.45  | 0.11 | 4.14  | 0    | 1.64  | 0.4  | 1.22 | 2 | 0.54 | 0 |
| 30844  | 1.49  | 0.21 | 3.32  | 0.01 | 2.99  | 0.06 | 4.46  | 0    | 1.81  | 0.4  | 2.02 | 2 | 0.36 | 0 |
| 3091   | 2.23  | 0.13 | 2.26  | 0.04 | 1.52  | 0.33 | 3.26  | 0.01 | 1.25  | 0.38 | 1.77 | 2 | 0.41 | 0 |
| 3133   | 2.11  | 0.14 | 3.5   | 0.01 | 2.86  | 0.07 | 4.32  | 0    | 2.02  | 0.47 | 2.37 | 2 | 0.31 | 0 |
| 3169   | -1.29 | 0.27 | -2.07 | 0.07 | -2.06 | 0.18 | -3.17 | 0.01 | -1.18 | 0.37 | 0.15 | 2 | 0.93 | 0 |
| 3200   | -2.16 | 0.13 | -2.01 | 0.07 | -1.72 | 0.26 | -3.25 | 0.01 | -1.23 | 0.38 | 1.13 | 2 | 0.57 | 0 |
| 3294   | -1.81 | 0.16 | -2.46 | 0.03 | -1.74 | 0.26 | -3.37 | 0    | -1.28 | 0.38 | 1.01 | 2 | 0.6  | 0 |
| 3352   | -1.72 | 0.17 | -2.39 | 0.03 | -2.96 | 0.06 | -4.18 | 0    | -1.61 | 0.38 | 0.03 | 2 | 0.98 | 0 |
| 3371   | 2.56  | 0.11 | 1.63  | 0.15 | 2.28  | 0.14 | 3.54  | 0    | 1.35  | 0.38 | 1.9  | 2 | 0.39 | 0 |
| 3383   | 2.35  | 0.12 | 2.32  | 0.04 | 2.39  | 0.12 | 3.97  | 0    | 1.55  | 0.39 | 0.85 | 2 | 0.65 | 0 |
| 3384   | 2.52  | 0.12 | 1.53  | 0.17 | 2.94  | 0.06 | 3.93  | 0    | 1.51  | 0.38 | 1.85 | 2 | 0.4  | 0 |
| 3420   | -1.93 | 0.15 | -1.54 | 0.17 | -2.4  | 0.12 | -3.38 | 0    | -1.26 | 0.37 | 0.46 | 2 | 0.8  | 0 |
| 3429   | 1.34  | 0.25 | 3.28  | 0.01 | 3.24  | 0.05 | 4.46  | 0    | 1.84  | 0.41 | 2.08 | 2 | 0.35 | 0 |
| 3431   | 2.25  | 0.13 | 3.61  | 0.01 | 2.77  | 0.08 | 3.79  | 0    | 2.16  | 0.57 | 3.13 | 2 | 0.21 | 0 |
| 3434   | 1.06  | 0.38 | 3.29  | 0.01 | 3.41  | 0.04 | 3.72  | 0    | 1.82  | 0.49 | 2.82 | 2 | 0.24 | 0 |
| 3437   | 1.46  | 0.22 | 2.39  | 0.03 | 3.36  | 0.04 | 4.33  | 0    | 1.66  | 0.38 | 0.41 | 2 | 0.82 | 0 |
| 3459   | 1.54  | 0.2  | 2.72  | 0.02 | 1.92  | 0.21 | 3.5   | 0    | 1.34  | 0.38 | 1.22 | 2 | 0.54 | 0 |
| 3479   | 2.64  | 0.11 | 3.19  | 0.01 | 3.15  | 0.05 | 5.07  | 0    | 2.13  | 0.42 | 1.36 | 2 | 0.51 | 0 |
| 3483   | -1.43 | 0.23 | -2.71 | 0.02 | -1.7  | 0.27 | -3.29 | 0.01 | -1.25 | 0.38 | 1.51 | 2 | 0.47 | 0 |
| 3487   | 2.57  | 0.11 | 2.72  | 0.02 | 2.21  | 0.15 | 4.09  | 0    | 1.65  | 0.4  | 2.02 | 2 | 0.36 | 0 |
| 3490   | 1.59  | 0.19 | 3.29  | 0.01 | 2.69  | 0.08 | 4.27  | 0    | 1.73  | 0.4  | 2.03 | 2 | 0.36 | 0 |
| 3491   | 1.11  | 0.35 | 2.68  | 0.02 | 2.71  | 0.08 | 3.84  | 0    | 1.47  | 0.38 | 1    | 2 | 0.61 | 0 |
| 357    | -1.13 | 0.34 | -2.56 | 0.02 | -1.76 | 0.25 | -3.12 | 0.01 | -1.18 | 0.38 | 1.21 | 2 | 0.55 | 0 |

|        |       |      |       |      |       |      |       |      |       |      |      |   |      |   |
|--------|-------|------|-------|------|-------|------|-------|------|-------|------|------|---|------|---|
| 3587   | 2.46  | 0.12 | 2.25  | 0.05 | 1.73  | 0.26 | 3.44  | 0    | 1.35  | 0.39 | 2.04 | 2 | 0.36 | 0 |
| 3613   | -2.2  | 0.13 | -1.15 | 0.31 | -2.77 | 0.08 | -3.49 | 0    | -1.31 | 0.38 | 1.67 | 2 | 0.43 | 0 |
| 3617   | -2.12 | 0.14 | -1.86 | 0.1  | -2.34 | 0.12 | -3.6  | 0    | -1.36 | 0.38 | 0.51 | 2 | 0.77 | 0 |
| 3620   | 1.98  | 0.14 | 2.2   | 0.05 | 2.06  | 0.18 | 3.53  | 0    | 1.34  | 0.38 | 0.52 | 2 | 0.77 | 0 |
| 3627   | 3.09  | 0.1  | 3.03  | 0.01 | 2.64  | 0.09 | 3.36  | 0.01 | 2.26  | 0.67 | 3.98 | 2 | 0.14 | 0 |
| 3643   | -1.95 | 0.15 | -2.29 | 0.04 | -3.74 | 0.03 | -4.77 | 0    | -1.87 | 0.39 | 0.34 | 2 | 0.84 | 0 |
| 3670   | -1.29 | 0.27 | -3.01 | 0.01 | -2.26 | 0.14 | -3.74 | 0    | -1.45 | 0.39 | 1.82 | 2 | 0.4  | 0 |
| 3671   | 2.48  | 0.12 | 2.41  | 0.03 | 1.99  | 0.19 | 3.75  | 0    | 1.47  | 0.39 | 1.79 | 2 | 0.41 | 0 |
| 3689   | 2.35  | 0.12 | 2.98  | 0.01 | 1.98  | 0.2  | 3.6   | 0    | 1.67  | 0.46 | 2.48 | 2 | 0.29 | 0 |
| 3737   | -1.75 | 0.17 | -2.7  | 0.02 | -3.44 | 0.04 | -4.69 | 0    | -1.85 | 0.39 | 0.2  | 2 | 0.91 | 0 |
| 373863 | -2.1  | 0.14 | -3.62 | 0.01 | -2.54 | 0.1  | -3.39 | 0    | -2.07 | 0.61 | 3.64 | 2 | 0.16 | 0 |
| 3769   | -2.01 | 0.14 | -2.47 | 0.03 | -3.47 | 0.04 | -4.71 | 0    | -1.85 | 0.39 | 0.03 | 2 | 0.98 | 0 |
| 377    | 2.91  | 0.1  | 2.79  | 0.02 | 2.71  | 0.08 | 4.04  | 0    | 1.97  | 0.49 | 2.53 | 2 | 0.28 | 0 |
| 378    | 1.18  | 0.32 | 2.66  | 0.02 | 3.31  | 0.04 | 4.29  | 0    | 1.66  | 0.39 | 1.03 | 2 | 0.6  | 0 |
| 3781   | -2.35 | 0.12 | -1.96 | 0.08 | -1.61 | 0.3  | -3.2  | 0.01 | -1.22 | 0.38 | 1.74 | 2 | 0.42 | 0 |
| 3801   | -1.17 | 0.32 | -2.52 | 0.03 | -2.55 | 0.1  | -3.69 | 0    | -1.4  | 0.38 | 0.66 | 2 | 0.72 | 0 |
| 3816   | -1.37 | 0.24 | -2.76 | 0.02 | -2.32 | 0.13 | -3.72 | 0    | -1.43 | 0.38 | 0.98 | 2 | 0.61 | 0 |
| 388650 | 1.83  | 0.16 | 3.01  | 0.01 | 2.16  | 0.16 | 3.92  | 0    | 1.55  | 0.39 | 1.67 | 2 | 0.43 | 0 |
| 390    | 1.95  | 0.15 | 2.15  | 0.06 | 2.09  | 0.17 | 3.52  | 0    | 1.33  | 0.38 | 0.43 | 2 | 0.81 | 0 |
| 3915   | 1.61  | 0.19 | 3.01  | 0.01 | 2.18  | 0.15 | 3.84  | 0    | 1.5   | 0.39 | 1.68 | 2 | 0.43 | 0 |
| 3954   | -2.05 | 0.14 | -1.96 | 0.08 | -1.78 | 0.25 | -3.23 | 0.01 | -1.22 | 0.38 | 0.8  | 2 | 0.67 | 0 |
| 3956   | 2.27  | 0.13 | 2.25  | 0.05 | 2.15  | 0.16 | 3.73  | 0    | 1.44  | 0.39 | 0.93 | 2 | 0.63 | 0 |
| 397    | 2.62  | 0.11 | 3.49  | 0.01 | 2.71  | 0.08 | 3.83  | 0    | 2.23  | 0.58 | 3.17 | 2 | 0.21 | 0 |
| 3973   | -1.68 | 0.18 | -2.89 | 0.01 | -1.73 | 0.26 | -3.49 | 0    | -1.35 | 0.39 | 1.97 | 2 | 0.37 | 0 |
| 3976   | -1.36 | 0.25 | -3.02 | 0.01 | -3.28 | 0.04 | -4.53 | 0    | -1.79 | 0.4  | 1.24 | 2 | 0.54 | 0 |
| 3993   | -1    | 0.42 | -1.96 | 0.08 | -2.78 | 0.08 | -3.47 | 0    | -1.29 | 0.37 | 0.55 | 2 | 0.76 | 0 |
| 399664 | -1.12 | 0.34 | -1.41 | 0.21 | -2.82 | 0.07 | -3.24 | 0.01 | -1.19 | 0.37 | 0.73 | 2 | 0.69 | 0 |
| 4060   | 2.4   | 0.12 | 2.93  | 0.01 | 2.32  | 0.13 | 4.24  | 0    | 1.71  | 0.4  | 1.76 | 2 | 0.42 | 0 |
| 4067   | 2.93  | 0.11 | 2.75  | 0.02 | 2.28  | 0.14 | 3.29  | 0.01 | 1.93  | 0.59 | 3.42 | 2 | 0.18 | 0 |
| 4071   | 1.53  | 0.21 | 2.17  | 0.05 | 4.25  | 0.02 | 4.83  | 0    | 1.88  | 0.39 | 1.78 | 2 | 0.41 | 0 |
| 4117   | -1.3  | 0.27 | -3.03 | 0.01 | -3.03 | 0.06 | -4.32 | 0    | -1.7  | 0.39 | 1.43 | 2 | 0.49 | 0 |
| 4121   | 2.23  | 0.13 | 1.89  | 0.09 | 1.82  | 0.23 | 3.28  | 0.01 | 1.24  | 0.38 | 1.13 | 2 | 0.57 | 0 |
| 4122   | -1.85 | 0.16 | -1.04 | 0.36 | -3.21 | 0.05 | -3.59 | 0    | -1.34 | 0.37 | 1.93 | 2 | 0.38 | 0 |
| 4161   | -1.4  | 0.24 | -3.1  | 0.01 | -2.73 | 0.08 | -4.17 | 0    | -1.65 | 0.39 | 1.59 | 2 | 0.45 | 0 |
| 4162   | 2.09  | 0.14 | 2.42  | 0.03 | 1.88  | 0.22 | 3.56  | 0    | 1.37  | 0.38 | 1.1  | 2 | 0.58 | 0 |
| 4175   | 2.01  | 0.14 | 3.13  | 0.01 | 2.15  | 0.16 | 3.91  | 0    | 1.63  | 0.42 | 2.13 | 2 | 0.34 | 0 |
| 4191   | -1.57 | 0.2  | -1.06 | 0.35 | -3.06 | 0.06 | -3.39 | 0    | -1.25 | 0.37 | 1.5  | 2 | 0.47 | 0 |
| 4218   | 2.52  | 0.12 | 3.18  | 0.01 | 2.84  | 0.07 | 4.79  | 0    | 1.98  | 0.41 | 1.62 | 2 | 0.45 | 0 |
| 4222   | 1.42  | 0.23 | 1.84  | 0.1  | 2.27  | 0.14 | 3.25  | 0.01 | 1.2   | 0.37 | 0    | 2 | 1    | 0 |
| 4247   | 1.29  | 0.27 | 2.82  | 0.02 | 1.66  | 0.28 | 3.23  | 0.01 | 1.23  | 0.38 | 1.92 | 2 | 0.38 | 0 |
| 4253   | -1.9  | 0.15 | -3.13 | 0.01 | -2.51 | 0.1  | -4.26 | 0    | -1.7  | 0.4  | 1.5  | 2 | 0.47 | 0 |
| 4283   | 2.88  | 0.1  | 2.29  | 0.04 | 2.2   | 0.15 | 3.21  | 0.01 | 1.68  | 0.53 | 3.03 | 2 | 0.22 | 0 |
| 4303   | -2.34 | 0.12 | -2.19 | 0.05 | -2.08 | 0.17 | -3.66 | 0    | -1.41 | 0.39 | 1.15 | 2 | 0.56 | 0 |
| 4313   | 2.17  | 0.13 | 1.62  | 0.15 | 2.03  | 0.18 | 3.24  | 0.01 | 1.22  | 0.38 | 0.89 | 2 | 0.64 | 0 |
| 4332   | 2.25  | 0.13 | 2.65  | 0.02 | 1.89  | 0.22 | 3.73  | 0    | 1.46  | 0.39 | 1.72 | 2 | 0.42 | 0 |
| 4340   | -1.48 | 0.21 | -2.8  | 0.02 | -2.22 | 0.14 | -3.72 | 0    | -1.43 | 0.39 | 1.08 | 2 | 0.58 | 0 |
| 4478   | 2.13  | 0.14 | 3.03  | 0.01 | 2.73  | 0.08 | 4.49  | 0    | 1.81  | 0.4  | 0.97 | 2 | 0.62 | 0 |
| 4499   | 1.75  | 0.17 | 2.74  | 0.02 | 1.97  | 0.2  | 3.64  | 0    | 1.41  | 0.39 | 1.22 | 2 | 0.54 | 0 |
| 4582   | -1.25 | 0.29 | -3.18 | 0.01 | -2.23 | 0.14 | -3.3  | 0.01 | -1.5  | 0.46 | 2.56 | 2 | 0.28 | 0 |
| 4595   | -1.8  | 0.16 | -2.69 | 0.02 | -2.51 | 0.1  | -4.03 | 0    | -1.57 | 0.39 | 0.5  | 2 | 0.78 | 0 |
| 4599   | 0.79  | 0.58 | 2.42  | 0.03 | 3.53  | 0.03 | 4.09  | 0    | 1.57  | 0.38 | 2.02 | 2 | 0.36 | 0 |
| 4602   | -1.15 | 0.33 | -3.02 | 0.01 | -3.78 | 0.03 | -4.76 | 0    | -1.89 | 0.4  | 2.01 | 2 | 0.37 | 0 |
| 4610   | -1.73 | 0.17 | -2.54 | 0.03 | -1.71 | 0.27 | -3.35 | 0.01 | -1.28 | 0.38 | 1.15 | 2 | 0.56 | 0 |
| 4615   | 2.43  | 0.12 | 2.65  | 0.02 | 2.4   | 0.12 | 4.17  | 0    | 1.66  | 0.4  | 1.24 | 2 | 0.54 | 0 |
| 474344 | 0.97  | 0.44 | 2.44  | 0.03 | 3.42  | 0.04 | 4.14  | 0    | 1.58  | 0.38 | 1.42 | 2 | 0.49 | 0 |
| 4756   | -0.56 | 0.75 | -2.74 | 0.02 | -3.19 | 0.05 | -3.3  | 0.01 | -1.48 | 0.45 | 2.64 | 2 | 0.27 | 0 |
| 4837   | 3.49  | 0.1  | 3.22  | 0.01 | 4     | 0.02 | 3.43  | 0    | 3.15  | 0.92 | 5.42 | 2 | 0.07 | 0 |
| 488    | -1.32 | 0.26 | -1.2  | 0.29 | -2.95 | 0.06 | -3.28 | 0.01 | -1.2  | 0.37 | 1.09 | 2 | 0.58 | 0 |
| 4899   | -2.92 | 0.1  | -2.87 | 0.01 | -3.51 | 0.03 | -5.26 | 0    | -2.22 | 0.42 | 1.47 | 2 | 0.48 | 0 |
| 4907   | 1.52  | 0.21 | 1.66  | 0.14 | 3.22  | 0.05 | 3.83  | 0    | 1.43  | 0.37 | 0.71 | 2 | 0.7  | 0 |
| 4935   | -1.49 | 0.21 | -2.26 | 0.05 | -2.5  | 0.1  | -3.68 | 0    | -1.39 | 0.38 | 0.1  | 2 | 0.95 | 0 |
| 5007   | -1.56 | 0.2  | -1.83 | 0.1  | -3.73 | 0.03 | -4.3  | 0    | -1.63 | 0.38 | 1.23 | 2 | 0.54 | 0 |
| 50489  | -1.71 | 0.17 | -2.72 | 0.02 | -2.42 | 0.11 | -3.94 | 0    | -1.53 | 0.39 | 0.63 | 2 | 0.73 | 0 |
| 50628  | -0.67 | 0.68 | -2.74 | 0.02 | -2.26 | 0.14 | -3.29 | 0.01 | -1.26 | 0.38 | 2.03 | 2 | 0.36 | 0 |
| 50650  | 2.13  | 0.14 | 2.74  | 0.02 | 2.59  | 0.09 | 4.26  | 0    | 1.68  | 0.4  | 0.63 | 2 | 0.73 | 0 |
| 5071   | -1.48 | 0.22 | -1.5  | 0.18 | -2.34 | 0.13 | -3.13 | 0.01 | -1.15 | 0.37 | 0.13 | 2 | 0.94 | 0 |
| 5077   | -1.5  | 0.21 | -2.63 | 0.02 | -2.3  | 0.13 | -3.72 | 0    | -1.42 | 0.38 | 0.64 | 2 | 0.72 | 0 |
| 5080   | -1.38 | 0.24 | -2.28 | 0.04 | -1.97 | 0.2  | -3.25 | 0.01 | -1.22 | 0.37 | 0.4  | 2 | 0.82 | 0 |
| 50805  | -1.59 | 0.19 | -1.56 | 0.16 | -2.31 | 0.13 | -3.2  | 0.01 | -1.18 | 0.37 | 0.13 | 2 | 0.94 | 0 |
| 50810  | 2.47  | 0.12 | 1.19  | 0.29 | 3.3   | 0.04 | 3.29  | 0.01 | 1.54  | 0.47 | 2.77 | 2 | 0.25 | 0 |
| 51026  | 1.93  | 0.15 | 2.21  | 0.05 | 2.72  | 0.08 | 3.99  | 0    | 1.53  | 0.38 | 0.06 | 2 | 0.97 | 0 |

|       |       |      |       |      |       |      |       |      |       |      |      |   |      |   |
|-------|-------|------|-------|------|-------|------|-------|------|-------|------|------|---|------|---|
| 51056 | 1.44  | 0.23 | 3.75  | 0    | 3.15  | 0.05 | 3.16  | 0.01 | 2.08  | 0.66 | 4.32 | 2 | 0.12 | 0 |
| 51090 | -1.17 | 0.32 | -2.57 | 0.02 | -2.03 | 0.18 | -3.33 | 0.01 | -1.26 | 0.38 | 0.96 | 2 | 0.62 | 0 |
| 5111  | 2.33  | 0.12 | 3.24  | 0.01 | 2.4   | 0.12 | 4.06  | 0    | 1.85  | 0.46 | 2.34 | 2 | 0.31 | 0 |
| 51177 | 1.88  | 0.15 | 3.08  | 0.01 | 2.03  | 0.18 | 3.76  | 0    | 1.55  | 0.41 | 2.12 | 2 | 0.35 | 0 |
| 51186 | 2.41  | 0.12 | 2.81  | 0.02 | 3.1   | 0.05 | 4.78  | 0    | 1.93  | 0.4  | 0.48 | 2 | 0.79 | 0 |
| 51195 | -1.37 | 0.24 | -1.41 | 0.21 | -3.03 | 0.06 | -3.49 | 0    | -1.29 | 0.37 | 0.87 | 2 | 0.65 | 0 |
| 51206 | -1.53 | 0.2  | -2.73 | 0.02 | -2    | 0.19 | -3.56 | 0    | -1.37 | 0.38 | 1.14 | 2 | 0.57 | 0 |
| 5126  | -1.4  | 0.24 | -3.19 | 0.01 | -2.93 | 0.06 | -4.35 | 0    | -1.73 | 0.4  | 1.77 | 2 | 0.41 | 0 |
| 51279 | 2.03  | 0.14 | 1.27  | 0.26 | 2.66  | 0.09 | 3.43  | 0    | 1.28  | 0.37 | 1.06 | 2 | 0.59 | 0 |
| 51289 | -1.26 | 0.28 | -2.1  | 0.06 | -2.09 | 0.17 | -3.2  | 0.01 | -1.19 | 0.37 | 0.18 | 2 | 0.91 | 0 |
| 51296 | 1.1   | 0.35 | 1.88  | 0.09 | 3.11  | 0.05 | 3.7   | 0    | 1.38  | 0.37 | 0.78 | 2 | 0.68 | 0 |
| 51338 | 1.56  | 0.2  | 2.75  | 0.02 | 2.74  | 0.08 | 4.12  | 0    | 1.6   | 0.39 | 0.53 | 2 | 0.77 | 0 |
| 51341 | -1.34 | 0.25 | -1.67 | 0.14 | -2.59 | 0.09 | -3.34 | 0.01 | -1.23 | 0.37 | 0.17 | 2 | 0.92 | 0 |
| 51371 | 1.2   | 0.31 | 3.12  | 0.01 | 3.03  | 0.06 | 4.29  | 0    | 1.69  | 0.39 | 1.88 | 2 | 0.39 | 0 |
| 51388 | 2.04  | 0.14 | 1.17  | 0.3  | 2.51  | 0.1  | 3.27  | 0.01 | 1.22  | 0.37 | 1.15 | 2 | 0.56 | 0 |
| 51510 | 2.14  | 0.13 | 3.12  | 0.01 | 2.64  | 0.09 | 4.46  | 0    | 1.8   | 0.4  | 1.36 | 2 | 0.51 | 0 |
| 51569 | 2.47  | 0.12 | 3.21  | 0.01 | 2.05  | 0.18 | 3.3   | 0.01 | 1.88  | 0.57 | 3.33 | 2 | 0.19 | 0 |
| 51616 | -1.44 | 0.23 | -2.69 | 0.02 | -1.81 | 0.24 | -3.37 | 0    | -1.28 | 0.38 | 1.31 | 2 | 0.52 | 0 |
| 51643 | 1.92  | 0.15 | 3.05  | 0.01 | 2.79  | 0.08 | 4.45  | 0    | 1.78  | 0.4  | 0.92 | 2 | 0.63 | 0 |
| 51651 | 1.17  | 0.32 | 2.97  | 0.01 | 2.88  | 0.07 | 4.11  | 0    | 1.6   | 0.39 | 1.52 | 2 | 0.47 | 0 |
| 5168  | 2.1   | 0.14 | 2.44  | 0.03 | 1.91  | 0.21 | 3.6   | 0    | 1.39  | 0.39 | 1.1  | 2 | 0.58 | 0 |
| 5175  | 1.77  | 0.17 | 3     | 0.01 | 3.77  | 0.03 | 5.08  | 0    | 2.05  | 0.4  | 0.52 | 2 | 0.77 | 0 |
| 5176  | 2.46  | 0.12 | 1.44  | 0.2  | 2.08  | 0.17 | 3.26  | 0.01 | 1.23  | 0.38 | 1.87 | 2 | 0.39 | 0 |
| 51760 | -1.23 | 0.3  | -1.72 | 0.12 | -3.3  | 0.04 | -3.78 | 0    | -1.41 | 0.37 | 1.01 | 2 | 0.6  | 0 |
| 53    | 2.08  | 0.14 | 1.28  | 0.26 | 2.44  | 0.11 | 3.3   | 0.01 | 1.23  | 0.37 | 1.03 | 2 | 0.6  | 0 |
| 53335 | -1.13 | 0.34 | -3.43 | 0.01 | -3.26 | 0.04 | -3.47 | 0    | -1.85 | 0.53 | 3.2  | 2 | 0.2  | 0 |
| 5352  | 1.91  | 0.15 | 1.02  | 0.37 | 2.8   | 0.07 | 3.33  | 0.01 | 1.23  | 0.37 | 1.48 | 2 | 0.48 | 0 |
| 5359  | 1.7   | 0.17 | 3.53  | 0.01 | 3.14  | 0.05 | 4.17  | 0    | 2     | 0.48 | 2.52 | 2 | 0.28 | 0 |
| 5360  | 2.61  | 0.11 | 3.16  | 0.01 | 2.74  | 0.08 | 4.72  | 0    | 1.96  | 0.42 | 1.98 | 2 | 0.37 | 0 |
| 53615 | -1.76 | 0.17 | -2.32 | 0.04 | -1.67 | 0.28 | -3.22 | 0.01 | -1.22 | 0.38 | 0.86 | 2 | 0.65 | 0 |
| 5362  | -0.76 | 0.61 | -2.6  | 0.02 | -2.85 | 0.07 | -3.72 | 0    | -1.41 | 0.38 | 1.61 | 2 | 0.45 | 0 |
| 53637 | -1.67 | 0.18 | -1.85 | 0.1  | -2.07 | 0.18 | -3.22 | 0.01 | -1.2  | 0.37 | 0.1  | 2 | 0.95 | 0 |
| 53832 | -1.3  | 0.27 | -1.94 | 0.08 | -2.17 | 0.15 | -3.18 | 0.01 | -1.18 | 0.37 | 0.05 | 2 | 0.98 | 0 |
| 53904 | -1.8  | 0.16 | -2.15 | 0.06 | -1.76 | 0.25 | -3.22 | 0.01 | -1.21 | 0.38 | 0.59 | 2 | 0.74 | 0 |
| 540   | -1.78 | 0.16 | -3    | 0.01 | -2.12 | 0.16 | -3.87 | 0    | -1.52 | 0.39 | 1.69 | 2 | 0.43 | 0 |
| 5426  | -1.04 | 0.39 | -1.84 | 0.1  | -2.46 | 0.11 | -3.2  | 0.01 | -1.18 | 0.37 | 0.27 | 2 | 0.88 | 0 |
| 54361 | -1.53 | 0.2  | -1.76 | 0.12 | -3.64 | 0.03 | -4.19 | 0    | -1.58 | 0.38 | 1.21 | 2 | 0.55 | 0 |
| 5440  | 0.72  | 0.64 | 2.78  | 0.02 | 3.85  | 0.02 | 3.42  | 0    | 1.69  | 0.49 | 3.09 | 2 | 0.21 | 0 |
| 54566 | -1.24 | 0.29 | -3.09 | 0.01 | -3.01 | 0.06 | -4.29 | 0    | -1.69 | 0.39 | 1.7  | 2 | 0.43 | 0 |
| 5465  | -1.84 | 0.16 | -1.57 | 0.16 | -3.1  | 0.05 | -3.85 | 0    | -1.45 | 0.38 | 0.71 | 2 | 0.7  | 0 |
| 547   | -1.33 | 0.26 | -3.3  | 0.01 | -2.34 | 0.13 | -3.27 | 0.01 | -1.61 | 0.49 | 2.84 | 2 | 0.24 | 0 |
| 54784 | -1.75 | 0.17 | -1.81 | 0.11 | -2.55 | 0.1  | -3.57 | 0    | -1.34 | 0.37 | 0.1  | 2 | 0.95 | 0 |
| 5479  | 2.57  | 0.11 | 3.74  | 0    | 3.28  | 0.04 | 4.23  | 0    | 2.51  | 0.59 | 3.06 | 2 | 0.22 | 0 |
| 54845 | -2.04 | 0.14 | -2.47 | 0.03 | -2.08 | 0.17 | -3.72 | 0    | -1.43 | 0.39 | 0.81 | 2 | 0.67 | 0 |
| 54894 | -1.29 | 0.27 | -2.48 | 0.03 | -2.49 | 0.1  | -3.68 | 0    | -1.4  | 0.38 | 0.46 | 2 | 0.79 | 0 |
| 54897 | -2.57 | 0.11 | -1.34 | 0.23 | -2.43 | 0.11 | -3.21 | 0.01 | -1.34 | 0.42 | 2.3  | 2 | 0.32 | 0 |
| 54951 | 1.65  | 0.18 | 2.22  | 0.05 | 2.63  | 0.09 | 3.81  | 0    | 1.45  | 0.38 | 0.02 | 2 | 0.99 | 0 |
| 54961 | -0.97 | 0.44 | -2.81 | 0.02 | -2.43 | 0.11 | -3.62 | 0    | -1.39 | 0.38 | 1.59 | 2 | 0.45 | 0 |
| 54964 | -1.85 | 0.16 | -2.09 | 0.06 | -2.6  | 0.09 | -3.81 | 0    | -1.45 | 0.38 | 0.05 | 2 | 0.98 | 0 |
| 55012 | 2     | 0.14 | 2.81  | 0.02 | 1.82  | 0.23 | 3.66  | 0    | 1.43  | 0.39 | 1.8  | 2 | 0.41 | 0 |
| 55051 | -1.26 | 0.28 | -1.64 | 0.14 | -2.65 | 0.09 | -3.33 | 0.01 | -1.23 | 0.37 | 0.27 | 2 | 0.87 | 0 |
| 55057 | -1.54 | 0.2  | -2.08 | 0.06 | -3.6  | 0.03 | -4.35 | 0    | -1.66 | 0.38 | 0.7  | 2 | 0.7  | 0 |
| 55080 | 2.1   | 0.14 | 1.68  | 0.13 | 2.24  | 0.14 | 3.41  | 0    | 1.28  | 0.38 | 0.62 | 2 | 0.73 | 0 |
| 55090 | -1.82 | 0.16 | -2.01 | 0.07 | -2.08 | 0.17 | -3.38 | 0    | -1.27 | 0.38 | 0.24 | 2 | 0.89 | 0 |
| 55095 | -0.83 | 0.55 | -2.64 | 0.02 | -1.94 | 0.21 | -3.13 | 0.01 | -1.18 | 0.38 | 1.59 | 2 | 0.45 | 0 |
| 55117 | -1.45 | 0.22 | -3.03 | 0.01 | -2.57 | 0.09 | -4.06 | 0    | -1.59 | 0.39 | 1.41 | 2 | 0.49 | 0 |
| 55227 | -1.23 | 0.29 | -2.32 | 0.04 | -2.28 | 0.14 | -3.42 | 0    | -1.28 | 0.38 | 0.36 | 2 | 0.83 | 0 |
| 55233 | 1.83  | 0.16 | 2     | 0.07 | 3.53  | 0.03 | 4.39  | 0    | 1.68  | 0.38 | 0.52 | 2 | 0.77 | 0 |
| 55283 | -0.77 | 0.6  | -2.86 | 0.01 | -2.57 | 0.09 | -3.51 | 0    | -1.4  | 0.4  | 2.13 | 2 | 0.35 | 0 |
| 55303 | 2.11  | 0.14 | 2.5   | 0.03 | 3.43  | 0.04 | 4.74  | 0    | 1.87  | 0.4  | 0.02 | 2 | 0.99 | 0 |
| 55323 | 1.82  | 0.16 | 1.78  | 0.11 | 2.11  | 0.17 | 3.27  | 0.01 | 1.22  | 0.37 | 0.22 | 2 | 0.9  | 0 |
| 55367 | -1.25 | 0.28 | -2.82 | 0.02 | -1.66 | 0.29 | -3.21 | 0.01 | -1.23 | 0.38 | 1.96 | 2 | 0.37 | 0 |
| 55374 | -0.84 | 0.54 | -1.89 | 0.09 | -2.76 | 0.08 | -3.34 | 0.01 | -1.23 | 0.37 | 0.77 | 2 | 0.68 | 0 |
| 5547  | 2.5   | 0.12 | 2.44  | 0.03 | 2.59  | 0.09 | 4.23  | 0    | 1.67  | 0.4  | 1.02 | 2 | 0.6  | 0 |
| 5552  | 2.73  | 0.11 | 3.46  | 0.01 | 2.55  | 0.1  | 3.5   | 0    | 2.27  | 0.65 | 3.77 | 2 | 0.15 | 0 |
| 55601 | 1.98  | 0.14 | 2.44  | 0.03 | 2.79  | 0.08 | 4.19  | 0    | 1.63  | 0.39 | 0.1  | 2 | 0.95 | 0 |
| 55616 | -0.9  | 0.5  | -2.62 | 0.02 | -2.68 | 0.09 | -3.68 | 0    | -1.4  | 0.38 | 1.28 | 2 | 0.53 | 0 |
| 55670 | -0.3  | 0.9  | -2.15 | 0.06 | -2.66 | 0.09 | -3.14 | 0.01 | -1.16 | 0.37 | 1.93 | 2 | 0.38 | 0 |
| 55748 | 2.4   | 0.12 | 2.17  | 0.05 | 2.21  | 0.15 | 3.77  | 0    | 1.46  | 0.39 | 1.14 | 2 | 0.57 | 0 |
| 55765 | -1.71 | 0.17 | -3.4  | 0.01 | -3.51 | 0.03 | -5.02 | 0    | -2.07 | 0.41 | 1.62 | 2 | 0.44 | 0 |
| 55790 | 1.58  | 0.2  | 2.92  | 0.01 | 2.1   | 0.17 | 3.73  | 0    | 1.45  | 0.39 | 1.5  | 2 | 0.47 | 0 |

|        |       |      |       |      |       |      |       |      |       |      |      |   |      |   |
|--------|-------|------|-------|------|-------|------|-------|------|-------|------|------|---|------|---|
| 55803  | 2.65  | 0.11 | 2.84  | 0.02 | 2.35  | 0.12 | 4.05  | 0    | 1.77  | 0.44 | 2.22 | 2 | 0.33 | 0 |
| 55806  | -1.34 | 0.25 | -2.92 | 0.01 | -2.24 | 0.14 | -3.72 | 0    | -1.44 | 0.39 | 1.53 | 2 | 0.47 | 0 |
| 55830  | 1.52  | 0.21 | 2.75  | 0.02 | 1.48  | 0.35 | 3.18  | 0.01 | 1.22  | 0.38 | 1.96 | 2 | 0.37 | 0 |
| 5610   | 1.12  | 0.34 | 1.82  | 0.1  | 3.08  | 0.05 | 3.65  | 0    | 1.36  | 0.37 | 0.75 | 2 | 0.69 | 0 |
| 56165  | -2    | 0.14 | -2.33 | 0.04 | -2.54 | 0.1  | -3.96 | 0    | -1.52 | 0.39 | 0.2  | 2 | 0.9  | 0 |
| 5641   | 2.62  | 0.11 | 3.59  | 0.01 | 3.18  | 0.05 | 4.54  | 0    | 2.37  | 0.52 | 2.57 | 2 | 0.28 | 0 |
| 5682   | 0.99  | 0.43 | 2.31  | 0.04 | 2.62  | 0.09 | 3.54  | 0    | 1.33  | 0.38 | 0.66 | 2 | 0.72 | 0 |
| 56944  | 2.11  | 0.14 | 2.01  | 0.07 | 1.81  | 0.24 | 3.3   | 0.01 | 1.25  | 0.38 | 0.9  | 2 | 0.64 | 0 |
| 56957  | -3.08 | 0.1  | -2.2  | 0.05 | -3.29 | 0.04 | -3.67 | 0    | -2.02 | 0.55 | 3.11 | 2 | 0.21 | 0 |
| 56980  | -2.31 | 0.12 | -1.51 | 0.18 | -3.03 | 0.06 | -3.93 | 0    | -1.5  | 0.38 | 1.36 | 2 | 0.51 | 0 |
| 56998  | -2.12 | 0.14 | -1.99 | 0.08 | -1.93 | 0.21 | -3.38 | 0    | -1.28 | 0.38 | 0.78 | 2 | 0.68 | 0 |
| 57102  | 1.33  | 0.26 | 1.79  | 0.11 | 2.28  | 0.13 | 3.19  | 0.01 | 1.18  | 0.37 | 0.02 | 2 | 0.99 | 0 |
| 57122  | 1.86  | 0.16 | 2.06  | 0.07 | 3.62  | 0.03 | 4.5   | 0    | 1.74  | 0.39 | 0.53 | 2 | 0.77 | 0 |
| 57144  | -1.34 | 0.25 | -2.51 | 0.03 | -1.98 | 0.2  | -3.35 | 0.01 | -1.27 | 0.38 | 0.77 | 2 | 0.68 | 0 |
| 5716   | 1.09  | 0.36 | 2.39  | 0.04 | 2.68  | 0.08 | 3.67  | 0    | 1.38  | 0.38 | 0.61 | 2 | 0.74 | 0 |
| 5725   | 2.07  | 0.14 | 3.23  | 0.01 | 1.89  | 0.21 | 3.2   | 0.01 | 1.69  | 0.53 | 3.09 | 2 | 0.21 | 0 |
| 5753   | -1.63 | 0.19 | -2.2  | 0.05 | -2.61 | 0.09 | -3.78 | 0    | -1.43 | 0.38 | 0.02 | 2 | 0.99 | 0 |
| 57604  | -2.46 | 0.12 | -3.02 | 0.01 | -2.25 | 0.14 | -4.01 | 0    | -1.76 | 0.44 | 2.23 | 2 | 0.33 | 0 |
| 57715  | -1.44 | 0.23 | -2.47 | 0.03 | -1.79 | 0.24 | -3.24 | 0.01 | -1.22 | 0.38 | 0.84 | 2 | 0.66 | 0 |
| 57718  | -1.37 | 0.24 | -3.38 | 0.01 | -2.37 | 0.12 | -3.19 | 0.01 | -1.66 | 0.52 | 3.1  | 2 | 0.21 | 0 |
| 57835  | -1.5  | 0.21 | -2.87 | 0.01 | -3.19 | 0.05 | -4.47 | 0    | -1.76 | 0.39 | 0.7  | 2 | 0.71 | 0 |
| 5908   | 1.7   | 0.17 | 3.55  | 0.01 | 2.42  | 0.11 | 3.17  | 0.01 | 1.86  | 0.58 | 3.6  | 2 | 0.17 | 0 |
| 5909   | -1.4  | 0.24 | -2.21 | 0.05 | -2.13 | 0.16 | -3.35 | 0.01 | -1.25 | 0.37 | 0.21 | 2 | 0.9  | 0 |
| 5920   | 2.57  | 0.11 | 3.71  | 0    | 2.75  | 0.08 | 3.47  | 0    | 2.41  | 0.69 | 4.11 | 2 | 0.13 | 0 |
| 59340  | -1.69 | 0.18 | -3.34 | 0.01 | -2.37 | 0.12 | -3.62 | 0    | -1.71 | 0.47 | 2.58 | 2 | 0.28 | 0 |
| 59342  | 2.4   | 0.12 | 2.7   | 0.02 | 2.5   | 0.1  | 4.27  | 0    | 1.7   | 0.4  | 1.08 | 2 | 0.58 | 0 |
| 5965   | 1.81  | 0.16 | 2.39  | 0.04 | 2.53  | 0.1  | 3.9   | 0    | 1.5   | 0.38 | 0.14 | 2 | 0.93 | 0 |
| 5976   | -0.54 | 0.76 | -1.52 | 0.18 | -2.98 | 0.06 | -3.13 | 0.01 | -1.14 | 0.37 | 1.73 | 2 | 0.42 | 0 |
| 598    | 2.27  | 0.13 | 1.19  | 0.29 | 3.41  | 0.04 | 3.52  | 0    | 1.51  | 0.43 | 2.45 | 2 | 0.29 | 0 |
| 60     | 1.31  | 0.27 | 2.86  | 0.01 | 2.16  | 0.15 | 3.62  | 0    | 1.4   | 0.39 | 1.44 | 2 | 0.49 | 0 |
| 6002   | -1.33 | 0.26 | -2.31 | 0.04 | -2.38 | 0.12 | -3.54 | 0    | -1.33 | 0.38 | 0.26 | 2 | 0.88 | 0 |
| 6035   | 2.54  | 0.12 | 3.36  | 0.01 | 2.92  | 0.07 | 4.82  | 0    | 2.08  | 0.43 | 2.07 | 2 | 0.36 | 0 |
| 60485  | 1.13  | 0.34 | 2.85  | 0.02 | 2.18  | 0.15 | 3.54  | 0    | 1.36  | 0.38 | 1.59 | 2 | 0.45 | 0 |
| 60559  | 2.38  | 0.12 | 2.93  | 0.01 | 4.11  | 0.02 | 5.58  | 0    | 2.32  | 0.42 | 0.01 | 2 | 1    | 0 |
| 607    | -2.25 | 0.13 | -3.15 | 0.01 | -2.33 | 0.13 | -4.21 | 0    | -1.74 | 0.41 | 2.06 | 2 | 0.36 | 0 |
| 6097   | -2.43 | 0.12 | -2.95 | 0.01 | -2.5  | 0.1  | -4.39 | 0    | -1.78 | 0.4  | 1.54 | 2 | 0.46 | 0 |
| 6184   | 2.2   | 0.13 | 2.81  | 0.02 | 3.07  | 0.06 | 4.68  | 0    | 1.88  | 0.4  | 0.29 | 2 | 0.87 | 0 |
| 6239   | -1.24 | 0.29 | -2.1  | 0.06 | -2.88 | 0.07 | -3.73 | 0    | -1.4  | 0.38 | 0.33 | 2 | 0.85 | 0 |
| 6257   | -1.93 | 0.15 | -3.18 | 0.01 | -1.85 | 0.23 | -3.2  | 0.01 | -1.61 | 0.5  | 2.89 | 2 | 0.24 | 0 |
| 6297   | -1.32 | 0.26 | -3.18 | 0.01 | -2.05 | 0.18 | -3.16 | 0.01 | -1.48 | 0.47 | 2.68 | 2 | 0.26 | 0 |
| 6303   | 2.35  | 0.12 | 3.19  | 0.01 | 2.65  | 0.09 | 4.58  | 0    | 1.88  | 0.41 | 1.73 | 2 | 0.42 | 0 |
| 6352   | 2.53  | 0.12 | 2.85  | 0.02 | 2.26  | 0.14 | 4.14  | 0    | 1.7   | 0.41 | 2.05 | 2 | 0.36 | 0 |
| 6355   | 2.22  | 0.13 | 2.67  | 0.02 | 2.9   | 0.07 | 4.49  | 0    | 1.78  | 0.4  | 0.32 | 2 | 0.85 | 0 |
| 6373   | 3.05  | 0.11 | 2.11  | 0.06 | 2.65  | 0.09 | 3.16  | 0.01 | 1.83  | 0.58 | 3.49 | 2 | 0.17 | 0 |
| 63827  | -1.77 | 0.17 | -3.56 | 0.01 | -2.36 | 0.12 | -3.14 | 0.01 | -1.87 | 0.6  | 3.71 | 2 | 0.16 | 0 |
| 6387   | 2.31  | 0.12 | 3.32  | 0.01 | 2.52  | 0.1  | 4.13  | 0    | 1.92  | 0.46 | 2.37 | 2 | 0.31 | 0 |
| 63876  | -1.4  | 0.24 | -2.79 | 0.02 | -2.17 | 0.15 | -3.64 | 0    | -1.4  | 0.38 | 1.16 | 2 | 0.56 | 0 |
| 63893  | -1.76 | 0.17 | -2.98 | 0.01 | -3.05 | 0.06 | -4.54 | 0    | -1.81 | 0.4  | 0.65 | 2 | 0.72 | 0 |
| 63925  | -1.1  | 0.35 | -2.23 | 0.05 | -2.93 | 0.06 | -3.76 | 0    | -1.42 | 0.38 | 0.58 | 2 | 0.75 | 0 |
| 6405   | -0.81 | 0.57 | -2.38 | 0.04 | -2.91 | 0.07 | -3.68 | 0    | -1.39 | 0.38 | 1.22 | 2 | 0.54 | 0 |
| 64092  | 2.07  | 0.14 | 2.16  | 0.06 | 1.84  | 0.23 | 3.38  | 0    | 1.29  | 0.38 | 0.88 | 2 | 0.65 | 0 |
| 64123  | 1.39  | 0.24 | 3.59  | 0.01 | 3.84  | 0.02 | 3.9   | 0    | 2.16  | 0.55 | 3.22 | 2 | 0.2  | 0 |
| 64135  | 1.66  | 0.18 | 2.62  | 0.02 | 2.6   | 0.09 | 4.01  | 0    | 1.55  | 0.39 | 0.35 | 2 | 0.84 | 0 |
| 64284  | -2.03 | 0.14 | -2.51 | 0.03 | -2.22 | 0.14 | -3.83 | 0    | -1.48 | 0.39 | 0.67 | 2 | 0.72 | 0 |
| 64343  | 1.06  | 0.38 | 1.96  | 0.08 | 2.28  | 0.13 | 3.15  | 0.01 | 1.16  | 0.37 | 0.21 | 2 | 0.9  | 0 |
| 64375  | -2.48 | 0.12 | -2.75 | 0.02 | -1.87 | 0.22 | -3.46 | 0    | -1.59 | 0.46 | 2.49 | 2 | 0.29 | 0 |
| 64429  | 1.05  | 0.39 | 2.1   | 0.06 | 2.17  | 0.15 | 3.14  | 0.01 | 1.16  | 0.37 | 0.32 | 2 | 0.85 | 0 |
| 6464   | 0.98  | 0.43 | 2.57  | 0.02 | 3.11  | 0.05 | 4     | 0    | 1.53  | 0.38 | 1.21 | 2 | 0.55 | 0 |
| 64763  | -1.53 | 0.2  | -1.89 | 0.09 | -2.6  | 0.09 | -3.56 | 0    | -1.33 | 0.37 | 0.03 | 2 | 0.98 | 0 |
| 64793  | -1.36 | 0.25 | -2.58 | 0.02 | -2.04 | 0.18 | -3.44 | 0    | -1.3  | 0.38 | 0.84 | 2 | 0.66 | 0 |
| 64925  | -1.85 | 0.16 | -3.53 | 0.01 | -2.95 | 0.06 | -4.14 | 0    | -1.99 | 0.48 | 2.51 | 2 | 0.29 | 0 |
| 6507   | 2.25  | 0.13 | 1.71  | 0.13 | 2.21  | 0.15 | 3.46  | 0    | 1.31  | 0.38 | 0.93 | 2 | 0.63 | 0 |
| 6509   | -1.86 | 0.15 | -2.16 | 0.05 | -2.82 | 0.07 | -4.01 | 0    | -1.53 | 0.38 | 0.02 | 2 | 0.99 | 0 |
| 65095  | -1.15 | 0.33 | -1.53 | 0.17 | -3.02 | 0.06 | -3.45 | 0    | -1.27 | 0.37 | 0.87 | 2 | 0.65 | 0 |
| 653483 | -1.77 | 0.17 | -2.52 | 0.03 | -2.54 | 0.1  | -3.96 | 0    | -1.53 | 0.39 | 0.24 | 2 | 0.89 | 0 |
| 6545   | -1.48 | 0.21 | -3.05 | 0.01 | -1.96 | 0.2  | -3.46 | 0    | -1.43 | 0.41 | 2.19 | 2 | 0.33 | 0 |
| 658    | -2.45 | 0.12 | -2.96 | 0.01 | -2.98 | 0.06 | -4.77 | 0    | -1.95 | 0.41 | 0.84 | 2 | 0.66 | 0 |
| 65989  | -1.71 | 0.17 | -2.91 | 0.01 | -2.36 | 0.12 | -3.98 | 0    | -1.56 | 0.39 | 1.12 | 2 | 0.57 | 0 |
| 66002  | -1.51 | 0.21 | -3.22 | 0.01 | -2.68 | 0.08 | -4.24 | 0    | -1.69 | 0.4  | 1.89 | 2 | 0.39 | 0 |
| 6608   | -2.02 | 0.14 | -3.51 | 0.01 | -3.09 | 0.05 | -4.74 | 0    | -2.04 | 0.43 | 2.1  | 2 | 0.35 | 0 |
| 6614   | 1.3   | 0.27 | 2.96  | 0.01 | 3.6   | 0.03 | 4.7   | 0    | 1.86  | 0.4  | 1.37 | 2 | 0.5  | 0 |

|       |       |      |       |      |       |      |       |      |       |      |      |   |      |   |
|-------|-------|------|-------|------|-------|------|-------|------|-------|------|------|---|------|---|
| 6624  | 2.74  | 0.11 | 1.65  | 0.14 | 2.61  | 0.09 | 3.42  | 0    | 1.52  | 0.44 | 2.45 | 2 | 0.29 | 0 |
| 6663  | -0.97 | 0.44 | -3.15 | 0.01 | -3.63 | 0.03 | -3.8  | 0    | -1.82 | 0.48 | 2.76 | 2 | 0.25 | 0 |
| 6665  | -1.48 | 0.21 | -2.99 | 0.01 | -1.84 | 0.23 | -3.42 | 0    | -1.38 | 0.4  | 2.12 | 2 | 0.35 | 0 |
| 6672  | 2.27  | 0.13 | 2.9   | 0.01 | 2.54  | 0.1  | 4.34  | 0    | 1.74  | 0.4  | 1.1  | 2 | 0.58 | 0 |
| 6695  | 0.74  | 0.62 | 2     | 0.08 | 2.49  | 0.1  | 3.16  | 0.01 | 1.17  | 0.37 | 0.74 | 2 | 0.69 | 0 |
| 6712  | -1.2  | 0.31 | -2.16 | 0.05 | -2.45 | 0.11 | -3.45 | 0    | -1.29 | 0.37 | 0.24 | 2 | 0.89 | 0 |
| 6717  | 1.47  | 0.22 | 3.2   | 0.01 | 2.16  | 0.16 | 3.44  | 0    | 1.54  | 0.45 | 2.45 | 2 | 0.29 | 0 |
| 6737  | 2.15  | 0.13 | 2.29  | 0.04 | 2     | 0.19 | 3.6   | 0    | 1.38  | 0.38 | 0.9  | 2 | 0.64 | 0 |
| 6741  | 1.08  | 0.36 | 3.47  | 0.01 | 3.57  | 0.03 | 3.43  | 0    | 1.94  | 0.57 | 3.55 | 2 | 0.17 | 0 |
| 6770  | -0.82 | 0.56 | -2.37 | 0.04 | -2.76 | 0.08 | -3.58 | 0    | -1.34 | 0.38 | 1.09 | 2 | 0.58 | 0 |
| 6772  | 2.09  | 0.14 | 2.83  | 0.02 | 2.83  | 0.07 | 4.46  | 0    | 1.78  | 0.4  | 0.47 | 2 | 0.79 | 0 |
| 6782  | 2.37  | 0.12 | 1.23  | 0.28 | 2.84  | 0.07 | 3.64  | 0    | 1.38  | 0.38 | 1.97 | 2 | 0.37 | 0 |
| 684   | 2.2   | 0.13 | 3.62  | 0.01 | 3.49  | 0.03 | 5.31  | 0    | 2.27  | 0.43 | 1.96 | 2 | 0.38 | 0 |
| 6868  | 1.98  | 0.14 | 1.44  | 0.2  | 3.03  | 0.06 | 3.77  | 0    | 1.42  | 0.38 | 0.97 | 2 | 0.62 | 0 |
| 6897  | 1.29  | 0.27 | 2.66  | 0.02 | 1.81  | 0.24 | 3.27  | 0.01 | 1.24  | 0.38 | 1.28 | 2 | 0.53 | 0 |
| 6925  | 1.79  | 0.16 | 3.02  | 0.01 | 1.72  | 0.27 | 3.24  | 0.01 | 1.46  | 0.45 | 2.48 | 2 | 0.29 | 0 |
| 6990  | 1.11  | 0.35 | 3.18  | 0.01 | 2.55  | 0.1  | 3.5   | 0    | 1.56  | 0.44 | 2.46 | 2 | 0.29 | 0 |
| 7018  | -1.26 | 0.28 | -2.73 | 0.02 | -1.7  | 0.27 | -3.21 | 0.01 | -1.22 | 0.38 | 1.62 | 2 | 0.44 | 0 |
| 7020  | -1.68 | 0.18 | -3.55 | 0.01 | -2.59 | 0.09 | -3.36 | 0.01 | -1.89 | 0.56 | 3.33 | 2 | 0.19 | 0 |
| 7021  | -1.28 | 0.27 | -2.99 | 0.01 | -2.31 | 0.13 | -3.77 | 0    | -1.46 | 0.39 | 1.74 | 2 | 0.42 | 0 |
| 7026  | 0.53  | 0.78 | 2.67  | 0.02 | 2.7   | 0.08 | 3.29  | 0.01 | 1.33  | 0.41 | 2.24 | 2 | 0.33 | 0 |
| 7035  | 1.94  | 0.15 | 1.62  | 0.15 | 3.44  | 0.04 | 4.14  | 0    | 1.57  | 0.38 | 1.07 | 2 | 0.59 | 0 |
| 7048  | 1.8   | 0.16 | 3.47  | 0.01 | 2.44  | 0.11 | 3.46  | 0    | 1.84  | 0.53 | 3.05 | 2 | 0.22 | 0 |
| 7058  | 2.13  | 0.14 | 0.98  | 0.39 | 2.47  | 0.11 | 3.15  | 0.01 | 1.17  | 0.37 | 1.66 | 2 | 0.44 | 0 |
| 7091  | 1.97  | 0.15 | 2.27  | 0.04 | 1.71  | 0.27 | 3.31  | 0.01 | 1.26  | 0.38 | 0.98 | 2 | 0.61 | 0 |
| 7097  | 2.44  | 0.12 | 1.63  | 0.15 | 2     | 0.19 | 3.31  | 0.01 | 1.26  | 0.38 | 1.66 | 2 | 0.44 | 0 |
| 710   | 1.84  | 0.16 | 3.24  | 0.01 | 3.41  | 0.04 | 4.95  | 0    | 2.02  | 0.41 | 0.96 | 2 | 0.62 | 0 |
| 712   | 2.63  | 0.11 | 3.94  | 0    | 3.46  | 0.04 | 3.82  | 0    | 2.8   | 0.73 | 4.08 | 2 | 0.13 | 0 |
| 7130  | 2.47  | 0.12 | 1.14  | 0.31 | 3.26  | 0.04 | 3.18  | 0.01 | 1.52  | 0.48 | 2.88 | 2 | 0.24 | 0 |
| 715   | 2.26  | 0.13 | 3.75  | 0    | 3.29  | 0.04 | 4.18  | 0    | 2.37  | 0.57 | 2.98 | 2 | 0.23 | 0 |
| 717   | 1.73  | 0.17 | 2.19  | 0.05 | 3.08  | 0.05 | 4.15  | 0    | 1.59  | 0.38 | 0.06 | 2 | 0.97 | 0 |
| 7180  | -1.93 | 0.15 | -3.07 | 0.01 | -1.86 | 0.22 | -3.42 | 0    | -1.54 | 0.45 | 2.45 | 2 | 0.29 | 0 |
| 7200  | -2.2  | 0.13 | -3.35 | 0.01 | -3.94 | 0.02 | -5.57 | 0    | -2.36 | 0.42 | 0.53 | 2 | 0.77 | 0 |
| 7299  | -1.87 | 0.15 | -3.17 | 0.01 | -1.96 | 0.2  | -3.4  | 0    | -1.6  | 0.47 | 2.59 | 2 | 0.27 | 0 |
| 7347  | 1.13  | 0.34 | 2.97  | 0.01 | 2.24  | 0.14 | 3.63  | 0    | 1.4   | 0.39 | 1.91 | 2 | 0.38 | 0 |
| 7358  | 2.01  | 0.14 | 2.16  | 0.06 | 1.79  | 0.24 | 3.32  | 0.01 | 1.26  | 0.38 | 0.83 | 2 | 0.66 | 0 |
| 7368  | -1.8  | 0.16 | -2.88 | 0.01 | -2.05 | 0.18 | -3.78 | 0    | -1.47 | 0.39 | 1.45 | 2 | 0.48 | 0 |
| 7412  | 2.88  | 0.1  | 2.83  | 0.02 | 2.29  | 0.13 | 3.4   | 0    | 1.93  | 0.57 | 3.26 | 2 | 0.2  | 0 |
| 7433  | -1.91 | 0.15 | -3.3  | 0.01 | -2.6  | 0.09 | -4.39 | 0    | -1.78 | 0.41 | 2    | 2 | 0.37 | 0 |
| 7444  | 0.92  | 0.48 | 2.41  | 0.03 | 2.02  | 0.19 | 3.13  | 0.01 | 1.17  | 0.37 | 0.92 | 2 | 0.63 | 0 |
| 7453  | 2.36  | 0.12 | 2.58  | 0.02 | 2.26  | 0.14 | 4.01  | 0    | 1.58  | 0.39 | 1.22 | 2 | 0.54 | 0 |
| 7456  | 2.87  | 0.1  | 2.82  | 0.02 | 2.13  | 0.16 | 3.2   | 0.01 | 1.9   | 0.59 | 3.53 | 2 | 0.17 | 0 |
| 7477  | -1.05 | 0.39 | -2.65 | 0.02 | -2.42 | 0.11 | -3.59 | 0    | -1.37 | 0.38 | 1.08 | 2 | 0.58 | 0 |
| 7480  | -1.33 | 0.26 | -2.44 | 0.03 | -2.33 | 0.13 | -3.56 | 0    | -1.35 | 0.38 | 0.43 | 2 | 0.81 | 0 |
| 7482  | -1.37 | 0.24 | -1.17 | 0.3  | -2.72 | 0.08 | -3.14 | 0.01 | -1.15 | 0.37 | 0.8  | 2 | 0.67 | 0 |
| 7625  | -1.1  | 0.35 | -2.69 | 0.02 | -2.75 | 0.08 | -3.87 | 0    | -1.48 | 0.38 | 1.04 | 2 | 0.6  | 0 |
| 7629  | -2.72 | 0.11 | -1.58 | 0.16 | -2.82 | 0.07 | -3.5  | 0    | -1.56 | 0.44 | 2.46 | 2 | 0.29 | 0 |
| 765   | -1.44 | 0.23 | -2.66 | 0.02 | -1.72 | 0.26 | -3.28 | 0.01 | -1.25 | 0.38 | 1.34 | 2 | 0.51 | 0 |
| 7691  | -1.73 | 0.17 | -2.23 | 0.05 | -2.03 | 0.18 | -3.43 | 0    | -1.3  | 0.38 | 0.34 | 2 | 0.84 | 0 |
| 776   | -1.47 | 0.22 | -2.94 | 0.01 | -1.81 | 0.24 | -3.47 | 0    | -1.34 | 0.39 | 2    | 2 | 0.37 | 0 |
| 7791  | 2.39  | 0.12 | 1.78  | 0.11 | 2.71  | 0.08 | 3.9   | 0    | 1.5   | 0.38 | 1.03 | 2 | 0.6  | 0 |
| 783   | -2.13 | 0.14 | -2.64 | 0.02 | -2.49 | 0.1  | -4.14 | 0    | -1.62 | 0.39 | 0.61 | 2 | 0.74 | 0 |
| 79047 | -1.02 | 0.41 | -1.66 | 0.14 | -2.62 | 0.09 | -3.2  | 0.01 | -1.18 | 0.37 | 0.43 | 2 | 0.81 | 0 |
| 79139 | 1.32  | 0.26 | 2.67  | 0.02 | 2.65  | 0.09 | 3.91  | 0    | 1.5   | 0.38 | 0.69 | 2 | 0.71 | 0 |
| 79155 | 0.54  | 0.77 | 2.2   | 0.05 | 2.85  | 0.07 | 3.41  | 0    | 1.27  | 0.37 | 1.6  | 2 | 0.45 | 0 |
| 79169 | -2.09 | 0.14 | -1.42 | 0.21 | -2.14 | 0.16 | -3.18 | 0.01 | -1.19 | 0.37 | 0.85 | 2 | 0.65 | 0 |
| 79616 | -1.78 | 0.16 | -2.71 | 0.02 | -1.55 | 0.32 | -3.33 | 0.01 | -1.28 | 0.38 | 1.85 | 2 | 0.4  | 0 |
| 79628 | -1.49 | 0.21 | -2.9  | 0.01 | -2.42 | 0.11 | -3.92 | 0    | -1.52 | 0.39 | 1.15 | 2 | 0.56 | 0 |
| 79667 | -1.63 | 0.19 | -2.29 | 0.04 | -2.29 | 0.13 | -3.6  | 0    | -1.37 | 0.38 | 0.18 | 2 | 0.92 | 0 |
| 79842 | -1.02 | 0.41 | -1.19 | 0.29 | -3.16 | 0.05 | -3.28 | 0.01 | -1.2  | 0.37 | 1.71 | 2 | 0.43 | 0 |
| 79868 | 2.53  | 0.12 | 2.22  | 0.05 | 1.98  | 0.2  | 3.66  | 0    | 1.43  | 0.39 | 1.87 | 2 | 0.39 | 0 |
| 79874 | -1.79 | 0.16 | -2.27 | 0.04 | -2.55 | 0.1  | -3.84 | 0    | -1.47 | 0.38 | 0.06 | 2 | 0.97 | 0 |
| 79875 | -1.87 | 0.15 | -2.66 | 0.02 | -1.65 | 0.29 | -3.42 | 0    | -1.32 | 0.39 | 1.62 | 2 | 0.44 | 0 |
| 79879 | -0.37 | 0.87 | -2.05 | 0.07 | -2.89 | 0.07 | -3.28 | 0.01 | -1.21 | 0.37 | 1.95 | 2 | 0.38 | 0 |
| 79885 | -2.93 | 0.11 | -3.8  | 0    | -2.8  | 0.07 | -3.15 | 0.01 | -2.79 | 0.89 | 5.66 | 2 | 0.06 | 0 |
| 79943 | -1.52 | 0.21 | -3.36 | 0.01 | -2.4  | 0.12 | -3.43 | 0    | -1.69 | 0.49 | 2.8  | 2 | 0.25 | 0 |
| 79962 | -1.22 | 0.3  | -2.2  | 0.05 | -3.13 | 0.05 | -3.94 | 0    | -1.49 | 0.38 | 0.55 | 2 | 0.76 | 0 |
| 79977 | -1.64 | 0.18 | -1.97 | 0.08 | -1.9  | 0.21 | -3.16 | 0.01 | -1.18 | 0.37 | 0.21 | 2 | 0.9  | 0 |
| 79979 | -2.22 | 0.13 | -2.43 | 0.03 | -3.78 | 0.03 | -4.99 | 0    | -1.99 | 0.4  | 0.22 | 2 | 0.9  | 0 |
| 800   | 1.93  | 0.15 | 3.19  | 0.01 | 1.86  | 0.22 | 3.21  | 0.01 | 1.61  | 0.5  | 2.89 | 2 | 0.24 | 0 |
| 80013 | 1.84  | 0.16 | 1.71  | 0.13 | 2.43  | 0.11 | 3.46  | 0    | 1.29  | 0.37 | 0.21 | 2 | 0.9  | 0 |

|       |       |      |       |      |       |      |       |      |       |      |      |   |      |   |
|-------|-------|------|-------|------|-------|------|-------|------|-------|------|------|---|------|---|
| 80071 | -0.55 | 0.76 | -1.93 | 0.08 | -2.96 | 0.06 | -3.35 | 0.01 | -1.24 | 0.37 | 1.58 | 2 | 0.45 | 0 |
| 80094 | -0.99 | 0.43 | -3.47 | 0.01 | -3.78 | 0.03 | -3.3  | 0.01 | -1.97 | 0.6  | 3.94 | 2 | 0.14 | 0 |
| 80095 | -2.06 | 0.14 | -1.94 | 0.08 | -2.15 | 0.16 | -3.48 | 0    | -1.32 | 0.38 | 0.48 | 2 | 0.79 | 0 |
| 80131 | -1.02 | 0.41 | -2.96 | 0.01 | -2.64 | 0.09 | -3.86 | 0    | -1.5  | 0.39 | 1.87 | 2 | 0.39 | 0 |
| 80219 | 1.39  | 0.24 | 2.69  | 0.02 | 1.99  | 0.19 | 3.46  | 0    | 1.32  | 0.38 | 1.1  | 2 | 0.58 | 0 |
| 8045  | -1.86 | 0.16 | -3    | 0.01 | -1.96 | 0.2  | -3.78 | 0    | -1.49 | 0.39 | 1.99 | 2 | 0.37 | 0 |
| 8076  | 1.39  | 0.24 | 2.29  | 0.04 | 1.91  | 0.21 | 3.23  | 0.01 | 1.21  | 0.37 | 0.45 | 2 | 0.8  | 0 |
| 80833 | 1.76  | 0.17 | 2.37  | 0.04 | 3.03  | 0.06 | 4.23  | 0    | 1.63  | 0.39 | 0.02 | 2 | 0.99 | 0 |
| 8085  | -1.91 | 0.15 | -2.76 | 0.02 | -2.75 | 0.08 | -4.29 | 0    | -1.69 | 0.39 | 0.4  | 2 | 0.82 | 0 |
| 8099  | 2.28  | 0.13 | 2.8   | 0.02 | 2.35  | 0.12 | 4.16  | 0    | 1.66  | 0.4  | 1.26 | 2 | 0.53 | 0 |
| 81029 | -1.01 | 0.41 | -2.3  | 0.04 | -2.17 | 0.15 | -3.23 | 0.01 | -1.21 | 0.37 | 0.58 | 2 | 0.75 | 0 |
| 81542 | 1.89  | 0.15 | 1.61  | 0.15 | 3.06  | 0.06 | 3.86  | 0    | 1.45  | 0.38 | 0.64 | 2 | 0.73 | 0 |
| 81553 | 2.53  | 0.12 | 1.68  | 0.13 | 2.9   | 0.07 | 4     | 0    | 1.55  | 0.39 | 1.57 | 2 | 0.46 | 0 |
| 81606 | 1.13  | 0.34 | 3.05  | 0.01 | 3.11  | 0.05 | 4.29  | 0    | 1.69  | 0.39 | 1.8  | 2 | 0.41 | 0 |
| 81614 | 1.7   | 0.17 | 1.87  | 0.09 | 2.48  | 0.11 | 3.53  | 0    | 1.32  | 0.37 | 0.04 | 2 | 0.98 | 0 |
| 81628 | -1.24 | 0.29 | -1.35 | 0.23 | -3.15 | 0.05 | -3.47 | 0    | -1.28 | 0.37 | 1.24 | 2 | 0.54 | 0 |
| 81693 | -1.57 | 0.2  | -2.51 | 0.03 | -2.05 | 0.18 | -3.51 | 0    | -1.33 | 0.38 | 0.63 | 2 | 0.73 | 0 |
| 818   | -2.72 | 0.11 | -1.48 | 0.19 | -3.34 | 0.04 | -3.45 | 0    | -1.69 | 0.49 | 2.88 | 2 | 0.24 | 0 |
| 81853 | 0.95  | 0.46 | 2.52  | 0.03 | 2.03  | 0.18 | 3.2   | 0.01 | 1.2   | 0.38 | 1.09 | 2 | 0.58 | 0 |
| 81894 | 1.82  | 0.16 | 2.86  | 0.01 | 2.03  | 0.18 | 3.77  | 0    | 1.47  | 0.39 | 1.45 | 2 | 0.48 | 0 |
| 824   | 2.23  | 0.13 | 2.15  | 0.06 | 1.82  | 0.24 | 3.41  | 0    | 1.31  | 0.38 | 1.21 | 2 | 0.55 | 0 |
| 826   | 1.67  | 0.18 | 3.12  | 0.01 | 1.98  | 0.2  | 3.48  | 0    | 1.51  | 0.43 | 2.33 | 2 | 0.31 | 0 |
| 8291  | 1.06  | 0.38 | 2.23  | 0.05 | 3.2   | 0.05 | 3.93  | 0    | 1.48  | 0.38 | 0.89 | 2 | 0.64 | 0 |
| 83447 | -1.99 | 0.14 | -2.77 | 0.02 | -1.8  | 0.24 | -3.62 | 0    | -1.41 | 0.39 | 1.72 | 2 | 0.42 | 0 |
| 83637 | -0.84 | 0.54 | -2.63 | 0.02 | -3.9  | 0.02 | -3.79 | 0    | -1.71 | 0.45 | 2.62 | 2 | 0.27 | 0 |
| 840   | 1.46  | 0.22 | 2.69  | 0.02 | 2.57  | 0.09 | 3.92  | 0    | 1.51  | 0.39 | 0.6  | 2 | 0.74 | 0 |
| 8408  | -2.24 | 0.13 | -1.18 | 0.3  | -2.32 | 0.13 | -3.2  | 0.01 | -1.2  | 0.37 | 1.51 | 2 | 0.47 | 0 |
| 84302 | -2.03 | 0.14 | -3.46 | 0.01 | -2.37 | 0.12 | -3.49 | 0    | -1.89 | 0.54 | 3.1  | 2 | 0.21 | 0 |
| 8471  | -2.82 | 0.1  | -1.61 | 0.15 | -3.21 | 0.05 | -3.44 | 0    | -1.72 | 0.5  | 2.91 | 2 | 0.23 | 0 |
| 84719 | -0.79 | 0.58 | -2.78 | 0.02 | -3.67 | 0.03 | -3.75 | 0    | -1.68 | 0.45 | 2.57 | 2 | 0.28 | 0 |
| 84722 | -1.41 | 0.23 | -2.29 | 0.04 | -2.41 | 0.12 | -3.58 | 0    | -1.35 | 0.38 | 0.18 | 2 | 0.91 | 0 |
| 8492  | -1.71 | 0.17 | -2.98 | 0.01 | -2.12 | 0.16 | -3.82 | 0    | -1.5  | 0.39 | 1.63 | 2 | 0.44 | 0 |
| 8503  | 2.93  | 0.11 | 2.21  | 0.05 | 2.9   | 0.07 | 3.89  | 0    | 1.83  | 0.47 | 2.5  | 2 | 0.29 | 0 |
| 8519  | 1.48  | 0.22 | 3.73  | 0    | 3.94  | 0.02 | 3.76  | 0    | 2.29  | 0.61 | 3.67 | 2 | 0.16 | 0 |
| 8541  | -1.17 | 0.32 | -2.91 | 0.01 | -2.12 | 0.16 | -3.54 | 0    | -1.36 | 0.38 | 1.78 | 2 | 0.41 | 0 |
| 8542  | 1.73  | 0.17 | 2.08  | 0.06 | 2.17  | 0.15 | 3.44  | 0    | 1.3   | 0.38 | 0.15 | 2 | 0.93 | 0 |
| 8565  | 2.45  | 0.12 | 1.98  | 0.08 | 1.99  | 0.19 | 3.51  | 0    | 1.35  | 0.38 | 1.55 | 2 | 0.46 | 0 |
| 857   | 1.39  | 0.24 | 3.18  | 0.01 | 2.62  | 0.09 | 4.12  | 0    | 1.63  | 0.4  | 1.97 | 2 | 0.37 | 0 |
| 858   | 1.57  | 0.2  | 2.6   | 0.02 | 3.39  | 0.04 | 4.51  | 0    | 1.76  | 0.39 | 0.35 | 2 | 0.84 | 0 |
| 8605  | 1.47  | 0.22 | 2.83  | 0.02 | 1.8   | 0.24 | 3.43  | 0    | 1.32  | 0.38 | 1.7  | 2 | 0.43 | 0 |
| 8607  | 1.13  | 0.34 | 2.06  | 0.07 | 2.23  | 0.14 | 3.2   | 0.01 | 1.19  | 0.37 | 0.21 | 2 | 0.9  | 0 |
| 8624  | 0.53  | 0.78 | 1.8   | 0.11 | 3.03  | 0.06 | 3.31  | 0.01 | 1.22  | 0.37 | 1.74 | 2 | 0.42 | 0 |
| 8697  | 1.45  | 0.22 | 2.35  | 0.04 | 1.69  | 0.28 | 3.12  | 0.01 | 1.17  | 0.38 | 0.74 | 2 | 0.69 | 0 |
| 8704  | -2.5  | 0.12 | -2.18 | 0.05 | -2.99 | 0.06 | -4.38 | 0    | -1.72 | 0.39 | 0.81 | 2 | 0.67 | 0 |
| 8743  | 1.99  | 0.14 | 2.87  | 0.01 | 2.73  | 0.08 | 4.36  | 0    | 1.73  | 0.4  | 0.6  | 2 | 0.74 | 0 |
| 8754  | 1.04  | 0.39 | 2.75  | 0.02 | 2.23  | 0.14 | 3.49  | 0    | 1.33  | 0.38 | 1.42 | 2 | 0.49 | 0 |
| 8775  | 0.81  | 0.57 | 2.53  | 0.03 | 2.37  | 0.12 | 3.38  | 0    | 1.27  | 0.38 | 1.26 | 2 | 0.53 | 0 |
| 8795  | 2.41  | 0.12 | 1.29  | 0.25 | 2.76  | 0.08 | 3.63  | 0    | 1.38  | 0.38 | 1.91 | 2 | 0.39 | 0 |
| 8813  | 0.85  | 0.54 | 2.47  | 0.03 | 3.27  | 0.04 | 4     | 0    | 1.52  | 0.38 | 1.56 | 2 | 0.46 | 0 |
| 883   | -1.31 | 0.26 | -2.96 | 0.01 | -2.87 | 0.07 | -4.18 | 0    | -1.63 | 0.39 | 1.24 | 2 | 0.54 | 0 |
| 8910  | 2.38  | 0.12 | 3.23  | 0.01 | 1.96  | 0.2  | 3.21  | 0.01 | 1.84  | 0.57 | 3.4  | 2 | 0.18 | 0 |
| 8934  | 1.83  | 0.16 | 2.89  | 0.01 | 1.91  | 0.21 | 3.69  | 0    | 1.44  | 0.39 | 1.73 | 2 | 0.42 | 0 |
| 894   | 2.55  | 0.12 | 1.85  | 0.1  | 2.27  | 0.14 | 3.67  | 0    | 1.41  | 0.39 | 1.66 | 2 | 0.44 | 0 |
| 90    | 0.99  | 0.43 | 2.84  | 0.02 | 2.55  | 0.1  | 3.74  | 0    | 1.43  | 0.38 | 1.6  | 2 | 0.45 | 0 |
| 9013  | -0.96 | 0.45 | -1.97 | 0.08 | -2.56 | 0.1  | -3.3  | 0.01 | -1.22 | 0.37 | 0.44 | 2 | 0.8  | 0 |
| 902   | 0.84  | 0.54 | 1.95  | 0.08 | 2.9   | 0.07 | 3.46  | 0    | 1.28  | 0.37 | 0.93 | 2 | 0.63 | 0 |
| 9039  | 0.98  | 0.44 | 3.27  | 0.01 | 2.98  | 0.06 | 3.35  | 0.01 | 1.68  | 0.5  | 2.98 | 2 | 0.23 | 0 |
| 9056  | 2.95  | 0.11 | 2.2   | 0.05 | 2.87  | 0.07 | 3.76  | 0    | 1.83  | 0.49 | 2.64 | 2 | 0.27 | 0 |
| 909   | -2.71 | 0.11 | -3.04 | 0.01 | -2.57 | 0.09 | -4.19 | 0    | -1.95 | 0.46 | 2.35 | 2 | 0.31 | 0 |
| 910   | -1.65 | 0.18 | -3.57 | 0.01 | -2.92 | 0.07 | -3.65 | 0    | -1.96 | 0.54 | 3.06 | 2 | 0.22 | 0 |
| 9111  | 2.69  | 0.11 | 3.43  | 0.01 | 2.44  | 0.11 | 3.43  | 0    | 2.21  | 0.64 | 3.78 | 2 | 0.15 | 0 |
| 913   | -1.24 | 0.29 | -1.35 | 0.23 | -3.43 | 0.04 | -3.65 | 0    | -1.35 | 0.37 | 1.77 | 2 | 0.41 | 0 |
| 9145  | -1.74 | 0.17 | -1.59 | 0.16 | -2.88 | 0.07 | -3.66 | 0    | -1.37 | 0.37 | 0.43 | 2 | 0.8  | 0 |
| 9153  | -1.27 | 0.28 | -2.72 | 0.02 | -2.27 | 0.14 | -3.62 | 0    | -1.38 | 0.38 | 1.02 | 2 | 0.6  | 0 |
| 91543 | 1.3   | 0.27 | 2.08  | 0.06 | 3.65  | 0.03 | 4.27  | 0    | 1.62  | 0.38 | 1.13 | 2 | 0.57 | 0 |
| 9168  | 2.64  | 0.11 | 3.63  | 0.01 | 3.66  | 0.03 | 5.63  | 0    | 2.48  | 0.44 | 1.81 | 2 | 0.4  | 0 |
| 9247  | -1.91 | 0.15 | -2.47 | 0.03 | -1.95 | 0.2  | -3.56 | 0    | -1.37 | 0.38 | 0.83 | 2 | 0.66 | 0 |
| 9276  | 1.47  | 0.22 | 2.61  | 0.02 | 1.8   | 0.24 | 3.33  | 0.01 | 1.27  | 0.38 | 1.12 | 2 | 0.57 | 0 |
| 93210 | -0.62 | 0.71 | -2.39 | 0.03 | -3.39 | 0.04 | -3.64 | 0    | -1.47 | 0.4  | 2.24 | 2 | 0.33 | 0 |
| 9332  | 2.77  | 0.1  | 2.94  | 0.01 | 2.96  | 0.06 | 4.84  | 0    | 2.01  | 0.41 | 1.69 | 2 | 0.43 | 0 |
| 9340  | -1.42 | 0.23 | -2.78 | 0.02 | -1.52 | 0.33 | -3.18 | 0.01 | -1.21 | 0.38 | 1.99 | 2 | 0.37 | 0 |



|      |       |      |       |      |       |      |       |      |       |      |      |   |      |   |
|------|-------|------|-------|------|-------|------|-------|------|-------|------|------|---|------|---|
| 9366 | -1.57 | 0.2  | -2.75 | 0.02 | -1.75 | 0.25 | -3.4  | 0    | -1.31 | 0.38 | 1.52 | 2 | 0.47 | 0 |
| 9367 | 2.03  | 0.14 | 3.23  | 0.01 | 2.24  | 0.14 | 3.84  | 0    | 1.72  | 0.45 | 2.33 | 2 | 0.31 | 0 |
| 9369 | -0.93 | 0.47 | -3.03 | 0.01 | -3.83 | 0.02 | -3.83 | 0    | -1.83 | 0.48 | 2.78 | 2 | 0.25 | 0 |
| 9372 | -0.8  | 0.57 | -3.02 | 0.01 | -3.39 | 0.04 | -3.56 | 0    | -1.67 | 0.47 | 2.73 | 2 | 0.26 | 0 |
| 9403 | 1.53  | 0.21 | 2.56  | 0.02 | 3.49  | 0.03 | 4.54  | 0    | 1.77  | 0.39 | 0.45 | 2 | 0.8  | 0 |
| 9410 | 1.11  | 0.35 | 2.38  | 0.04 | 2.62  | 0.09 | 3.63  | 0    | 1.37  | 0.38 | 0.54 | 2 | 0.76 | 0 |
| 9445 | 1.41  | 0.24 | 3.17  | 0.01 | 2.87  | 0.07 | 4.31  | 0    | 1.71  | 0.4  | 1.72 | 2 | 0.42 | 0 |
| 9446 | 2.3   | 0.12 | 3.33  | 0.01 | 2.58  | 0.09 | 4.25  | 0    | 1.92  | 0.45 | 2.27 | 2 | 0.32 | 0 |
| 9473 | 1.93  | 0.15 | 2.65  | 0.02 | 2.79  | 0.08 | 4.27  | 0    | 1.67  | 0.39 | 0.23 | 2 | 0.89 | 0 |
| 9474 | 0.73  | 0.62 | 2.31  | 0.04 | 2.73  | 0.08 | 3.49  | 0    | 1.31  | 0.37 | 1.17 | 2 | 0.56 | 0 |
| 9510 | 2.21  | 0.13 | 1.03  | 0.36 | 3.43  | 0.04 | 3.18  | 0.01 | 1.47  | 0.46 | 2.82 | 2 | 0.24 | 0 |
| 9532 | 0.83  | 0.55 | 2.65  | 0.02 | 2.36  | 0.12 | 3.44  | 0    | 1.3   | 0.38 | 1.47 | 2 | 0.48 | 0 |
| 9535 | 2.51  | 0.12 | 3.13  | 0.01 | 2.5   | 0.1  | 4.34  | 0    | 1.87  | 0.43 | 2.14 | 2 | 0.34 | 0 |
| 9541 | 2     | 0.14 | 2.67  | 0.02 | 3.24  | 0.05 | 4.64  | 0    | 1.84  | 0.4  | 0.05 | 2 | 0.98 | 0 |
| 9542 | -1.85 | 0.16 | -1.19 | 0.29 | -2.72 | 0.08 | -3.36 | 0.01 | -1.24 | 0.37 | 0.99 | 2 | 0.61 | 0 |
| 9597 | -1.82 | 0.16 | -3.16 | 0.01 | -2.82 | 0.07 | -4.48 | 0    | -1.8  | 0.4  | 1.25 | 2 | 0.54 | 0 |
| 9648 | 1.61  | 0.19 | 2.63  | 0.02 | 1.85  | 0.23 | 3.44  | 0    | 1.31  | 0.38 | 1.1  | 2 | 0.58 | 0 |
| 9651 | -1.53 | 0.21 | -0.97 | 0.4  | -2.78 | 0.08 | -3.12 | 0.01 | -1.14 | 0.37 | 1.25 | 2 | 0.53 | 0 |
| 9672 | 2.07  | 0.14 | 1.89  | 0.09 | 2.09  | 0.17 | 3.42  | 0    | 1.29  | 0.38 | 0.55 | 2 | 0.76 | 0 |
| 9687 | -1.84 | 0.16 | -2.69 | 0.02 | -1.72 | 0.26 | -3.47 | 0    | -1.34 | 0.39 | 1.53 | 2 | 0.47 | 0 |
| 9688 | 2.1   | 0.14 | 2.75  | 0.02 | 1.74  | 0.26 | 3.62  | 0    | 1.41  | 0.39 | 1.93 | 2 | 0.38 | 0 |
| 9757 | -1.14 | 0.34 | -2.19 | 0.05 | -2.03 | 0.18 | -3.14 | 0.01 | -1.17 | 0.37 | 0.37 | 2 | 0.83 | 0 |
| 9796 | -1.5  | 0.21 | -2.27 | 0.04 | -2.37 | 0.12 | -3.59 | 0    | -1.35 | 0.38 | 0.14 | 2 | 0.93 | 0 |
| 9825 | -2.37 | 0.12 | -2.95 | 0.01 | -3.85 | 0.02 | -5.4  | 0    | -2.23 | 0.41 | 0.03 | 2 | 0.98 | 0 |
| 9836 | -1.56 | 0.2  | -1.13 | 0.32 | -2.62 | 0.09 | -3.13 | 0.01 | -1.15 | 0.37 | 0.78 | 2 | 0.68 | 0 |
| 9839 | 1.67  | 0.18 | 2.29  | 0.04 | 1.87  | 0.22 | 3.32  | 0.01 | 1.25  | 0.38 | 0.52 | 2 | 0.77 | 0 |
| 9848 | -2.16 | 0.13 | -2.41 | 0.03 | -1.69 | 0.27 | -3.44 | 0    | -1.32 | 0.39 | 1.49 | 2 | 0.47 | 0 |
| 9901 | -1.08 | 0.37 | -2.13 | 0.06 | -2.64 | 0.09 | -3.5  | 0    | -1.31 | 0.37 | 0.4  | 2 | 0.82 | 0 |
| 9905 | -1.02 | 0.4  | -1.32 | 0.24 | -3.2  | 0.05 | -3.38 | 0    | -1.24 | 0.37 | 1.58 | 2 | 0.45 | 0 |
| 9914 | -1.3  | 0.27 | -3.2  | 0.01 | -2.18 | 0.15 | -3.27 | 0.01 | -1.51 | 0.46 | 2.61 | 2 | 0.27 | 0 |
| 9915 | -2.62 | 0.11 | -2.58 | 0.02 | -3.95 | 0.02 | -5.35 | 0    | -2.2  | 0.41 | 0.52 | 2 | 0.77 | 0 |
| 9925 | -0.67 | 0.67 | -1.74 | 0.12 | -2.72 | 0.08 | -3.14 | 0.01 | -1.15 | 0.37 | 1    | 2 | 0.61 | 0 |
| 994  | 1.27  | 0.28 | 1.69  | 0.13 | 2.54  | 0.1  | 3.28  | 0.01 | 1.21  | 0.37 | 0.17 | 2 | 0.92 | 0 |
| 9980 | -1.7  | 0.17 | -2.25 | 0.05 | -2.57 | 0.09 | -3.81 | 0    | -1.45 | 0.38 | 0.04 | 2 | 0.98 | 0 |
