# Supplementary material for: Meta-Analysis of Polymyositis and Dermatomyositis Microarray Data Reveals Novel Genetic Biomarkers
Source: MDPI journal article supplement (doi:10.3390/genes10110864), 2019-10-30
Supplement: s1 [file s1]

**Supplementary Table 4.** Detected SNPs and eGenes in sun-exposed skin tissue.

| gene             | SNP                    | GTEX_p_value | p_value    | rs_id_dbSNP142_GRC37p13 | external_gene_name | description                                                                                                                 |
|------------------|------------------------|--------------|------------|-------------------------|--------------------|-----------------------------------------------------------------------------------------------------------------------------|
| ENSG00000235725  | 2,65836286_A_G_b37     | 6.86E-09     | 9.00E-06   | rs17030469              | AC007389.3         |                                                                                                                             |
| ENSG00000235725  | 2,65835876_A_G_b37     | 2.01E-09     | 1.20E-05   | rs17030462              | AC007389.3         |                                                                                                                             |
| ENSG000000087076 | 19,49381273_TCC_T_b37  | 9.41E-10     | 1.20E-05   | r20212179796            | HS017814           | hydroxysteroid (17-beta) dehydrogenase 14 [Source:HGNC Symbol;Acc:23238]                                                    |
| ENSG00000105559  | 19,49381273_TCC_T_b37  | 5.19E-05     | 1.20E-05   | r20212179796            | PLEKH44            | pleckstrin homology domain containing, family A (phosphoinositide binding specific) member 4 [Source:HGNC Symbol;Acc:14339] |
| ENSG00000235725  | 2,65844734_T_C_b37     | 2.98E-10     | 1.60E-05   | rs16760517              | AC007389.3         |                                                                                                                             |
| ENSG00000120539  | 10,27275804_T_C_b37    | 9.44E-05     | 3.50E-05   | rs149490734             | MASTL              | microtubule associated serine/threonine kinase-like [Source:HGNC Symbol;Acc:19042]                                          |
| ENSG00000120539  | 10,27271427_T_C_b37    | 9.44E-05     | 5.10E-05   | rs78379439              | MASTL              | microtubule associated serine/threonine kinase-like [Source:HGNC Symbol;Acc:19042]                                          |
| ENSG00000131042  | 19,54791788_A_G_b37    | 5.47E-07     | 6.20E-05   | rs397600                | LILRB2             | leukocyte immunoglobulin-like receptor, subfamily B (with TM and ITIM domains), member 2 [Source:HGNC Symbol;Acc:6606]      |
| ENSG00000111554  | 12,68736461_C_A_b37    | 6.31E-06     | 7.00E-05   | rs117565525             | MDM1               | Mdm1 nuclear protein homolog (mouse) [Source:HGNC Symbol;Acc:29917]                                                         |
| ENSG00000155542  | 5,56215203_G_A_b37     | 3.87E-14     | 8.00E-05   | r80310300               | SETD9              | SET domain containing 9 [Source:HGNC Symbol;Acc:28508]                                                                      |
| ENSG00000155542  | 5,56256606_G_A_b37     | 1.53E-14     | 1.00E-04   | rs79683734              | SETD9              | SET domain containing 9 [Source:HGNC Symbol;Acc:28508]                                                                      |
| ENSG00000108264  | 17,35766475_A_G_b37    | 1.54E-25     | 1.00E-04   | rs72828246              | TADA2A             | transcriptional adaptor 2A [Source:HGNC Symbol;Acc:11531]                                                                   |
| ENSG00000006114  | 17,35766475_A_G_b37    | 4.48E-21     | 1.00E-04   | rs72828246              | SYNRG              | synergin, gamma [Source:HGNC Symbol;Acc:557]                                                                                |
| ENSG00000155542  | 5,56258685_G_GAT_b37   | 1.52E-14     | 0.00019999 | rs77039815              | SETD9              | SET domain containing 9 [Source:HGNC Symbol;Acc:28508]                                                                      |
| ENSG00000182853  | 17,4659152_C_T_b37     | 1.21E-06     | 0.00019999 | rs12946532              | VMO1               | vitelline membrane outer layer 1 homolog (chicken) [Source:HGNC Symbol;Acc:30387]                                           |
| ENSG00000108264  | 17,35780056_C_T_b37    | 1.41E-24     | 0.00019999 | rs11212173              | TADA2A             | transcriptional adaptor 2A [Source:HGNC Symbol;Acc:11531]                                                                   |
| ENSG00000108264  | 17,35782107_G_C_b37    | 6.13E-26     | 0.00019999 | r878520                 | TADA2A             | transcriptional adaptor 2A [Source:HGNC Symbol;Acc:11531]                                                                   |
| ENSG00000006114  | 17,35780056_C_T_b37    | 5.17E-21     | 0.00019999 | rs11212173              | SYNRG              | synergin, gamma [Source:HGNC Symbol;Acc:557]                                                                                |
| ENSG00000006114  | 17,35782107_G_C_b37    | 5.76E-20     | 0.00019999 | r878520                 | SYNRG              | synergin, gamma [Source:HGNC Symbol;Acc:557]                                                                                |
| ENSG000000087076 | 19,49380865_G_A_b37    | 2.20E-09     | 0.00019999 | rs16983                 | HS017814           | hydroxysteroid (17-beta) dehydrogenase 14 [Source:HGNC Symbol;Acc:23238]                                                    |
| ENSG00000105559  | 19,49380865_G_A_b37    | 3.08E-06     | 0.00019999 | rs16983                 | PLEKH44            | pleckstrin homology domain containing, family A (phosphoinositide binding specific) member 4 [Source:HGNC Symbol;Acc:14339] |
| ENSG00000108264  | 17,35755546_G_G_b37    | 2.16E-25     | 0.00012999 | rs113593735             | TADA2A             | transcriptional adaptor 2A [Source:HGNC Symbol;Acc:11531]                                                                   |
| ENSG00000006114  | 17,35755546_G_G_b37    | 4.25E-21     | 0.00012999 | rs113593735             | SYNRG              | synergin, gamma [Source:HGNC Symbol;Acc:557]                                                                                |
| ENSG00000111554  | 12,68649851_C_T_b37    | 5.91E-05     | 0.00013999 | rs140421991             | MDM1               | Mdm1 nuclear protein homolog (mouse) [Source:HGNC Symbol;Acc:29917]                                                         |
| ENSG00000108264  | 17,35759965_A_T_b37    | 1.84E-25     | 0.00013999 | rs11212174              | TADA2A             | transcriptional adaptor 2A [Source:HGNC Symbol;Acc:11531]                                                                   |
| ENSG00000006114  | 17,35759965_A_T_b37    | 4.26E-21     | 0.00013999 | rs11212174              | SYNRG              | synergin, gamma [Source:HGNC Symbol;Acc:557]                                                                                |
| ENSG00000182853  | 17,4659688_C_T_b37     | 1.82E-06     | 0.00014999 | rs4572467               | VMO1               | vitelline membrane outer layer 1 homolog (chicken) [Source:HGNC Symbol;Acc:30387]                                           |
| ENSG00000209236  | 14,23322613_C_T_b37    | 1.16E-07     | 0.00015999 | rs4982695               | HAUS4              | HAUS augmin-like complex, subunit 4 [Source:HGNC Symbol;Acc:20163]                                                          |
| ENSG00000108264  | 17,35786563_C_A_b37    | 4.53E-25     | 0.00015999 | rs564400766             | TADA2A             | transcriptional adaptor 2A [Source:HGNC Symbol;Acc:11531]                                                                   |
| ENSG00000006114  | 17,35786563_C_A_b37    | 3.19E-20     | 0.00015999 | rs564400766             | SYNRG              | synergin, gamma [Source:HGNC Symbol;Acc:557]                                                                                |
| ENSG00000269973  | 2,9960648_C_T_b37      | 6.75E-06     | 0.00016999 | rs78272618              | RP11-950D1.7       |                                                                                                                             |
| ENSG00000235725  | 2,65825974_TA_T_b37    | 4.70E-07     | 0.00016999 | rs5831762               | AC007389.3         |                                                                                                                             |
| ENSG00000093183  | 3,42580706_G_A_b37     | 2.45E-05     | 0.00016999 | rs342508                | SEC22C             | SEC22 vesicle trafficking protein homolog C (S. cerevisiae) [Source:HGNC Symbol;Acc:16828]                                  |
| ENSG00000114857  | 3,42580706_G_A_b37     | 2.15E-05     | 0.00016999 | rs342508                | NKTR               | natural killer-tumor recognition sequence [Source:HGNC Symbol;Acc:7833]                                                     |
| ENSG00000093183  | 3,42586704_C_A_b37     | 3.41E-05     | 0.00017999 | rs6799021               | SEC22C             | SEC22 vesicle trafficking protein homolog C (S. cerevisiae) [Source:HGNC Symbol;Acc:16828]                                  |
| ENSG00000108264  | 17,35791505_A_C_b37    | 5.42E-25     | 0.00017999 | rs853225                | TADA2A             | transcriptional adaptor 2A [Source:HGNC Symbol;Acc:11531]                                                                   |
| ENSG00000108264  | 17,35800919_A_G_b37    | 5.23E-25     | 0.00017999 | rs853229                | TADA2A             | transcriptional adaptor 2A [Source:HGNC Symbol;Acc:11531]                                                                   |
| ENSG00000006114  | 17,35791505_A_C_b37    | 1.07E-22     | 0.00017999 | rs853225                | SYNRG              | synergin, gamma [Source:HGNC Symbol;Acc:557]                                                                                |
| ENSG00000006114  | 17,35800919_A_G_b37    | 1.05E-22     | 0.00017999 | rs853229                | SYNRG              | synergin, gamma [Source:HGNC Symbol;Acc:557]                                                                                |
| ENSG00000235725  | 2,65823020_A_G_b37     | 2.02E-07     | 0.00018999 | rs11695927              | AC007389.3         |                                                                                                                             |
| ENSG00000182853  | 17,4673609_T_C_b37     | 3.78E-07     | 0.00018999 | rs6099974               | VMO1               | vitelline membrane outer layer 1 homolog (chicken) [Source:HGNC Symbol;Acc:30387]                                           |
| ENSG00000108264  | 17,35783812_A_G_b37    | 5.35E-25     | 0.00018999 | rs75015983              | TADA2A             | transcriptional adaptor 2A [Source:HGNC Symbol;Acc:11531]                                                                   |
| ENSG00000108264  | 17,35793286_G_C_b37    | 5.75E-25     | 0.00018999 | rs860468                | TADA2A             | transcriptional adaptor 2A [Source:HGNC Symbol;Acc:11531]                                                                   |
| ENSG00000006114  | 17,35783812_A_G_b37    | 1.09E-22     | 0.00018999 | rs75015983              | SYNRG              | synergin, gamma [Source:HGNC Symbol;Acc:557]                                                                                |
| ENSG00000006114  | 17,35793286_G_C_b37    | 1.46E-22     | 0.00018999 | rs860468                | SYNRG              | synergin, gamma [Source:HGNC Symbol;Acc:557]                                                                                |
| ENSG00000235725  | 2,65813030_G_C_b37     | 3.64E-11     | 0.00019999 | rs7607271               | AC007389.3         |                                                                                                                             |
| ENSG00000235725  | 2,65819883_C_A_b37     | 1.31E-13     | 0.00019999 | rs1115848               | AC007389.3         |                                                                                                                             |
| ENSG00000108264  | 17,35768827_T_A_b37    | 5.19E-25     | 0.00019999 | rs56186148              | TADA2A             | transcriptional adaptor 2A [Source:HGNC Symbol;Acc:11531]                                                                   |
| ENSG00000006114  | 17,35768827_T_A_b37    | 1.07E-22     | 0.00019999 | rs56186148              | SYNRG              | synergin, gamma [Source:HGNC Symbol;Acc:557]                                                                                |
| ENSG000000087076 | 19,49396623_C_T_b37    | 2.15E-06     | 0.00019999 | rs112370206             | HS017814           | hydroxysteroid (17-beta) dehydrogenase 14 [Source:HGNC Symbol;Acc:23238]                                                    |
| ENSG00000235725  | 2,65824380_C_G_b37     | 1.31E-13     | 0.00020999 | rs12614575              | AC007389.3         |                                                                                                                             |
| ENSG00000182853  | 17,4668491_G_A_b37     | 1.85E-07     | 0.00020999 | rs35473600              | VMO1               | vitelline membrane outer layer 1 homolog (chicken) [Source:HGNC Symbol;Acc:30387]                                           |
| ENSG00000182853  | 17,4673609_T_C_b37     | 3.63E-08     | 0.00020999 | rs9890797               | VMO1               | vitelline membrane outer layer 1 homolog (chicken) [Source:HGNC Symbol;Acc:30387]                                           |
| ENSG00000182853  | 17,46742420_G_A_b37    | 3.37E-08     | 0.00020999 | rs2089483               | VMO1               | vitelline membrane outer layer 1 homolog (chicken) [Source:HGNC Symbol;Acc:30387]                                           |
| ENSG00000108264  | 17,35842517_A_G_b37    | 6.40E-23     | 0.00020999 | rs853233                | TADA2A             | transcriptional adaptor 2A [Source:HGNC Symbol;Acc:11531]                                                                   |
| ENSG00000006114  | 17,35842517_A_G_b37    | 4.87E-23     | 0.00020999 | rs853233                | SYNRG              | synergin, gamma [Source:HGNC Symbol;Acc:557]                                                                                |
| ENSG00000261349  | 1,25535823_C_T_b37     | 4.54E-07     | 0.00021999 | rs4649079               | RP3-465N24.5       |                                                                                                                             |
| ENSG00000187010  | 1,25535823_C_T_b37     | 9.62E-06     | 0.00021999 | rs4649079               | RHD                | Rh blood group, D antigen [Source:HGNC Symbol;Acc:10009]                                                                    |
| ENSG00000235725  | 2,65824325_C_G_b37     | 1.31E-13     | 0.00021999 | rs12614551              | AC007389.3         |                                                                                                                             |
| ENSG00000182853  | 17,4685228_G_A_b37     | 4.20E-09     | 0.00021999 | rs34460487              | VMO1               | vitelline membrane outer layer 1 homolog (chicken) [Source:HGNC Symbol;Acc:30387]                                           |
| ENSG00000108264  | 17,35809215_T_C_b37    | 5.05E-25     | 0.00021999 | rs2522964               | TADA2A             | transcriptional adaptor 2A [Source:HGNC Symbol;Acc:11531]                                                                   |
| ENSG00000108264  | 17,35844422_A_C_b37    | 2.31E-24     | 0.00021999 | rs2680721               | TADA2A             | transcriptional adaptor 2A [Source:HGNC Symbol;Acc:11531]                                                                   |
| ENSG00000006114  | 17,35809215_T_C_b37    | 1.16E-22     | 0.00021999 | rs2522964               | SYNRG              | synergin, gamma [Source:HGNC Symbol;Acc:557]                                                                                |
| ENSG00000006114  | 17,35844422_A_C_b37    | 4.41E-23     | 0.00021999 | rs2680721               | SYNRG              | synergin, gamma [Source:HGNC Symbol;Acc:557]                                                                                |
| ENSG000000087076 | 19,49380836_G_C_b37    | 1.85E-10     | 0.00021999 | rs661186                | HS017814           | hydroxysteroid (17-beta) dehydrogenase 14 [Source:HGNC Symbol;Acc:23238]                                                    |
| ENSG00000105559  | 19,49380836_G_C_b37    | 2.45E-05     | 0.00021999 | rs661186                | PLEKH44            | pleckstrin homology domain containing, family A (phosphoinositide binding specific) member 4 [Source:HGNC Symbol;Acc:14339] |
| ENSG00000108264  | 17,35799889_G_C_b37    | 5.54E-25     | 0.00022999 | rs853228                | TADA2A             | transcriptional adaptor 2A [Source:HGNC Symbol;Acc:11531]                                                                   |
| ENSG00000108264  | 17,35823995_C_T_b37    | 2.92E-24     | 0.00022999 | rs864083                | TADA2A             | transcriptional adaptor 2A [Source:HGNC Symbol;Acc:11531]                                                                   |
| ENSG00000108264  | 17,35828164_C_T_b37    | 2.10E-23     | 0.00022999 | rs853211                | TADA2A             | transcriptional adaptor 2A [Source:HGNC Symbol;Acc:11531]                                                                   |
| ENSG00000006114  | 17,35799889_G_T_b37    | 1.06E-22     | 0.00022999 | rs853228                | SYNRG              | synergin, gamma [Source:HGNC Symbol;Acc:557]                                                                                |
| ENSG00000006114  | 17,35823995_C_T_b37    | 2.87E-22     | 0.00022999 | rs864083                | SYNRG              | synergin, gamma [Source:HGNC Symbol;Acc:557]                                                                                |
| ENSG00000006114  | 17,35828164_C_T_b37    | 2.50E-22     | 0.00022999 | rs853211                | SYNRG              | synergin, gamma [Source:HGNC Symbol;Acc:557]                                                                                |
| ENSG00000165914  | 14,91230469_G_GTA_b37  | 1.43E-07     | 0.00023999 | rs201745532             | TC1C7              | tetratricopeptide repeat domain 78 [Source:HGNC Symbol;Acc:19858]                                                           |
| ENSG00000108264  | 17,35787666_C_T_b37    | 5.38E-25     | 0.00023999 | rs853220                | TADA2A             | transcriptional adaptor 2A [Source:HGNC Symbol;Acc:11531]                                                                   |
| ENSG00000108264  | 17,35807445_G_C_b37    | 1.49E-24     | 0.00023999 | rs853203                | TADA2A             | transcriptional adaptor 2A [Source:HGNC Symbol;Acc:11531]                                                                   |
| ENSG00000006114  | 17,35787666_C_T_b37    | 1.08E-22     | 0.00023999 | rs853220                | SYNRG              | synergin, gamma [Source:HGNC Symbol;Acc:557]                                                                                |
| ENSG00000006114  | 17,35807445_G_C_b37    | 6.62E-23     | 0.00023999 | rs853203                | SYNRG              | synergin, gamma [Source:HGNC Symbol;Acc:557]                                                                                |
| ENSG00000204305  | 6,32539473_C_A_b37     | 3.77E-06     | 0.00024999 | rs9269294               | AGER               | advanced glycosylation end product specific receptor [Source:HGNC Symbol;Acc:320]                                           |
| ENSG00000204301  | 6,32539473_C_A_b37     | 4.12E-06     | 0.00024999 | rs9269294               | NOTCH4             | notch 4 [Source:HGNC Symbol;Acc:7884]                                                                                       |
| ENSG00000198502  | 6,32539473_C_A_b37     | 2.57E-16     | 0.00024999 | rs9269294               | HLA-DRB5           | major histocompatibility complex, class II, DR beta 5 [Source:HGNC Symbol;Acc:4953]                                         |
| ENSG00000196126  | 6,32539473_C_A_b37     | 1.54E-22     | 0.00024999 | rs9269294               | HLA-DRB1           | major histocompatibility complex, class II, DR beta 1 [Source:HGNC Symbol;Acc:4948]                                         |
| ENSG00000196735  | 6,32539473_C_A_b37     | 4.13E-14     | 0.00024999 | rs9269294               | HLA-DQA1           | major histocompatibility complex, class II, DQ alpha 1 [Source:HGNC Symbol;Acc:4942]                                        |
| ENSG00000223534  | 6,32539473_C_A_b37     | 3.53E-11     | 0.00024999 | rs9269294               | HLA-DQB1-AS1       | HLA-DQB1 antisense RNA 1 [Source:HGNC Symbol;Acc:39762]                                                                     |
| ENSG00000241287  | 6,32539473_C_A_b37     | 4.83E-06     | 0.00024999 | rs9269294               | XXba-8PG254F23.6   |                                                                                                                             |
| ENSG00000179344  | 6,32539473_C_A_b37     | 1.35E-12     | 0.00024999 | rs9269294               | HLA-DQB1           | major histocompatibility complex, class II, DQ beta 1 [Source:HGNC Symbol;Acc:4944]                                         |
| ENSG00000108264  | 17,35783416_A_G_b37    | 5.35E-25     | 0.00024999 | rs72828253              | TADA2A             | transcriptional adaptor 2A [Source:HGNC Symbol;Acc:11531]                                                                   |
| ENSG00000108264  | 17,35833481_A_T_b37    | 3.25E-24     | 0.00024999 | rs1859191               | TADA2A             | transcriptional adaptor 2A [Source:HGNC Symbol;Acc:11531]                                                                   |
| ENSG00000006114  | 17,35783416_A_G_b37    | 1.09E-22     | 0.00024999 | rs72828253              | SYNRG              | synergin, gamma [Source:HGNC Symbol;Acc:557]                                                                                |
| ENSG00000006114  | 17,35833481_A_T_b37    | 2.10E-22     | 0.00024999 | rs1859191               | SYNRG              | synergin, gamma [Source:HGNC Symbol;Acc:557]                                                                                |
| ENSG00000108264  | 17,35817105_A_G_b37    | 3.34E-24     | 0.00026997 | rs4795200               | TADA2A             | transcriptional adaptor 2A [Source:HGNC Symbol;Acc:11531]                                                                   |
| ENSG00000108264  | 17,35843050_C_T_b37    | 2.65E-24     | 0.00026997 | rs853234                | TADA2A             | transcriptional adaptor 2A [Source:HGNC Symbol;Acc:11531]                                                                   |
| ENSG00000108264  | 17,35874936_A_G_b37    | 5.82E-24     | 0.00026997 | rs1063215               | TADA2A             | transcriptional adaptor 2A [Source:HGNC Symbol;Acc:11531]                                                                   |
| ENSG00000006114  | 17,35817105_A_G_b37    | 2.24E-22     | 0.00026997 | rs4795200               | SYNRG              | synergin, gamma [Source:HGNC Symbol;Acc:557]                                                                                |
| ENSG00000006114  | 17,35843050_C_T_b37    | 9.41E-23     | 0.00026997 | rs853234                | SYNRG              | synergin, gamma [Source:HGNC Symbol;Acc:557]                                                                                |
| ENSG00000006114  | 17,35874936_A_G_b37    | 2.33E-25     | 0.00026997 | rs1063215               | SYNRG              | synergin, gamma [Source:HGNC Symbol;Acc:557]                                                                                |
| ENSG00000155542  | 5,56270111_C_T_b37     | 5.74E-13     | 0.00027997 | rs76813406              | SETD9              | SET domain containing 9 [Source:HGNC Symbol;Acc:28508]                                                                      |
| ENSG00000108264  | 17,35828972_T_C_b37    | 3.27E-24     | 0.00027997 | rs4795203               | TADA2A             | transcriptional adaptor 2A [Source:HGNC Symbol;Acc:11531]                                                                   |
| ENSG00000108264  | 17,35849342_A_C_b37    | 4.56E-24     | 0.00027997 | rs853198                | TADA2A             | transcriptional adaptor 2A [Source:HGNC Symbol;Acc:11531]                                                                   |
| ENSG00000006114  | 17,35828972_T_C_b37    | 2.13E-22     | 0.00027997 | rs4795203               | SYNRG              | synergin, gamma [Source:HGNC Symbol;Acc:557]                                                                                |
| ENSG00000006114  | 17,35849342_A_C_b37    | 1.02E-23     | 0.00027997 | rs853198                | SYNRG              | synergin, gamma [Source:HGNC Symbol;Acc:557]                                                                                |
| ENSG000000087076 | 19,49381268_TTCT_T_b37 | 1.48E-10     | 0.00027997 | rs66808476              | HS017814           | hydroxysteroid (17-beta) dehydrogenase 14 [Source:HGNC Symbol;Acc:23238]                                                    |
| ENSG000000087076 | 19,49381268_TTCT_T_b37 | 1.85E-10     | 0.00027997 | rs7251410               | HS017814           | hydroxysteroid (17-beta) dehydrogenase 14 [Source:HGNC Symbol;Acc:23238]                                                    |
| ENSG00000105559  | 19,49381268_TTCT_T_b37 | 3.74E-05     | 0.00027997 | rs66808476              | PLEKH44            | pleckstrin homology domain containing, family A (phosphoinositide binding specific) member 4 [Source:HGNC Symbol;Acc:14339] |
| ENSG00000105559  | 19,49381268_TT         |              |            |                         |                    |                                                                                                                             |

|                  |                         |          |             |           |              |                                                                                                                             |
|------------------|-------------------------|----------|-------------|-----------|--------------|-----------------------------------------------------------------------------------------------------------------------------|
| ENSG00000108264  | 17_35826456_C_A_b37     | 3.28E-24 | 0.000339997 | r853208   | TADA2A       | transcriptional adaptor 2A [Source:HGNC Symbol;Acc:11531]                                                                   |
| ENSG00000108264  | 17_35839021_C_T_b37     | 3.23E-24 | 0.000339997 | r2522972  | TADA2A       | transcriptional adaptor 2A [Source:HGNC Symbol;Acc:11531]                                                                   |
| ENSG00000108264  | 17_35860964_T_C_b37     | 3.12E-23 | 0.000339997 | r853214   | TADA2A       | transcriptional adaptor 2A [Source:HGNC Symbol;Acc:11531]                                                                   |
| ENSG00000108264  | 17_35866325_A_C_b37     | 2.49E-23 | 0.000339997 | r11653332 | TADA2A       | transcriptional adaptor 2A [Source:HGNC Symbol;Acc:11531]                                                                   |
| ENSG000000006114 | 17_35826456_C_A_b37     | 2.16E-22 | 0.000339997 | r853208   | SYNRG        | synergin, gamma [Source:HGNC Symbol;Acc:557]                                                                                |
| ENSG000000006114 | 17_35839021_C_T_b37     | 2.00E-22 | 0.000339997 | r2522972  | SYNRG        | synergin, gamma [Source:HGNC Symbol;Acc:557]                                                                                |
| ENSG000000006114 | 17_35860964_T_C_b37     | 5.24E-24 | 0.000339997 | r853214   | SYNRG        | synergin, gamma [Source:HGNC Symbol;Acc:557]                                                                                |
| ENSG000000006114 | 17_35866325_A_C_b37     | 2.17E-23 | 0.000339997 | r11653332 | SYNRG        | synergin, gamma [Source:HGNC Symbol;Acc:557]                                                                                |
| ENSG000000087076 | 19_49379866_A_G_b37     | 3.69E-11 | 0.000339997 | r580907   | HSD17B14     | hydroxysteroid (17-beta) dehydrogenase 14 [Source:HGNC Symbol;Acc:23238]                                                    |
| ENSG000000087076 | 19_49396737_G_A_b37     | 2.54E-06 | 0.000339997 | r9941490  | HSD17B14     | hydroxysteroid (17-beta) dehydrogenase 14 [Source:HGNC Symbol;Acc:23238]                                                    |
| ENSG000000235725 | 2_65820608_T_C_b37      | 1.31E-13 | 0.000349997 | r11687213 | AC007389.3   |                                                                                                                             |
| ENSG000000093183 | 3_42581680_A_G_b37      | 1.51E-05 | 0.000349997 | r342507   | SEC22C       | SEC22 vesicle trafficking protein homolog C (S. cerevisiae) [Source:HGNC Symbol;Acc:16828]                                  |
| ENSG00000114857  | 3_42581680_A_G_b37      | 1.79E-05 | 0.000349997 | r342507   | NKTR         | natural killer-tumor recognition sequence [Source:HGNC Symbol;Acc:7833]                                                     |
| ENSG00000108264  | 17_35835031_G_A_b37     | 9.96E-25 | 0.000349997 | r2107104  | TADA2A       | transcriptional adaptor 2A [Source:HGNC Symbol;Acc:11531]                                                                   |
| ENSG00000108264  | 17_35848255_A_C_b37     | 5.35E-24 | 0.000349997 | r853195   | TADA2A       | transcriptional adaptor 2A [Source:HGNC Symbol;Acc:11531]                                                                   |
| ENSG000000006114 | 17_35835031_G_A_b37     | 1.13E-21 | 0.000349997 | r2107104  | SYNRG        | synergin, gamma [Source:HGNC Symbol;Acc:557]                                                                                |
| ENSG000000006114 | 17_35848255_A_C_b37     | 2.83E-23 | 0.000349997 | r853195   | SYNRG        | synergin, gamma [Source:HGNC Symbol;Acc:557]                                                                                |
| ENSG000000087076 | 19_49378514_A_G_b37     | 3.93E-11 | 0.000349997 | r594600   | HSD17B14     | hydroxysteroid (17-beta) dehydrogenase 14 [Source:HGNC Symbol;Acc:23238]                                                    |
| ENSG00000105559  | 19_49378514_A_G_b37     | 3.68E-05 | 0.000349997 | r594600   | PLEKHA4      | pleckstrin homology domain containing, family A (phosphoinositide binding specific) member 4 [Source:HGNC Symbol;Acc:14339] |
| ENSG00000104804  | 19_49378514_A_G_b37     | 7.38E-05 | 0.000349997 | r594600   | TULP2        | tubby like protein 2 [Source:HGNC Symbol;Acc:12424]                                                                         |
| ENSG00000108264  | 17_35833208_T_C_b37     | 1.18E-24 | 0.000359996 | r6607275  | TADA2A       | transcriptional adaptor 2A [Source:HGNC Symbol;Acc:11531]                                                                   |
| ENSG000000006114 | 17_35833208_T_C_b37     | 1.53E-21 | 0.000359996 | r6607275  | SYNRG        | synergin, gamma [Source:HGNC Symbol;Acc:557]                                                                                |
| ENSG00000148426  | 10_11865304_C_T_b37     | 6.49E-06 | 0.000369996 | r4750123  | PROSER2      | proline and serine-rich protein 2 [Source:HGNC Symbol;Acc:23728]                                                            |
| ENSG00000108264  | 17_35816318_C_G_b37     | 3.33E-24 | 0.000369996 | r2522965  | TADA2A       | transcriptional adaptor 2A [Source:HGNC Symbol;Acc:11531]                                                                   |
| ENSG000000006114 | 17_35816318_C_G_b37     | 2.25E-22 | 0.000369996 | r2522965  | SYNRG        | synergin, gamma [Source:HGNC Symbol;Acc:557]                                                                                |
| ENSG00000108264  | 17_35856593_A_G_b37     | 5.13E-24 | 0.000379996 | r11870754 | TADA2A       | transcriptional adaptor 2A [Source:HGNC Symbol;Acc:11531]                                                                   |
| ENSG000000006114 | 17_35856593_A_G_b37     | 4.75E-24 | 0.000379996 | r11870754 | SYNRG        | synergin, gamma [Source:HGNC Symbol;Acc:557]                                                                                |
| ENSG000000087076 | 19_49395673_A_C_b37     | 1.86E-06 | 0.000379996 | r27254122 | HSD17B14     | hydroxysteroid (17-beta) dehydrogenase 14 [Source:HGNC Symbol;Acc:23238]                                                    |
| ENSG000000235725 | 2_65843579_G_T_b37      | 5.90E-07 | 0.000399996 | r27557512 | AC007389.3   |                                                                                                                             |
| ENSG00000173376  | 4_121994727_C_T_b37     | 2.90E-05 | 0.000399996 | r28567741 | NDNF         | neuron-derived neurotrophic factor [Source:HGNC Symbol;Acc:26256]                                                           |
| ENSG00000108264  | 17_35821758_A_T_b37     | 3.30E-24 | 0.000399996 | r853191   | TADA2A       | transcriptional adaptor 2A [Source:HGNC Symbol;Acc:11531]                                                                   |
| ENSG000000006114 | 17_35821758_A_T_b37     | 2.20E-22 | 0.000399996 | r853191   | SYNRG        | synergin, gamma [Source:HGNC Symbol;Acc:557]                                                                                |
| ENSG00000116127  | 2_73816285_A_G_b37      | 7.09E-06 | 0.000409996 | r6722867  | ALMS1        | Alstrom syndrome 1 [Source:HGNC Symbol;Acc:428]                                                                             |
| ENSG00000163016  | 2_73816285_A_G_b37      | 1.18E-05 | 0.000409996 | r6722867  | ALMS1P       | Alstrom syndrome 1 pseudogene [Source:HGNC Symbol;Acc:29586]                                                                |
| ENSG000000087076 | 19_49378699_CAGAT_C_b37 | 2.71E-09 | 0.000409996 | r5828365  | HSD17B14     | hydroxysteroid (17-beta) dehydrogenase 14 [Source:HGNC Symbol;Acc:23238]                                                    |
| ENSG00000105559  | 19_49378699_CAGAT_C_b37 | 2.89E-05 | 0.000409996 | r5828365  | PLEKHA4      | pleckstrin homology domain containing, family A (phosphoinositide binding specific) member 4 [Source:HGNC Symbol;Acc:14339] |
| ENSG00000104804  | 19_49378699_CAGAT_C_b37 | 2.27E-05 | 0.000409996 | r5828365  | TULP2        | tubby like protein 2 [Source:HGNC Symbol;Acc:12424]                                                                         |
| ENSG00000116127  | 2_73828538_G_A_b37      | 4.96E-06 | 0.000419996 | r1052161  | ALMS1        | Alstrom syndrome 1 [Source:HGNC Symbol;Acc:428]                                                                             |
| ENSG00000163016  | 2_73828538_G_A_b37      | 5.88E-06 | 0.000419996 | r1052161  | ALMS1P       | Alstrom syndrome 1 pseudogene [Source:HGNC Symbol;Acc:29586]                                                                |
| ENSG000000250321 | 4_701500_A_G_b37        | 5.22E-06 | 0.000419996 | r28507182 | RP11-478C6.4 |                                                                                                                             |
| ENSG00000108264  | 17_35851177_A_C_b37     | 4.30E-23 | 0.000429996 | r865483   | TADA2A       | transcriptional adaptor 2A [Source:HGNC Symbol;Acc:11531]                                                                   |
| ENSG00000108264  | 17_35851751_G_A_b37     | 5.13E-24 | 0.000429996 | r9906140  | TADA2A       | transcriptional adaptor 2A [Source:HGNC Symbol;Acc:11531]                                                                   |
| ENSG000000006114 | 17_35851177_A_C_b37     | 2.06E-22 | 0.000429996 | r865483   | SYNRG        | synergin, gamma [Source:HGNC Symbol;Acc:557]                                                                                |
| ENSG000000006114 | 17_35851751_G_A_b37     | 4.75E-24 | 0.000429996 | r9906140  | SYNRG        | synergin, gamma [Source:HGNC Symbol;Acc:557]                                                                                |
| ENSG00000155542  | 5_56261691_G_A_b37      | 3.73E-43 | 0.000439996 | r2662021  | SETD9        | SET domain containing 9 [Source:HGNC Symbol;Acc:28508]                                                                      |
| ENSG00000108264  | 17_35868304_T_C_b37     | 1.62E-23 | 0.000439996 | r12603185 | TADA2A       | transcriptional adaptor 2A [Source:HGNC Symbol;Acc:11531]                                                                   |
| ENSG00000108264  | 17_35875511_C_CAA_b37   | 1.94E-22 | 0.000439996 | r10648808 | TADA2A       | transcriptional adaptor 2A [Source:HGNC Symbol;Acc:11531]                                                                   |
| ENSG000000006114 | 17_35868304_T_C_b37     | 3.59E-25 | 0.000439996 | r12603185 | SYNRG        | synergin, gamma [Source:HGNC Symbol;Acc:557]                                                                                |
| ENSG000000006114 | 17_35875511_C_CAA_b37   | 1.64E-22 | 0.000439996 | r10648808 | SYNRG        | synergin, gamma [Source:HGNC Symbol;Acc:557]                                                                                |
| ENSG000000217702 | 2_74363344_C_T_b37      | 1.03E-05 | 0.000449996 | r9917179  | MGC10955     |                                                                                                                             |
| ENSG00000108264  | 17_35848045_A_C_b37     | 2.56E-24 | 0.000469995 | r853194   | TADA2A       | transcriptional adaptor 2A [Source:HGNC Symbol;Acc:11531]                                                                   |
| ENSG000000006114 | 17_35848045_A_C_b37     | 2.70E-23 | 0.000469995 | r853194   | SYNRG        | synergin, gamma [Source:HGNC Symbol;Acc:557]                                                                                |
| ENSG00000132185  | 1_161679644_T_C_b37     | 3.49E-05 | 0.000479995 | r7523762  | FCRLA        | Fc receptor-like A [Source:HGNC Symbol;Acc:18504]                                                                           |
| ENSG00000140577  | 15_91014946_G_A_b37     | 3.39E-05 | 0.000479995 | r62021772 | CRTC3        | CREB regulated transcription coactivator 3 [Source:HGNC Symbol;Acc:26148]                                                   |
